# Supplementary material for: Impact of the national home safety equipment scheme ‘Safe At Home’ on hospital admissions for unintentional injury in children under 5: a controlled interrupted time series analysis
Source: PubMed Central journal article supplement (PMC8666806; doi:10.1136/jech-2021-216613), 2021-06-22
Supplement: jech-2021-216613supp001.pdf [file jech-2021-216613supp001.pdf]

**Figure S1. Selection of Lower Super Output Areas for the analysis.**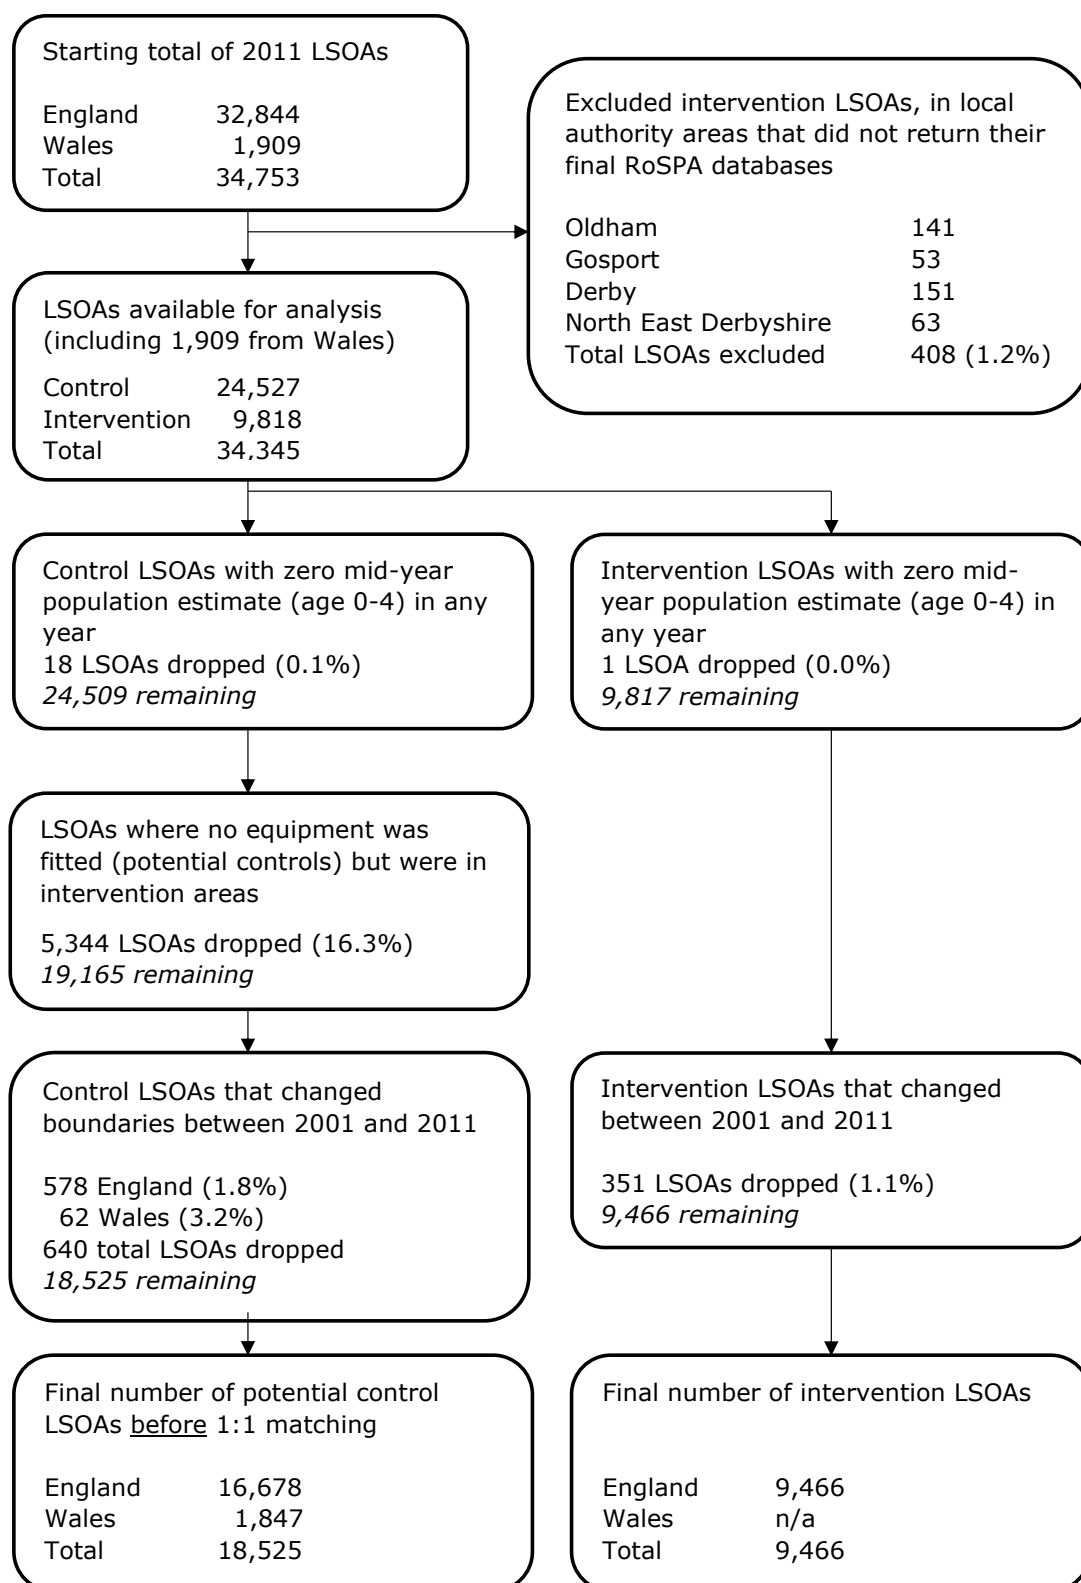

**Figure S2: Cumulative percentage of households having safety equipment installed by implementation month (N= 57,656 households)**

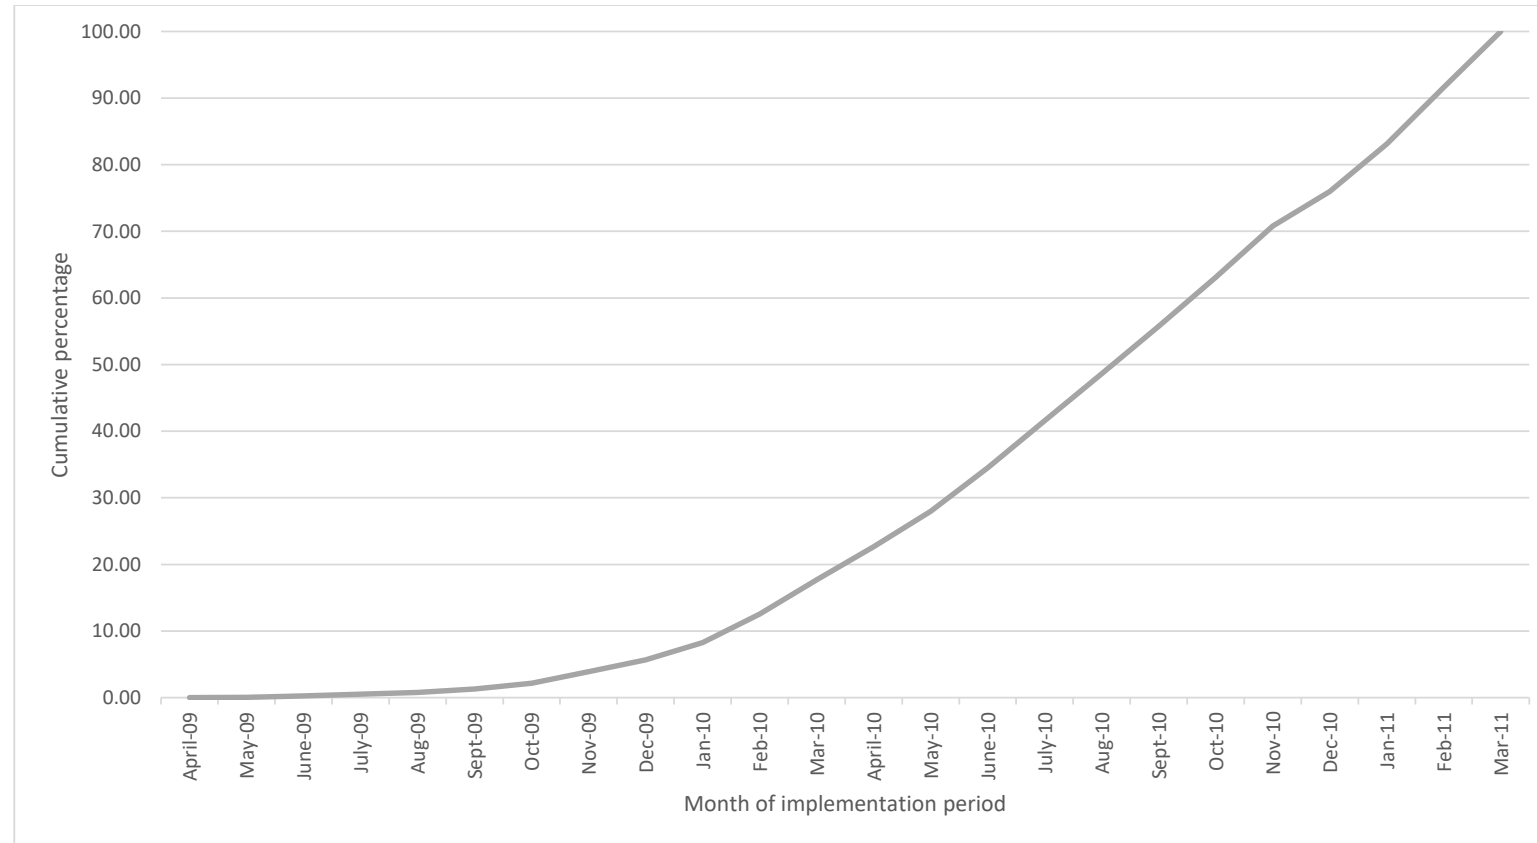

**Figure S3: Crude annual hospital admission rates for all home injuries in intervention and control areas from 2004 to 2015**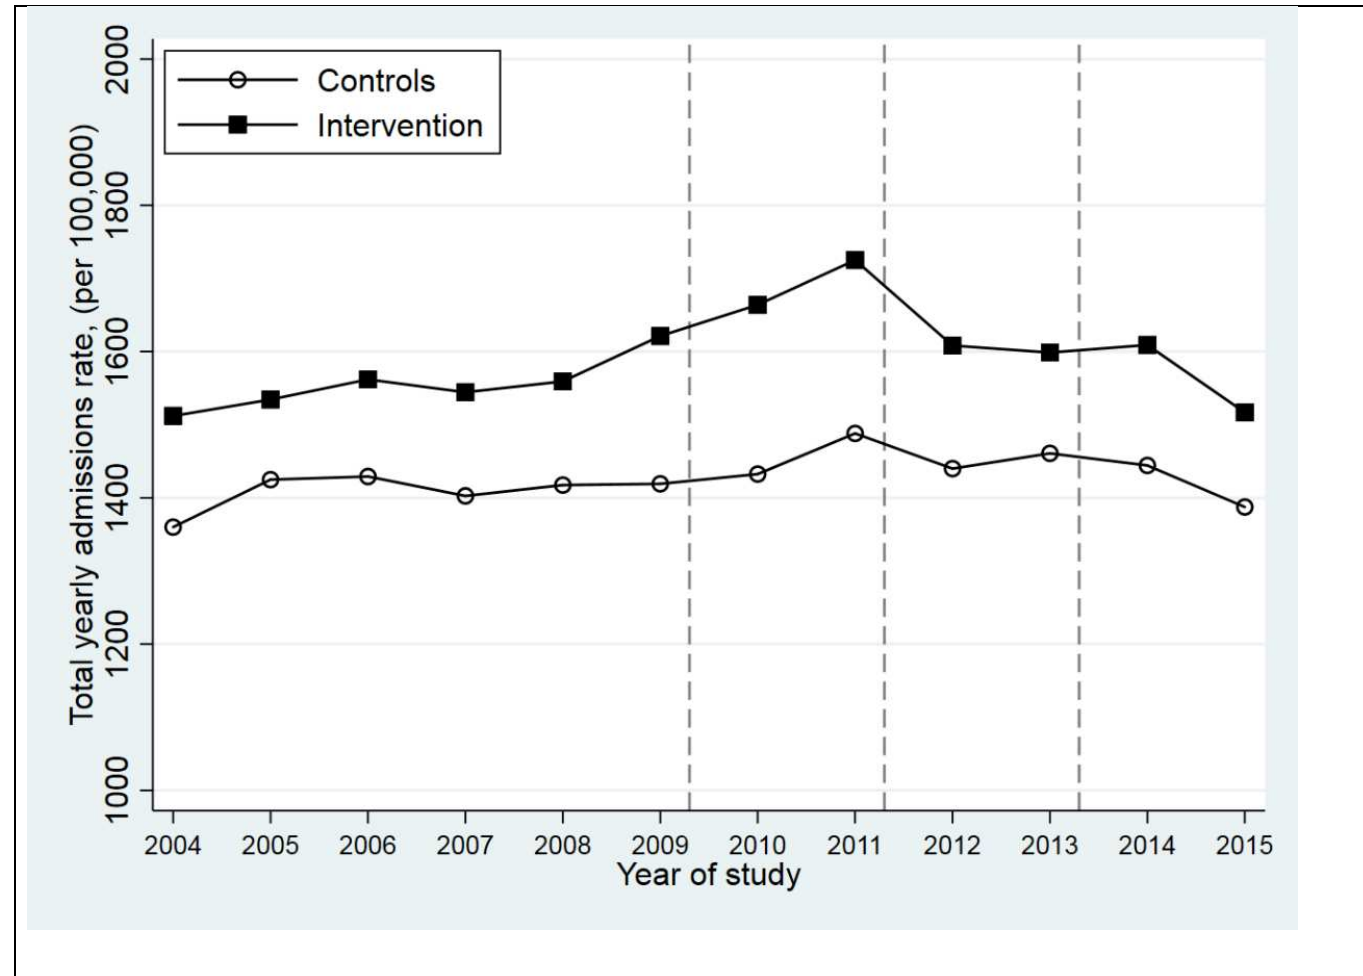

**Figure S4: Trends in predicted deseasonalised hospital admission rates before, during and after the Safe At Home scheme in intervention and control areas, stratified by equipment density.**

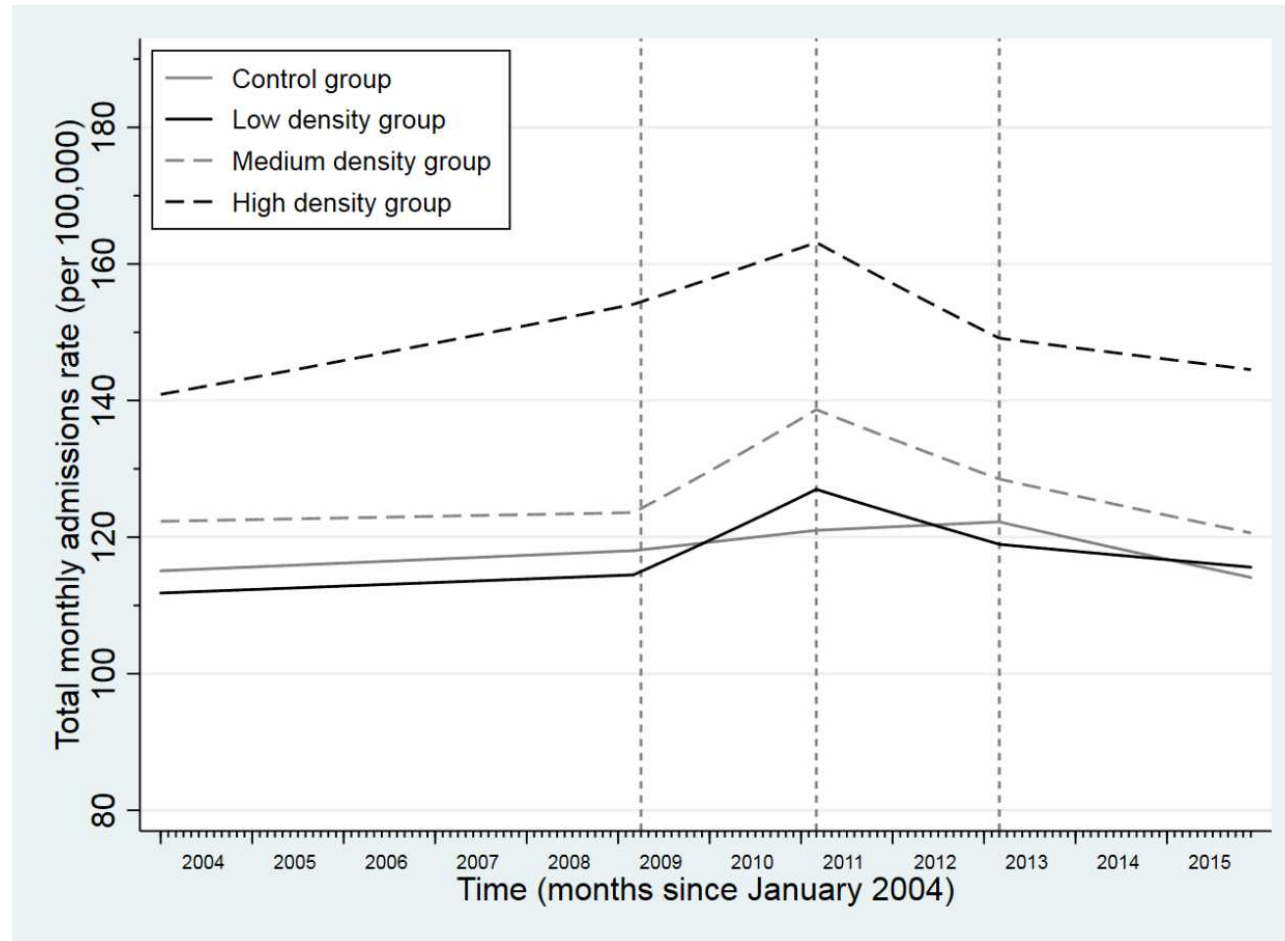

**Table S1: Adjusted trends in predicted hospital admission rates according to equipment density before, during and after the Safe At Home scheme in intervention and control areas**

| Time point                                     | Predicted deseasonalised hospital admission rate per 100,000 per month and 95% Confidence Interval |                                   |                                    |                                    | Difference in Trends <sup>1,3</sup> |
|------------------------------------------------|----------------------------------------------------------------------------------------------------|-----------------------------------|------------------------------------|------------------------------------|-------------------------------------|
|                                                | Control areas                                                                                      | Intervention areas                |                                    |                                    |                                     |
|                                                |                                                                                                    | Low equipment density             | Medium equipment density           | High equipment density             |                                     |
| <b>Baseline period</b>                         |                                                                                                    |                                   |                                    |                                    |                                     |
| January 2004                                   | 115.1 (112.5 – 117.8)                                                                              | 111.8 (108.4 – 115.4)             | 122.3 (118.7 – 126.1)              | 140.9 (137.0 – 145.0)              |                                     |
| March 2009                                     | 118.03 (115.7 – 120.4)                                                                             | 114.5 (111.5 – 117.5)             | 123.60 (120.4 – 126.8)             | 154.10 (150.5 – 157.8)             |                                     |
| Change in rate per month (%) <sup>2</sup>      | 0.04 (-0.02 – 0.10)<br>P = 0.17                                                                    | 0.04 (-0.04 – 0.12)<br>P = 0.34   | 0.02 (-0.06 – 0.09)<br>P = 0.67    | 0.14 (0.07 – 0.22)<br>P < 0.001    | 0.10 (0.01 – 0.20)<br>P = 0.03      |
| <b>Implementation period</b>                   |                                                                                                    |                                   |                                    |                                    |                                     |
| April 2009                                     | 118.2 (116.0 – 120.4)                                                                              | 115.0 (112.2 – 117.9)             | 124.2 (121.2 – 127.3)              | 154.5 (151.0 – 158.0)              |                                     |
| March 2011                                     | 121.0 (118.1 – 124.0)                                                                              | 127.00 (123.1 – 131.0)            | 138.7 (134.4 – 143.0)              | 163.2 (158.5 – 167.9)              |                                     |
| Change in rate per month                       | 0.10 (-0.04 – 0.25)<br>P = 0.16                                                                    | 0.43 (0.25 – 0.62)<br>P < 0.001   | 0.48 (0.29 – 0.66)<br>P < 0.001    | 0.24 (0.07 – 0.41)<br>P = 0.006    | 0.13 (-0.09 – 0.36)<br>P = 0.24     |
| <b>1<sup>st</sup> post intervention period</b> |                                                                                                    |                                   |                                    |                                    |                                     |
| April 2011                                     | 121.1 (118.3 – 123.9)                                                                              | 126.7 (122.9 – 130.5)             | 138.2 (134.2 – 142.4)              | 162.6 (158.2 – 167.1)              |                                     |
| March 2013                                     | 122.2 (119.4 – 125.1)                                                                              | 119.0 (115.4 – 122.7)             | 128.5 (124.7 – 132.5)              | 149.1 (145.0 – 153.4)              |                                     |
| Change in rate per month                       | 0.04 (-0.11 – 0.20)<br>P = 0.60                                                                    | -0.27 (-0.48 – -0.07)<br>P = 0.01 | -0.32 (-0.52 – -0.12)<br>P = 0.002 | -0.37 (-0.56 – -0.19)<br>P < 0.001 | -0.42 (-0.66 – -0.17)<br>P = 0.001  |
| <b>2<sup>nd</sup> post intervention period</b> |                                                                                                    |                                   |                                    |                                    |                                     |
| April 2013                                     | 122.0 (119.3 – 124.7)                                                                              | 118.9 (115.4 – 122.4)             | 128.3 (124.6 – 132.0)              | 149.0 (145.0 – 153.1)              |                                     |
| December 2015                                  | 114.1 (110.8 – 117.5)                                                                              | 115.6 (111.2 – 120.1)             | 120.6 (116.1 – 125.3)              | 144.5 (139.5 – 149.8)              |                                     |
| Change in rate per month                       | -0.21 (-0.34 – -0.08)<br>P = 0.002                                                                 | -0.09 (-0.26 – 0.09)<br>P = 0.33  | -0.19 (-0.37 – -0.02)<br>P = 0.03  | -0.09 (-0.26 – 0.07)<br>P = 0.25   | 0.11 (-0.10 – 0.32)<br>P = 0.29     |

<sup>1</sup> Between the high density group and the controls

<sup>2</sup> The change in rate per month is the incidence rate ratio (IRR) and reflects the percentage change in the injury rate per month.

<sup>3</sup> The difference in trends is the difference between the change in rate in intervention areas and the change in rates in the control areas.

**Table S2: Adjusted trends in predicted hospital admission rates for equipment preventable injuries, before, during and after the Safe At Home scheme in intervention and control areas**

| Time point                                     | Predicted deseasonalised hospital admission rate per 100,000 per month and 95% Confidence Interval |                                   | Difference in Trends <sup>1,3</sup> |
|------------------------------------------------|----------------------------------------------------------------------------------------------------|-----------------------------------|-------------------------------------|
|                                                | Control                                                                                            | Intervention                      |                                     |
| <b>Baseline period</b>                         |                                                                                                    |                                   |                                     |
| January 2004                                   | 31.70 (30.60 – 32.84)                                                                              | 33.65 (32.53 – 34.82)             |                                     |
| March 2009                                     | 31.07 (30.15 – 32.02)                                                                              | 36.81 (35.77 – 37.87)             |                                     |
| Change in rate per month (%) <sup>2</sup>      | -0.03 (-0.12 – 0.06)<br>P = 0.48                                                                   | 0.14 (0.06 – 0.23)<br>P = 0.001   | 0.18 (0.05 – 0.30)<br>P = 0.005     |
| <b>Implementation period</b>                   |                                                                                                    |                                   |                                     |
| April 2009                                     | 31.25 (30.37 – 32.16)                                                                              | 36.85 (35.87 – 37.87)             |                                     |
| March 2011                                     | 35.78 (34.53 – 37.08)                                                                              | 37.92 (36.63 – 39.27)             |                                     |
| Change in rate per month                       | 0.59 (0.38 – 0.80)<br>P < 0.001                                                                    | 0.12 (-0.08 – 0.33)<br>P = 0.24   | -0.46 (-0.76 – -0.17)<br>P = 0.002  |
| <b>1<sup>st</sup> post intervention period</b> |                                                                                                    |                                   |                                     |
| April 2011                                     | 35.89 (34.70 – 37.12)                                                                              | 37.82 (36.59 – 39.09)             |                                     |
| March 2013                                     | 38.46 (37.19 – 39.78)                                                                              | 35.42 (34.23 – 36.65)             |                                     |
| Change in rate per month                       | 0.30 (0.07 – 0.53)<br>P = 0.01                                                                     | -0.28 (-0.51 – -0.06)<br>P = 0.01 | -0.59 (-0.91 – -0.26)<br>P < 0.001  |
| <b>2<sup>nd</sup> post intervention period</b> |                                                                                                    |                                   |                                     |
| April 2013                                     | 38.18 (36.97 – 39.43)                                                                              | 35.35 (34.22 – 36.52)             |                                     |
| December 2015                                  | 30.10 (28.81 – 31.45)                                                                              | 33.24 (31.83 – 34.71)             |                                     |
| Change in rate per month                       | -0.74 (-0.94 – -0.55)<br>P < 0.001                                                                 | -0.19 (-0.39 – 0.004)<br>P = 0.05 | 0.55 (0.27 – 0.83)<br>P < 0.001     |

<sup>1</sup> Across all time points, within each time period.

<sup>2</sup> The change in rate per month is the incidence rate ratio (IRR) and reflects the percentage change in the injury rate per month.

<sup>3</sup> The difference in trends is the difference between the change in rate in intervention areas and the change in rates in the control areas.

**Figure S5: Crude annual hospital admission rates for equipment preventable injuries, in intervention and control areas from 2004 to 2015**

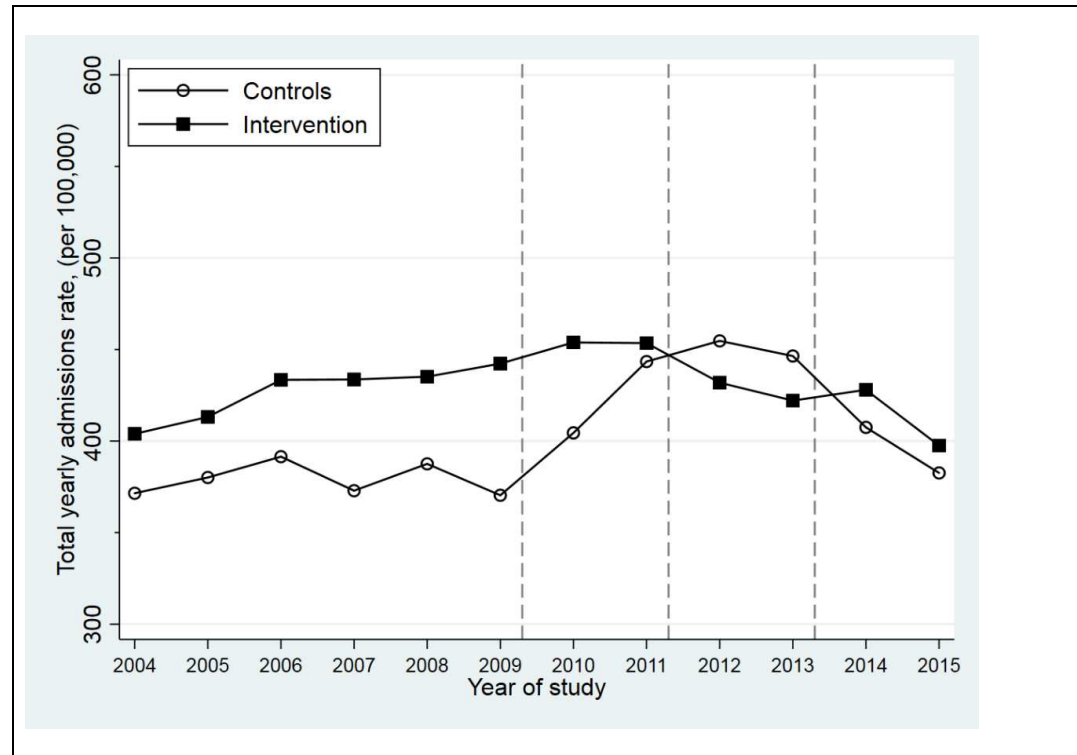

**Table S3: Crude annual hospital admission rates for equipment preventable injuries in intervention and control areas from 2004 to 2015 by thirds of equipment density**

| Year of study | Injury rate per 100,000 population and 95% confidence interval |                          |                          |                          |
|---------------|----------------------------------------------------------------|--------------------------|--------------------------|--------------------------|
|               | Control areas                                                  | Low equipment density    | Medium equipment density | High equipment Density   |
| 2004          | 371.51 (358.79 – 384.55)                                       | 336.66 (316.02 – 358.29) | 412.29 (389.17 – 436.43) | 459.68 (436.21 – 484.10) |
| 2005          | 380.12 (367.33 – 393.23)                                       | 367.22 (345.86 – 389.56) | 390.35 (368.00 – 413.69) | 477.44 (453.74 – 502.06) |
| 2006          | 391.49 (378.64 – 404.65)                                       | 400.85 (378.81 – 423.84) | 407.51 (384.92 – 431.09) | 487.88 (464.22 – 512.44) |
| 2007          | 372.89 (360.57 – 385.54)                                       | 359.48 (338.98 – 380.89) | 421.41 (398.74 – 445.03) | 515.47 (491.45 – 540.36) |
| 2008          | 387.56 (375.20 – 400.22)                                       | 386.46 (365.57 – 408.22) | 414.36 (392.25 – 437.39) | 500.94 (477.62 – 525.10) |
| 2009          | 370.40 (358.49 – 382.60)                                       | 374.27 (354.00 – 395.40) | 389.22 (368.06 – 411.27) | 556.52 (532.21 – 581.65) |
| 2010          | 404.48 (392.20 – 417.04)                                       | 407.11 (386.17 – 428.89) | 432.46 (410.38 – 455.42) | 518.50 (495.30 – 542.52) |
| 2011          | 443.43 (430.72 – 456.42)                                       | 409.33 (388.51 – 430.97) | 439.87 (417.72 – 462.88) | 508.84 (485.97 – 532.51) |
| 2012          | 454.73 (442.00 – 467.73)                                       | 394.06 (373.85 – 415.07) | 407.40 (386.32 – 429.33) | 491.29 (469.01 – 514.34) |
| 2013          | 446.47 (433.90 – 459.30)                                       | 404.14 (383.74 – 425.34) | 404.79 (383.89 – 426.53) | 455.68 (434.30 – 477.84) |
| 2014          | 407.48 (395.51 – 419.71)                                       | 400.93 (380.66 – 422.00) | 401.38 (380.63 – 422.97) | 479.11 (457.22 – 501.78) |
| 2015          | 382.61 (371.01 – 394.47)                                       | 374.38 (354.83 – 394.73) | 388.40 (368.03 – 409.62) | 428.67 (407.98 – 450.13) |



**Table S4: Adjusted trends in predicted hospital admission rates for equipment preventable injuries before, during and after the SAH scheme in intervention and control areas by thirds of equipment density**

| Time point                                     | Predicted deseasonalised hospital admission rate per 100,000 per month and 95% Confidence Interval |                                   |                                   |                                    | Difference in Trends <sup>1,3</sup> |
|------------------------------------------------|----------------------------------------------------------------------------------------------------|-----------------------------------|-----------------------------------|------------------------------------|-------------------------------------|
|                                                | Control                                                                                            | Low equipment density             | Medium equipment density          | High equipment density             |                                     |
| <b>Baseline period</b>                         |                                                                                                    |                                   |                                   |                                    |                                     |
| January 2004                                   | 31.69 (30.56 – 32.88)                                                                              | 29.31 (27.75 – 30.96)             | 33.78 (32.04 – 35.61)             | 37.72 (35.95 – 39.57)              |                                     |
| March 2009                                     | 31.07 (30.12 – 32.06)                                                                              | 31.89 (30.47 – 33.36)             | 33.66 (32.18 – 35.19)             | 44.42 (42.70 – 46.21)              |                                     |
| Change in rate per month (%) <sup>2</sup>      | -0.03 (-0.12 – 0.06)<br>P = 0.497                                                                  | 0.14 (0.001 – 0.27)<br>P = 0.051  | -0.01 (-0.14 – 0.13)<br>P = 0.931 | 0.26 (0.14 – 0.38)<br>P < 0.001    | 0.30 (0.14 – 0.45)<br>P < 0.001     |
| <b>Implementation period</b>                   |                                                                                                    |                                   |                                   |                                    |                                     |
| April 2009                                     | 31.25 (30.34 – 32.19)                                                                              | 31.98 (30.64 – 33.38)             | 33.77 (32.36 – 35.23)             | 44.35 (42.73 – 46.05)              |                                     |
| March 2011                                     | 35.78 (34.47 – 37.13)                                                                              | 34.29 (32.49 – 36.18)             | 36.37 (34.47 – 38.38)             | 42.90 (40.86 – 45.05)              |                                     |
| Change in rate per month (%) <sup>2</sup>      | 0.59 (0.37 – 0.81)<br>P < 0.001                                                                    | 0.30 (-0.02 – 0.62)<br>P = 0.066  | 0.32 (0.003 – 0.64)<br>P = 0.048  | -0.14 (-0.43 – 0.14)<br>P = 0.325  | -0.73 (-1.10 – -0.37)<br>P < 0.001  |
| <b>1<sup>st</sup> post intervention period</b> |                                                                                                    |                                   |                                   |                                    |                                     |
| April 2011                                     | 35.88 (34.64 – 37.17)                                                                              | 34.25 (32.54 – 36.04)             | 36.26 (34.46 – 38.15)             | 42.74 (40.80 – 44.76)              |                                     |
| March 2013                                     | 38.46 (37.13 – 39.84)                                                                              | 33.30 (31.61 – 35.07)             | 33.68 (31.96 – 35.50)             | 39.06 (37.22 – 41.00)              |                                     |
| Change in rate per month (%) <sup>2</sup>      | 0.30 (0.06 – 0.54)<br>P = 0.013                                                                    | -0.12 (-0.47 – 0.23)<br>P = 0.492 | -0.32 (-0.67 – 0.03)<br>P = 0.073 | -0.39 (-0.71 – -0.07)<br>P = 0.017 | -0.69 (-1.09 – -0.29)<br>P = 0.001  |
| <b>2<sup>nd</sup> post intervention period</b> |                                                                                                    |                                   |                                   |                                    |                                     |
| April 2013                                     | 38.18 (36.91 – 39.49)                                                                              | 33.23 (31.62 – 34.92)             | 33.63 (31.98 – 35.36)             | 38.97 (37.21 – 40.82)              |                                     |
| December 2015                                  | 30.11 (28.76 – 31.51)                                                                              | 31.27 (29.27 – 33.40)             | 32.07 (30.01 – 34.28)             | 36.23 (34.06 – 38.54)              |                                     |
| Change in rate per month (%) <sup>2</sup>      | -0.74 (-0.95 – -0.54)<br>P < 0.001                                                                 | -0.19 (-0.49 – 0.11)<br>P = 0.211 | -0.15 (-0.45 – 0.15)<br>P = 0.335 | -0.23 (-0.51 – 0.05)<br>P = 0.109  | 0.51 (0.17 – 0.86)<br>P = 0.004     |

<sup>1</sup> Between the high density group and the control group.

<sup>2</sup> The change in rate per month is the incidence rate ratio (IRR) and reflects the percentage change in the injury rate per month.

<sup>3</sup> The difference in trends is the difference between the change in rate in intervention areas and the change in rates in the control areas.
