# Supplementary material for: Impact of the national home safety equipment scheme ‘Safe At Home’ on hospital admissions for unintentional injury in children under 5: a controlled interrupted time series analysis
Source: PubMed Central journal article supplement (PMC8666806; doi:10.1136/jech-2021-216613), 2021-06-22
Supplement: jech-2021-216613supp002.pdf [file jech-2021-216613supp002.pdf]

| <b>code</b> | <b>description</b>                                                 | <b>Included in all injury analysis</b> | <b>Included in equipment preventable analysis</b> |
|-------------|--------------------------------------------------------------------|----------------------------------------|---------------------------------------------------|
| S00         | Superficial injury of head                                         | Yes                                    | Yes                                               |
| S000        | Superficial injury of scalp                                        | Yes                                    | Yes                                               |
| S001        | Contusion of eyelid and periocular area                            | Yes                                    | Yes                                               |
| S002        | Other superficial injuries of eyelid and periocular area           | Yes                                    | Yes                                               |
| S003        | Superficial injury of nose                                         | Yes                                    | Yes                                               |
| S004        | Superficial injury of ear                                          | Yes                                    | Yes                                               |
| S005        | Superficial injury of lip and oral cavity                          | Yes                                    | Yes                                               |
| S007        | Multiple superficial injuries of head                              | Yes                                    | Yes                                               |
| S008        | Superficial injury of other parts of head                          | Yes                                    | Yes                                               |
| S009        | Superficial injury of head, part unspecified                       | Yes                                    | Yes                                               |
| S01         | Open wound of head                                                 | Yes                                    | Yes                                               |
| S010        | Open wound of scalp                                                | Yes                                    | Yes                                               |
| S011        | Open wound of eyelid and periocular area                           | Yes                                    | Yes                                               |
| S012        | Open wound of nose                                                 | Yes                                    | Yes                                               |
| S013        | Open wound of ear                                                  | Yes                                    | Yes                                               |
| S014        | Open wound of cheek and temporomandibular area                     | Yes                                    | Yes                                               |
| S015        | Open wound of lip and oral cavity                                  | Yes                                    | Yes                                               |
| S017        | Multiple open wounds of head                                       | Yes                                    | Yes                                               |
| S018        | Open wound of other parts of head                                  | Yes                                    | Yes                                               |
| S019        | Open wound of head, part unspecified                               | Yes                                    | Yes                                               |
| S02         | Fracture of skull and facial bones                                 | Yes                                    | Yes                                               |
| S020        | Fracture of vault of skull                                         | Yes                                    | Yes                                               |
| S021        | Fracture of base of skull                                          | Yes                                    | Yes                                               |
| S022        | Fracture of nasal bones                                            | Yes                                    | Yes                                               |
| S023        | Fracture of orbital floor                                          | Yes                                    | Yes                                               |
| S024        | Fracture of malar and maxillary bones                              | Yes                                    | Yes                                               |
| S025        | Fracture of tooth                                                  | Yes                                    | Yes                                               |
| S026        | Fracture of mandible                                               | Yes                                    | Yes                                               |
| S027        | Multiple fractures involving skull and facial bones                | Yes                                    | Yes                                               |
| S028        | Fractures of other skull and facial bones                          | Yes                                    | Yes                                               |
| S029        | Fracture of skull and facial bones, part unspecified               | Yes                                    | Yes                                               |
| S03         | Dislocation, sprain and strain of joints and ligaments of head     | Yes                                    | Yes                                               |
| S030        | Dislocation of jaw                                                 | Yes                                    | Yes                                               |
| S031        | Dislocation of septal cartilage of nose                            | Yes                                    | Yes                                               |
| S032        | Dislocation of tooth                                               | Yes                                    | Yes                                               |
| S033        | Dislocation of other and unspecified parts of head                 | Yes                                    | Yes                                               |
| S034        | Sprain and strain of jaw                                           | Yes                                    | Yes                                               |
| S035        | Sprain and strain of joints and ligaments of other and unspecified | Yes                                    | Yes                                               |
| S04         | Injury of cranial nerves                                           | Yes                                    | Yes                                               |
| S040        | Injury of optic nerve and pathways                                 | Yes                                    | Yes                                               |
| S041        | Injury of oculomotor nerve                                         | Yes                                    | Yes                                               |
| S042        | Injury of trochlear nerve                                          | Yes                                    | Yes                                               |
| S043        | Injury of trigeminal nerve                                         | Yes                                    | Yes                                               |
| S044        | Injury of abducent nerve                                           | Yes                                    | Yes                                               |
| S045        | Injury of facial nerve                                             | Yes                                    | Yes                                               |
| S046        | Injury of acoustic nerve                                           | Yes                                    | Yes                                               |
| S047        | Injury of accessory nerve                                          | Yes                                    | Yes                                               |
| S048        | Injury of other cranial nerves                                     | Yes                                    | Yes                                               |
| S049        | Injury of unspecified cranial nerve                                | Yes                                    | Yes                                               |
| S05         | Injury of eye and orbit                                            | Yes                                    | Yes                                               |

|      |                                                                           |     |     |
|------|---------------------------------------------------------------------------|-----|-----|
| S050 | Injury of conjunctiva and corneal abrasion without mention of eye         | Yes | Yes |
| S051 | Contusion of eyeball and orbital tissues                                  | Yes | Yes |
| S052 | Ocular laceration and rupture with prolapse or loss of intraocular tissue | Yes | Yes |
| S053 | Ocular laceration without prolapse or loss of intraocular tissue          | Yes | Yes |
| S054 | Penetrating wound of orbit with or without foreign body                   | Yes | Yes |
| S055 | Penetrating wound of eyeball with foreign body                            | Yes | Yes |
| S056 | Penetrating wound of eyeball without foreign body                         | Yes | Yes |
| S057 | Avulsion of eye                                                           | Yes | Yes |
| S058 | Other injuries of eye and orbit                                           | Yes | Yes |
| S059 | Injury of eye and orbit, unspecified                                      | Yes | Yes |
| S06  | Intracranial injury                                                       | Yes | Yes |
| S060 | Concussion                                                                | Yes | Yes |
| S061 | Traumatic cerebral oedema                                                 | Yes | Yes |
| S062 | Diffuse brain injury                                                      | Yes | Yes |
| S063 | Focal brain injury                                                        | Yes | Yes |
| S064 | Epidural haemorrhage                                                      | Yes | Yes |
| S065 | Traumatic subdural haemorrhage                                            | Yes | Yes |
| S066 | Traumatic subarachnoid haemorrhage                                        | Yes | Yes |
| S067 | Intracranial injury with prolonged coma                                   | Yes | Yes |
| S068 | Other intracranial injuries                                               | Yes | Yes |
| S069 | Intracranial injury, unspecified                                          | Yes | Yes |
| S07  | Crushing injury of head                                                   | Yes | Yes |
| S070 | Crushing injury of face                                                   | Yes | Yes |
| S071 | Crushing injury of skull                                                  | Yes | Yes |
| S078 | Crushing injury of other parts of head                                    | Yes | Yes |
| S079 | Crushing injury of head, part unspecified                                 | Yes | Yes |
| S08  | Traumatic amputation of part of head                                      | Yes | Yes |
| S080 | Avulsion of scalp                                                         | Yes | Yes |
| S081 | Traumatic amputation of ear                                               | Yes | Yes |
| S088 | Traumatic amputation of other parts of head                               | Yes | Yes |
| S089 | Traumatic amputation of unspecified part of head                          | Yes | Yes |
| S09  | Other and unspecified injuries of head                                    | Yes | Yes |
| S090 | Injury of blood vessels of head, not elsewhere classified                 | Yes | Yes |
| S091 | Injury of muscle and tendon of head                                       | Yes | Yes |
| S092 | Traumatic rupture of ear drum                                             | Yes | Yes |
| S097 | Multiple injuries of head                                                 | Yes | Yes |
| S098 | Other specified injuries of head                                          | Yes | Yes |
| S099 | Unspecified injury of head                                                | Yes | Yes |
| S10  | Superficial injury of neck                                                | Yes | Yes |
| S100 | Contusion of throat                                                       | Yes | Yes |
| S101 | Other and unspecified superficial injuries of throat                      | Yes | Yes |
| S107 | Multiple superficial injuries of neck                                     | Yes | Yes |
| S108 | Superficial injury of other parts of neck                                 | Yes | Yes |
| S109 | Superficial injury of neck, part unspecified                              | Yes | Yes |
| S11  | Open wound of neck                                                        | Yes | Yes |
| S110 | Open wound involving larynx and trachea                                   | Yes | Yes |
| S111 | Open wound involving thyroid gland                                        | Yes | Yes |
| S112 | Open wound involving pharynx and cervical oesophagus                      | Yes | Yes |
| S117 | Multiple open wounds of neck                                              | Yes | Yes |
| S118 | Open wound of other parts of neck                                         | Yes | Yes |
| S119 | Open wound of neck, part unspecified                                      | Yes | Yes |
| S12  | Fracture of neck                                                          | Yes | Yes |
| S120 | Fracture of first cervical vertebra                                       | Yes | Yes |

|      |                                                                                  |     |     |
|------|----------------------------------------------------------------------------------|-----|-----|
| S121 | Fracture of second cervical vertebra                                             | Yes | Yes |
| S122 | Fracture of other specified cervical vertebra                                    | Yes | Yes |
| S127 | Multiple fractures of cervical spine                                             | Yes | Yes |
| S128 | Fracture of other parts of neck                                                  | Yes | Yes |
| S129 | Fracture of neck, part unspecified                                               | Yes | Yes |
| S13  | Dislocation, sprain and strain of joints and ligaments at neck level             | Yes | Yes |
| S130 | Traumatic rupture of cervical intervertebral disc                                | Yes | Yes |
| S131 | Dislocation of cervical vertebra                                                 | Yes | Yes |
| S132 | Dislocation of other and unspecified parts of neck                               | Yes | Yes |
| S133 | Multiple dislocations of neck                                                    | Yes | Yes |
| S134 | Sprain and strain of cervical spine                                              | Yes | Yes |
| S135 | Sprain and strain of thyroid region                                              | Yes | Yes |
| S136 | Sprain and strain of joints and ligaments of other and unspecified parts of neck | Yes | Yes |
| S14  | Injury of nerves and spinal cord at neck level                                   | Yes | Yes |
| S140 | Concussion and oedema of cervical spinal cord                                    | Yes | Yes |
| S141 | Other and unspecified injuries of cervical spinal cord                           | Yes | Yes |
| S142 | Injury of nerve root of cervical spine                                           | Yes | Yes |
| S144 | Injury of peripheral nerves of neck                                              | Yes | Yes |
| S145 | Injury of cervical sympathetic nerves                                            | Yes | Yes |
| S146 | Injury of other and unspecified nerves of neck                                   | Yes | Yes |
| S15  | Injury of blood vessels at neck level                                            | Yes | Yes |
| S150 | Injury of carotid artery                                                         | Yes | Yes |
| S151 | Injury of vertebral artery                                                       | Yes | Yes |
| S152 | Injury of external jugular vein                                                  | Yes | Yes |
| S153 | Injury of internal jugular vein                                                  | Yes | Yes |
| S157 | Injury of multiple blood vessels at neck level                                   | Yes | Yes |
| S158 | Injury of other blood vessels at neck level                                      | Yes | Yes |
| S159 | Injury of unspecified blood vessel at neck level                                 | Yes | Yes |
| S16X | Injury of muscle and tendon at neck level                                        | Yes | Yes |
| S17  | Crushing injury of neck                                                          | Yes | Yes |
| S170 | Crushing injury of larynx and trachea                                            | Yes | Yes |
| S178 | Crushing injury of other parts of neck                                           | Yes | Yes |
| S179 | Crushing injury of neck, part unspecified                                        | Yes | Yes |
| S18X | Traumatic amputation at neck level                                               | Yes | Yes |
| S19  | Other and unspecified injuries of neck                                           | Yes | Yes |
| S197 | Multiple injuries of neck                                                        | Yes | Yes |
| S198 | Other specified injuries of neck                                                 | Yes | Yes |
| S199 | Unspecified injury of neck                                                       | Yes | Yes |
| S20  | Superficial injury of thorax                                                     | Yes | Yes |
| S200 | Contusion of breast                                                              | Yes | Yes |
| S201 | Other and unspecified superficial injuries of breast                             | Yes | Yes |
| S202 | Contusion of thorax                                                              | Yes | Yes |
| S203 | Other superficial injuries of front wall of thorax                               | Yes | Yes |
| S204 | Other superficial injuries of back wall of thorax                                | Yes | Yes |
| S207 | Multiple superficial injuries of thorax                                          | Yes | Yes |
| S208 | Superficial injury of other and unspecified parts of thorax                      | Yes | Yes |
| S21  | Open wound of thorax                                                             | Yes | Yes |
| S210 | Open wound of breast                                                             | Yes | Yes |
| S211 | Open wound of front wall of thorax                                               | Yes | Yes |
| S212 | Open wound of back wall of thorax                                                | Yes | Yes |
| S217 | Multiple open wounds of thoracic wall                                            | Yes | Yes |
| S218 | Open wound of other parts of thorax                                              | Yes | Yes |
| S219 | Open wound of thorax, part unspecified                                           | Yes | Yes |

|      |                                                                  |     |     |
|------|------------------------------------------------------------------|-----|-----|
| S22  | Fracture of rib(s), sternum and thoracic spine                   | Yes | Yes |
| S220 | Fracture of thoracic vertebra                                    | Yes | Yes |
| S221 | Multiple fractures of thoracic spine                             | Yes | Yes |
| S222 | Fracture of sternum                                              | Yes | Yes |
| S223 | Fracture of rib                                                  | Yes | Yes |
| S224 | Multiple fractures of ribs                                       | Yes | Yes |
| S225 | Flail chest                                                      | Yes | Yes |
| S228 | Fracture of other parts of bony thorax                           | Yes | Yes |
| S229 | Fracture of bony thorax, part unspecified                        | Yes | Yes |
| S23  | Dislocation, sprain and strain of joints and ligaments of thorax | Yes | Yes |
| S230 | Traumatic rupture of thoracic intervertebral disc                | Yes | Yes |
| S231 | Dislocation of thoracic vertebra                                 | Yes | Yes |
| S232 | Dislocation of other and unspecified parts of thorax             | Yes | Yes |
| S233 | Sprain and strain of thoracic spine                              | Yes | Yes |
| S234 | Sprain and strain of ribs and sternum                            | Yes | Yes |
| S235 | Sprain and strain of other and unspecified parts of thorax       | Yes | Yes |
| S24  | Injury of nerves and spinal cord at thorax level                 | Yes | Yes |
| S240 | Concussion and oedema of thoracic spinal cord                    | Yes | Yes |
| S241 | Other and unspecified injuries of thoracic spinal cord           | Yes | Yes |
| S242 | Injury of nerve root of thoracic spine                           | Yes | Yes |
| S243 | Injury of peripheral nerves of thorax                            | Yes | Yes |
| S244 | Injury of thoracic sympathetic nerves                            | Yes | Yes |
| S245 | Injury of other nerves of thorax                                 | Yes | Yes |
| S246 | Injury of unspecified nerve of thorax                            | Yes | Yes |
| S25  | Injury of blood vessels of thorax                                | Yes | Yes |
| S250 | Injury of thoracic aorta                                         | Yes | Yes |
| S251 | Injury of innominate or subclavian artery                        | Yes | Yes |
| S252 | Injury of superior vena cava                                     | Yes | Yes |
| S253 | Injury of innominate or subclavian vein                          | Yes | Yes |
| S254 | Injury of pulmonary blood vessels                                | Yes | Yes |
| S255 | Injury of intercostal blood vessels                              | Yes | Yes |
| S257 | Injury of multiple blood vessels of thorax                       | Yes | Yes |
| S258 | Injury of other blood vessels of thorax                          | Yes | Yes |
| S259 | Injury of unspecified blood vessel of thorax                     | Yes | Yes |
| S26  | Injury of heart                                                  | Yes | Yes |
| S260 | Injury of heart with haemopericardium                            | Yes | Yes |
| S268 | Other injuries of heart                                          | Yes | Yes |
| S269 | Injury of heart, unspecified                                     | Yes | Yes |
| S27  | Injury of other and unspecified intrathoracic organs             | Yes | Yes |
| S270 | Traumatic pneumothorax                                           | Yes | Yes |
| S271 | Traumatic haemothorax                                            | Yes | Yes |
| S272 | Traumatic haemopneumothorax                                      | Yes | Yes |
| S273 | Other injuries of lung                                           | Yes | Yes |
| S274 | Injury of bronchus                                               | Yes | Yes |
| S275 | Injury of thoracic trachea                                       | Yes | Yes |
| S276 | Injury of pleura                                                 | Yes | Yes |
| S277 | Multiple injuries of intrathoracic organs                        | Yes | Yes |
| S278 | Injury of other specified intrathoracic organs                   | Yes | Yes |
| S279 | Injury of unspecified intrathoracic organ                        | Yes | Yes |
| S28  | Crushing injury of thorax and traumatic amputation of part of t  | Yes | Yes |
| S280 | Crushed chest                                                    | Yes | Yes |
| S281 | Traumatic amputation of part of thorax                           | Yes | Yes |
| S29  | Other and unspecified injuries of thorax                         | Yes | Yes |

|      |                                                                                 |     |     |
|------|---------------------------------------------------------------------------------|-----|-----|
| S290 | Injury of muscle and tendon at thorax level                                     | Yes | Yes |
| S297 | Multiple injuries of thorax                                                     | Yes | Yes |
| S298 | Other specified injuries of thorax                                              | Yes | Yes |
| S299 | Unspecified injury of thorax                                                    | Yes | Yes |
| S30  | Superficial injury of abdomen, lower back and pelvis                            | Yes | Yes |
| S300 | Contusion of lower back and pelvis                                              | Yes | Yes |
| S301 | Contusion of abdominal wall                                                     | Yes | Yes |
| S302 | Contusion of external genital organs                                            | Yes | Yes |
| S307 | Multiple superficial injuries of abdomen, lower back and pelvis                 | Yes | Yes |
| S308 | Other superficial injuries of abdomen, lower back and pelvis                    | Yes | Yes |
| S309 | Superficial injury of abdomen, lower back and pelvis, part unsp                 | Yes | Yes |
| S31  | Open wound of abdomen, lower back and pelvis                                    | Yes | Yes |
| S310 | Open wound of lower back and pelvis                                             | Yes | Yes |
| S311 | Open wound of abdominal wall                                                    | Yes | Yes |
| S312 | Open wound of penis                                                             | Yes | Yes |
| S313 | Open wound of scrotum and testes                                                | Yes | Yes |
| S314 | Open wound of vagina and vulva                                                  | Yes | Yes |
| S315 | Open wound of other and unspecified external genital organs                     | Yes | Yes |
| S317 | Multiple open wounds of abdomen, lower back and pelvis                          | Yes | Yes |
| S318 | Open wound of other and unspecified parts of abdomen                            | Yes | Yes |
| S32  | Fracture of lumbar spine and pelvis                                             | Yes | Yes |
| S320 | Fracture of lumbar vertebra                                                     | Yes | Yes |
| S321 | Fracture of sacrum                                                              | Yes | Yes |
| S322 | Fracture of coccyx                                                              | Yes | Yes |
| S323 | Fracture of ilium                                                               | Yes | Yes |
| S324 | Fracture of acetabulum                                                          | Yes | Yes |
| S325 | Fracture of pubis                                                               | Yes | Yes |
| S327 | Multiple fractures of lumbar spine and pelvis                                   | Yes | Yes |
| S328 | Fracture of other and unspecified parts of lumbar spine and pelvis              | Yes | Yes |
| S33  | Dislocation, sprain and strain of joints and ligaments of lumbar spine          | Yes | Yes |
| S330 | Traumatic rupture of lumbar intervertebral disc                                 | Yes | Yes |
| S331 | Dislocation of lumbar vertebra                                                  | Yes | Yes |
| S332 | Dislocation of sacroiliac and sacrococcygeal joint                              | Yes | Yes |
| S333 | Dislocation of other and unspecified parts of lumbar spine and pelvis           | Yes | Yes |
| S334 | Traumatic rupture of symphysis pubis                                            | Yes | Yes |
| S335 | Sprain and strain of lumbar spine                                               | Yes | Yes |
| S336 | Sprain and strain of sacroiliac joint                                           | Yes | Yes |
| S337 | Sprain and strain of other and unspecified parts of lumbar spine and pelvis     | Yes | Yes |
| S34  | Injury of nerves and lumbar spinal cord at abdomen, lower back and pelvis level | Yes | Yes |
| S340 | Concussion and oedema of lumbar spinal cord                                     | Yes | Yes |
| S341 | Other injury of lumbar spinal cord                                              | Yes | Yes |
| S342 | Injury of nerve root of lumbar and sacral spine                                 | Yes | Yes |
| S343 | Injury of cauda equina                                                          | Yes | Yes |
| S344 | Injury of lumbosacral plexus                                                    | Yes | Yes |
| S345 | Injury of lumbar, sacral and pelvic sympathetic nerves                          | Yes | Yes |
| S346 | Injury of peripheral nerve(s) of abdomen, lower back and pelvis level           | Yes | Yes |
| S348 | Injury of other and unspecified nerves at abdomen, lower back and pelvis level  | Yes | Yes |
| S35  | Injury of blood vessels at abdomen, lower back and pelvis level                 | Yes | Yes |
| S350 | Injury of abdominal aorta                                                       | Yes | Yes |
| S351 | Injury of inferior vena cava                                                    | Yes | Yes |
| S352 | Injury of coeliac or mesenteric artery                                          | Yes | Yes |
| S353 | Injury of portal or splenic vein                                                | Yes | Yes |
| S354 | Injury of renal blood vessels                                                   | Yes | Yes |

|      |                                                                 |     |     |
|------|-----------------------------------------------------------------|-----|-----|
| S355 | Injury of iliac blood vessels                                   | Yes | Yes |
| S357 | Injury of multiple blood vessels at abdomen, lower back and pe  | Yes | Yes |
| S358 | Injury of other blood vessels at abdomen, lower back and pelvi: | Yes | Yes |
| S359 | Injury of unspecified blood vessel at abdomen, lower back and   | Yes | Yes |
| S36  | Injury of intra-abdominal organs                                | Yes | Yes |
| S360 | Injury of spleen                                                | Yes | Yes |
| S361 | Injury of liver or gallbladder                                  | Yes | Yes |
| S362 | Injury of pancreas                                              | Yes | Yes |
| S363 | Injury of stomach                                               | Yes | Yes |
| S364 | Injury of small intestine                                       | Yes | Yes |
| S365 | Injury of colon                                                 | Yes | Yes |
| S366 | Injury of rectum                                                | Yes | Yes |
| S367 | Injury of multiple intra-abdominal organs                       | Yes | Yes |
| S368 | Injury of other intra-abdominal organs                          | Yes | Yes |
| S369 | Injury of unspecified intra-abdominal organ                     | Yes | Yes |
| S37  | Injury of urinary and pelvic organs                             | Yes | Yes |
| S370 | Injury of kidney                                                | Yes | Yes |
| S371 | Injury of ureter                                                | Yes | Yes |
| S372 | Injury of bladder                                               | Yes | Yes |
| S373 | Injury of urethra                                               | Yes | Yes |
| S374 | Injury of ovary                                                 | Yes | Yes |
| S375 | Injury of fallopian tube                                        | Yes | Yes |
| S376 | Injury of uterus                                                | Yes | Yes |
| S377 | Injury of multiple pelvic organs                                | Yes | Yes |
| S378 | Injury of other pelvic organs                                   | Yes | Yes |
| S379 | Injury of unspecified pelvic organ                              | Yes | Yes |
| S38  | Crushing injury and traumatic amputation of part of abdomen,    | Yes | Yes |
| S380 | Crushing injury of external genital organs                      | Yes | Yes |
| S381 | Crushing injury of other and unspecified parts of abdomen, low  | Yes | Yes |
| S382 | Traumatic amputation of external genital organs                 | Yes | Yes |
| S383 | Traumatic amputation of other and unspecified parts of abdom    | Yes | Yes |
| S39  | Other and unspecified injuries of abdomen, lower back and pel   | Yes | Yes |
| S390 | Injury of muscle and tendon of abdomen, lower back and pelvis:  | Yes | Yes |
| S396 | Injury of intra-abdominal organ(s) with pelvic organ(s)         | Yes | Yes |
| S397 | Other multiple injuries of abdomen, lower back and pelvis       | Yes | Yes |
| S398 | Other specified injuries of abdomen, lower back and pelvis      | Yes | Yes |
| S399 | Unspecified injury of abdomen, lower back and pelvis            | Yes | Yes |
| S40  | Superficial injury of shoulder and upper arm                    | Yes | Yes |
| S400 | Contusion of shoulder and upper arm                             | Yes | Yes |
| S407 | Multiple superficial injuries of shoulder and upper arm         | Yes | Yes |
| S408 | Other superficial injuries of shoulder and upper arm            | Yes | Yes |
| S409 | Superficial injury of shoulder and upper arm, unspecified       | Yes | Yes |
| S41  | Open wound of shoulder and upper arm                            | Yes | Yes |
| S410 | Open wound of shoulder                                          | Yes | Yes |
| S411 | Open wound of upper arm                                         | Yes | Yes |
| S417 | Multiple open wounds of shoulder and upper arm                  | Yes | Yes |
| S418 | Open wound of other and unspecified parts of shoulder girdle    | Yes | Yes |
| S42  | Fracture of shoulder and upper arm                              | Yes | Yes |
| S420 | Fracture of clavicle                                            | Yes | Yes |
| S421 | Fracture of scapula                                             | Yes | Yes |
| S422 | Fracture of upper end of humerus                                | Yes | Yes |
| S423 | Fracture of shaft of humerus                                    | Yes | Yes |
| S424 | Fracture of lower end of humerus                                | Yes | Yes |

|      |                                                                         |     |     |
|------|-------------------------------------------------------------------------|-----|-----|
| S427 | Multiple fractures of clavicle, scapula and humerus                     | Yes | Yes |
| S428 | Fracture of other parts of shoulder and upper arm                       | Yes | Yes |
| S429 | Fracture of shoulder girdle, part unspecified                           | Yes | Yes |
| S43  | Dislocation, sprain and strain of joints and ligaments of shoulder      | Yes | Yes |
| S430 | Dislocation of shoulder joint                                           | Yes | Yes |
| S431 | Dislocation of acromioclavicular joint                                  | Yes | Yes |
| S432 | Dislocation of sternoclavicular joint                                   | Yes | Yes |
| S433 | Dislocation of other and unspecified parts of shoulder girdle           | Yes | Yes |
| S434 | Sprain and strain of shoulder joint                                     | Yes | Yes |
| S435 | Sprain and strain of acromioclavicular joint                            | Yes | Yes |
| S436 | Sprain and strain of sternoclavicular joint                             | Yes | Yes |
| S437 | Sprain and strain of other and unspecified parts of shoulder girdle     | Yes | Yes |
| S44  | Injury of nerves at shoulder and upper arm level                        | Yes | Yes |
| S440 | Injury of ulnar nerve at upper arm level                                | Yes | Yes |
| S441 | Injury of median nerve at upper arm level                               | Yes | Yes |
| S442 | Injury of radial nerve at upper arm level                               | Yes | Yes |
| S443 | Injury of axillary nerve                                                | Yes | Yes |
| S444 | Injury of musculocutaneous nerve                                        | Yes | Yes |
| S445 | Injury of cutaneous sensory nerve at shoulder and upper arm level       | Yes | Yes |
| S447 | Injury of multiple nerves at shoulder and upper arm level               | Yes | Yes |
| S448 | Injury of other nerves at shoulder and upper arm level                  | Yes | Yes |
| S449 | Injury of unspecified nerve at shoulder and upper arm level             | Yes | Yes |
| S45  | Injury of blood vessels at shoulder and upper arm level                 | Yes | Yes |
| S450 | Injury of axillary artery                                               | Yes | Yes |
| S451 | Injury of brachial artery                                               | Yes | Yes |
| S452 | Injury of axillary or brachial vein                                     | Yes | Yes |
| S453 | Injury of superficial vein at shoulder and upper arm level              | Yes | Yes |
| S457 | Injury of multiple blood vessels at shoulder and upper arm level        | Yes | Yes |
| S458 | Injury of other blood vessels at shoulder and upper arm level           | Yes | Yes |
| S459 | Injury of unspecified blood vessel at shoulder and upper arm level      | Yes | Yes |
| S46  | Injury of muscle and tendon at shoulder and upper arm level             | Yes | Yes |
| S460 | Injury of muscle(s) and tendon(s) of the rotator cuff of shoulder       | Yes | Yes |
| S461 | Injury of muscle and tendon of long head of biceps                      | Yes | Yes |
| S462 | Injury of muscle and tendon of other parts of biceps                    | Yes | Yes |
| S463 | Injury of muscle and tendon of triceps                                  | Yes | Yes |
| S467 | Injury of multiple muscles and tendons at shoulder and upper arm level  | Yes | Yes |
| S468 | Injury of other muscles and tendons at shoulder and upper arm level     | Yes | Yes |
| S469 | Injury of unspecified muscle and tendon at shoulder and upper arm level | Yes | Yes |
| S47X | Crushing injury of shoulder and upper arm                               | Yes | Yes |
| S48  | Traumatic amputation of shoulder and upper arm                          | Yes | Yes |
| S480 | Traumatic amputation at shoulder joint                                  | Yes | Yes |
| S481 | Traumatic amputation at level between shoulder and elbow                | Yes | Yes |
| S489 | Traumatic amputation of shoulder and upper arm, level unspecified       | Yes | Yes |
| S49  | Other and unspecified injuries of shoulder and upper arm                | Yes | Yes |
| S497 | Multiple injuries of shoulder and upper arm                             | Yes | Yes |
| S498 | Other specified injuries of shoulder and upper arm                      | Yes | Yes |
| S499 | Unspecified injury of shoulder and upper arm                            | Yes | Yes |
| S50  | Superficial injury of forearm                                           | Yes | Yes |
| S500 | Contusion of elbow                                                      | Yes | Yes |
| S501 | Contusion of other and unspecified parts of forearm                     | Yes | Yes |
| S507 | Multiple superficial injuries of forearm                                | Yes | Yes |
| S508 | Other superficial injuries of forearm                                   | Yes | Yes |
| S509 | Superficial injury of forearm, unspecified                              | Yes | Yes |



|      |                                                                              |     |     |
|------|------------------------------------------------------------------------------|-----|-----|
| S51  | Open wound of forearm                                                        | Yes | Yes |
| S510 | Open wound of elbow                                                          | Yes | Yes |
| S517 | Multiple open wounds of forearm                                              | Yes | Yes |
| S518 | Open wound of other parts of forearm                                         | Yes | Yes |
| S519 | Open wound of forearm, part unspecified                                      | Yes | Yes |
| S52  | Fracture of forearm                                                          | Yes | Yes |
| S520 | Fracture of upper end of ulna                                                | Yes | Yes |
| S521 | Fracture of upper end of radius                                              | Yes | Yes |
| S522 | Fracture of shaft of ulna                                                    | Yes | Yes |
| S523 | Fracture of shaft of radius                                                  | Yes | Yes |
| S524 | Fracture of shafts of both ulna and radius                                   | Yes | Yes |
| S525 | Fracture of lower end of radius                                              | Yes | Yes |
| S526 | Fracture of lower end of both ulna and radius                                | Yes | Yes |
| S527 | Multiple fractures of forearm                                                | Yes | Yes |
| S528 | Fracture of other parts of forearm                                           | Yes | Yes |
| S529 | Fracture of forearm, part unspecified                                        | Yes | Yes |
| S53  | Dislocation, sprain and strain of joints and ligaments of elbow              | Yes | Yes |
| S530 | Dislocation of radial head                                                   | Yes | Yes |
| S531 | Dislocation of elbow, unspecified                                            | Yes | Yes |
| S532 | Traumatic rupture of radial collateral ligament                              | Yes | Yes |
| S533 | Traumatic rupture of ulnar collateral ligament                               | Yes | Yes |
| S534 | Sprain and strain of elbow                                                   | Yes | Yes |
| S54  | Injury of nerves at forearm level                                            | Yes | Yes |
| S540 | Injury of ulnar nerve at forearm level                                       | Yes | Yes |
| S541 | Injury of median nerve at forearm level                                      | Yes | Yes |
| S542 | Injury of radial nerve at forearm level                                      | Yes | Yes |
| S543 | Injury of cutaneous sensory nerve at forearm level                           | Yes | Yes |
| S547 | Injury of multiple nerves at forearm level                                   | Yes | Yes |
| S548 | Injury of other nerves at forearm level                                      | Yes | Yes |
| S549 | Injury of unspecified nerve at forearm level                                 | Yes | Yes |
| S55  | Injury of blood vessels at forearm level                                     | Yes | Yes |
| S550 | Injury of ulnar artery at forearm level                                      | Yes | Yes |
| S551 | Injury of radial artery at forearm level                                     | Yes | Yes |
| S552 | Injury of vein at forearm level                                              | Yes | Yes |
| S557 | Injury of multiple blood vessels at forearm level                            | Yes | Yes |
| S558 | Injury of other blood vessels at forearm level                               | Yes | Yes |
| S559 | Injury of unspecified blood vessel at forearm level                          | Yes | Yes |
| S56  | Injury of muscle and tendon at forearm level                                 | Yes | Yes |
| S560 | Injury of flexor muscle and tendon of thumb at forearm level                 | Yes | Yes |
| S561 | Injury of long flexor muscle and tendon of other finger(s) at forearm level  | Yes | Yes |
| S562 | Injury of other flexor muscle and tendon at forearm level                    | Yes | Yes |
| S563 | Injury of extensor or abductor muscles and tendons of thumb at forearm level | Yes | Yes |
| S564 | Injury of extensor muscle and tendon of other finger(s) at forearm level     | Yes | Yes |
| S565 | Injury of other extensor muscle and tendon at forearm level                  | Yes | Yes |
| S567 | Injury of multiple muscles and tendons at forearm level                      | Yes | Yes |
| S568 | Injury of other and unspecified muscles and tendons at forearm level         | Yes | Yes |
| S57  | Crushing injury of forearm                                                   | Yes | Yes |
| S570 | Crushing injury of elbow                                                     | Yes | Yes |
| S578 | Crushing injury of other parts of forearm                                    | Yes | Yes |
| S579 | Crushing injury of forearm, part unspecified                                 | Yes | Yes |
| S58  | Traumatic amputation of forearm                                              | Yes | Yes |
| S580 | Traumatic amputation at elbow level                                          | Yes | Yes |
| S581 | Traumatic amputation at level between elbow and wrist                        | Yes | Yes |



|      |                                                                    |     |     |
|------|--------------------------------------------------------------------|-----|-----|
| S589 | Traumatic amputation of forearm, level unspecified                 | Yes | Yes |
| S59  | Other and unspecified injuries of forearm                          | Yes | Yes |
| S597 | Multiple injuries of forearm                                       | Yes | Yes |
| S598 | Other specified injuries of forearm                                | Yes | Yes |
| S599 | Unspecified injury of forearm                                      | Yes | Yes |
| S60  | Superficial injury of wrist and hand                               | Yes | Yes |
| S600 | Contusion of finger(s) without damage to nail                      | Yes | Yes |
| S601 | Contusion of finger(s) with damage to nail                         | Yes | Yes |
| S602 | Contusion of other parts of wrist and hand                         | Yes | Yes |
| S607 | Multiple superficial injuries of wrist and hand                    | Yes | Yes |
| S608 | Other superficial injuries of wrist and hand                       | Yes | Yes |
| S609 | Superficial injury of wrist and hand, unspecified                  | Yes | Yes |
| S61  | Open wound of wrist and hand                                       | Yes | Yes |
| S610 | Open wound of finger(s) without damage to nail                     | Yes | Yes |
| S611 | Open wound of finger(s) with damage to nail                        | Yes | Yes |
| S617 | Multiple open wounds of wrist and hand                             | Yes | Yes |
| S618 | Open wound of other parts of wrist and hand                        | Yes | Yes |
| S619 | Open wound of wrist and hand part, part unspecified                | Yes | Yes |
| S62  | Fracture at wrist and hand level                                   | Yes | Yes |
| S620 | Fracture of navicular [scaphoid] bone of hand                      | Yes | Yes |
| S621 | Fracture of other carpal bone(s)                                   | Yes | Yes |
| S622 | Fracture of first metacarpal bone                                  | Yes | Yes |
| S623 | Fracture of other metacarpal bone                                  | Yes | Yes |
| S624 | Multiple fractures of metacarpal bones                             | Yes | Yes |
| S625 | Fracture of thumb                                                  | Yes | Yes |
| S626 | Fracture of other finger                                           | Yes | Yes |
| S627 | Multiple fractures of fingers                                      | Yes | Yes |
| S628 | Fracture of other and unspecified parts of wrist and hand          | Yes | Yes |
| S63  | Dislocation, sprain and strain of joints and ligaments at wrist ar | Yes | Yes |
| S630 | Dislocation of wrist                                               | Yes | Yes |
| S631 | Dislocation of finger                                              | Yes | Yes |
| S632 | Multiple dislocations of fingers                                   | Yes | Yes |
| S633 | Traumatic rupture of ligament of wrist and carpus                  | Yes | Yes |
| S634 | Traumatic rupture of ligament of finger at metacarpophalange:      | Yes | Yes |
| S635 | Sprain and strain of wrist                                         | Yes | Yes |
| S636 | Sprain and strain of finger(s)                                     | Yes | Yes |
| S637 | Sprain and strain of other and unspecified parts of hand           | Yes | Yes |
| S64  | Injury of nerves at wrist and hand level                           | Yes | Yes |
| S640 | Injury of ulnar nerve at wrist and hand level                      | Yes | Yes |
| S641 | Injury of median nerve at wrist and hand level                     | Yes | Yes |
| S642 | Injury of radial nerve at wrist and hand level                     | Yes | Yes |
| S643 | Injury of digital nerve of thumb                                   | Yes | Yes |
| S644 | Injury of digital nerve of other finger                            | Yes | Yes |
| S647 | Injury of multiple nerves at wrist and hand level                  | Yes | Yes |
| S648 | Injury of other nerves at wrist and hand level                     | Yes | Yes |
| S649 | Injury of unspecified nerve at wrist and hand level                | Yes | Yes |
| S65  | Injury of blood vessels at wrist and hand level                    | Yes | Yes |
| S650 | Injury of ulnar artery at wrist and hand level                     | Yes | Yes |
| S651 | Injury of radial artery at wrist and hand level                    | Yes | Yes |
| S652 | Injury of superficial palmar arch                                  | Yes | Yes |
| S653 | Injury of deep palmar arch                                         | Yes | Yes |
| S654 | Injury of blood vessel(s) of thumb                                 | Yes | Yes |
| S655 | Injury of blood vessel(s) of other finger                          | Yes | Yes |

|      |                                                                               |     |     |
|------|-------------------------------------------------------------------------------|-----|-----|
| S657 | Injury of multiple blood vessels at wrist and hand level                      | Yes | Yes |
| S658 | Injury of other blood vessels at wrist and hand level                         | Yes | Yes |
| S659 | Injury of unspecified blood vessel at wrist and hand level                    | Yes | Yes |
| S66  | Injury of muscle and tendon at wrist and hand level                           | Yes | Yes |
| S660 | Injury of long flexor muscle and tendon of thumb at wrist and hand level      | Yes | Yes |
| S661 | Injury of flexor muscle and tendon of other finger at wrist and hand level    | Yes | Yes |
| S662 | Injury of extensor muscle and tendon of thumb at wrist and hand level         | Yes | Yes |
| S663 | Injury of extensor muscle and tendon of other finger at wrist and hand level  | Yes | Yes |
| S664 | Injury of intrinsic muscle and tendon of thumb at wrist and hand level        | Yes | Yes |
| S665 | Injury of intrinsic muscle and tendon of other finger at wrist and hand level | Yes | Yes |
| S666 | Injury of multiple flexor muscles and tendons at wrist and hand level         | Yes | Yes |
| S667 | Injury of multiple extensor muscles and tendons at wrist and hand level       | Yes | Yes |
| S668 | Injury of other muscles and tendons at wrist and hand level                   | Yes | Yes |
| S669 | Injury of unspecified muscle and tendon at wrist and hand level               | Yes | Yes |
| S67  | Crushing injury of wrist and hand                                             | Yes | Yes |
| S670 | Crushing injury of thumb and other finger(s)                                  | Yes | Yes |
| S678 | Crushing injury of other and unspecified parts of wrist and hand              | Yes | Yes |
| S68  | Traumatic amputation of wrist and hand                                        | Yes | Yes |
| S680 | Traumatic amputation of thumb (complete)(partial)                             | Yes | Yes |
| S681 | Traumatic amputation of other single finger (complete)(partial)               | Yes | Yes |
| S682 | Traumatic amputation of two or more fingers alone (complete)                  | Yes | Yes |
| S683 | Combined traumatic amputation of (part of) finger(s) with other parts         | Yes | Yes |
| S684 | Traumatic amputation of hand at wrist level                                   | Yes | Yes |
| S688 | Traumatic amputation of other parts of wrist and hand                         | Yes | Yes |
| S689 | Traumatic amputation of wrist and hand, level unspecified                     | Yes | Yes |
| S69  | Other and unspecified injuries of wrist and hand                              | Yes | Yes |
| S697 | Multiple injuries of wrist and hand                                           | Yes | Yes |
| S698 | Other specified injuries of wrist and hand                                    | Yes | Yes |
| S699 | Unspecified injury of wrist and hand                                          | Yes | Yes |
| S70  | Superficial injury of hip and thigh                                           | Yes | Yes |
| S700 | Contusion of hip                                                              | Yes | Yes |
| S701 | Contusion of thigh                                                            | Yes | Yes |
| S707 | Multiple superficial injuries of hip and thigh                                | Yes | Yes |
| S708 | Other superficial injuries of hip and thigh                                   | Yes | Yes |
| S709 | Superficial injury of hip and thigh, unspecified                              | Yes | Yes |
| S71  | Open wound of hip and thigh                                                   | Yes | Yes |
| S710 | Open wound of hip                                                             | Yes | Yes |
| S711 | Open wound of thigh                                                           | Yes | Yes |
| S717 | Multiple open wounds of hip and thigh                                         | Yes | Yes |
| S718 | Open wound of other and unspecified parts of pelvic girdle                    | Yes | Yes |
| S72  | Fracture of femur                                                             | Yes | Yes |
| S720 | Fracture of neck of femur                                                     | Yes | Yes |
| S721 | Pertrochanteric fracture                                                      | Yes | Yes |
| S722 | Subtrochanteric fracture                                                      | Yes | Yes |
| S723 | Fracture of shaft of femur                                                    | Yes | Yes |
| S724 | Fracture of lower end of femur                                                | Yes | Yes |
| S727 | Multiple fractures of femur                                                   | Yes | Yes |
| S728 | Fractures of other parts of femur                                             | Yes | Yes |
| S729 | Fracture of femur, part unspecified                                           | Yes | Yes |
| S73  | Dislocation, sprain and strain of joint and ligaments of hip                  | Yes | Yes |
| S730 | Dislocation of hip                                                            | Yes | Yes |
| S731 | Sprain and strain of hip                                                      | Yes | Yes |
| S74  | Injury of nerves at hip and thigh level                                       | Yes | Yes |

|      |                                                                          |     |     |
|------|--------------------------------------------------------------------------|-----|-----|
| S740 | Injury of sciatic nerve at hip and thigh level                           | Yes | Yes |
| S741 | Injury of femoral nerve at hip and thigh level                           | Yes | Yes |
| S742 | Injury of cutaneous sensory nerve at hip and thigh level                 | Yes | Yes |
| S747 | Injury of multiple nerves at hip and thigh level                         | Yes | Yes |
| S748 | Injury of other nerves at hip and thigh level                            | Yes | Yes |
| S749 | Injury of unspecified nerve at hip and thigh level                       | Yes | Yes |
| S75  | Injury of blood vessels at hip and thigh level                           | Yes | Yes |
| S750 | Injury of femoral artery                                                 | Yes | Yes |
| S751 | Injury of femoral vein at hip and thigh level                            | Yes | Yes |
| S752 | Injury of greater saphenous vein at hip and thigh level                  | Yes | Yes |
| S757 | Injury of multiple blood vessels at hip and thigh level                  | Yes | Yes |
| S758 | Injury of other blood vessels at hip and thigh level                     | Yes | Yes |
| S759 | Injury of unspecified blood vessel at hip and thigh level                | Yes | Yes |
| S76  | Injury of muscle and tendon at hip and thigh level                       | Yes | Yes |
| S760 | Injury of muscle and tendon of hip                                       | Yes | Yes |
| S761 | Injury of quadriceps muscle and tendon                                   | Yes | Yes |
| S762 | Injury of adductor muscle and tendon of thigh                            | Yes | Yes |
| S763 | Injury of muscle and tendon of the posterior muscle group at thigh level | Yes | Yes |
| S764 | Injury of other and unspecified muscles and tendons at thigh level       | Yes | Yes |
| S767 | Injury of multiple muscles and tendons at hip and thigh level            | Yes | Yes |
| S77  | Crushing injury of hip and thigh                                         | Yes | Yes |
| S770 | Crushing injury of hip                                                   | Yes | Yes |
| S771 | Crushing injury of thigh                                                 | Yes | Yes |
| S772 | Crushing injury of hip with thigh                                        | Yes | Yes |
| S78  | Traumatic amputation of hip and thigh                                    | Yes | Yes |
| S780 | Traumatic amputation at hip joint                                        | Yes | Yes |
| S781 | Traumatic amputation at level between hip and knee                       | Yes | Yes |
| S789 | Traumatic amputation of hip and thigh, level unspecified                 | Yes | Yes |
| S79  | Other and specified injuries of hip and thigh                            | Yes | Yes |
| S797 | Multiple injuries of hip and thigh                                       | Yes | Yes |
| S798 | Other specified injuries of hip and thigh                                | Yes | Yes |
| S799 | Unspecified injury of hip and thigh                                      | Yes | Yes |
| S80  | Superficial injury of lower leg                                          | Yes | Yes |
| S800 | Contusion of knee                                                        | Yes | Yes |
| S801 | Contusion of other and unspecified parts of lower leg                    | Yes | Yes |
| S807 | Multiple superficial injuries of lower leg                               | Yes | Yes |
| S808 | Other superficial injuries of lower leg                                  | Yes | Yes |
| S809 | Superficial injury of lower leg, unspecified                             | Yes | Yes |
| S81  | Open wound of lower leg                                                  | Yes | Yes |
| S810 | Open wound of knee                                                       | Yes | Yes |
| S817 | Multiple open wounds of lower leg                                        | Yes | Yes |
| S818 | Open wound of other parts of lower leg                                   | Yes | Yes |
| S819 | Open wound of lower leg, part unspecified                                | Yes | Yes |
| S82  | Fracture of lower leg, including ankle                                   | Yes | Yes |
| S820 | Fracture of patella                                                      | Yes | Yes |
| S821 | Fracture of upper end of tibia                                           | Yes | Yes |
| S822 | Fracture of shaft of tibia                                               | Yes | Yes |
| S823 | Fracture of lower end of tibia                                           | Yes | Yes |
| S824 | Fracture of fibula alone                                                 | Yes | Yes |
| S825 | Fracture of medial malleolus                                             | Yes | Yes |
| S826 | Fracture of lateral malleolus                                            | Yes | Yes |
| S827 | Multiple fractures of lower leg                                          | Yes | Yes |
| S828 | Fractures of other parts of lower leg                                    | Yes | Yes |

|      |                                                                      |     |     |
|------|----------------------------------------------------------------------|-----|-----|
| S829 | Fracture of lower leg, part unspecified                              | Yes | Yes |
| S83  | Dislocation, sprain and strain of joints and ligaments of knee       | Yes | Yes |
| S830 | Dislocation of patella                                               | Yes | Yes |
| S831 | Dislocation of knee                                                  | Yes | Yes |
| S832 | Tear of meniscus, current                                            | Yes | Yes |
| S833 | Tear of articular cartilage of knee, current                         | Yes | Yes |
| S834 | Sprain and strain involving (fibular)(tibial) collateral ligament of | Yes | Yes |
| S835 | Sprain and strain involving (anterior)(posterior) cruciate ligame    | Yes | Yes |
| S836 | Sprain and strain of other and unspecified parts of knee             | Yes | Yes |
| S837 | Injury to multiple structures of knee                                | Yes | Yes |
| S84  | Injury of nerves at lower leg level                                  | Yes | Yes |
| S840 | Injury of tibial nerve at lower leg level                            | Yes | Yes |
| S841 | Injury of peroneal nerve at lower leg level                          | Yes | Yes |
| S842 | Injury of cutaneous sensory nerve at lower leg level                 | Yes | Yes |
| S847 | Injury of multiple nerves at lower leg level                         | Yes | Yes |
| S848 | Injury of other nerves at lower leg level                            | Yes | Yes |
| S849 | Injury of unspecified nerve at lower leg level                       | Yes | Yes |
| S85  | Injury of blood vessels at lower leg level                           | Yes | Yes |
| S850 | Injury of popliteal artery                                           | Yes | Yes |
| S851 | Injury of (anterior)(posterior) tibial artery                        | Yes | Yes |
| S852 | Injury of peroneal artery                                            | Yes | Yes |
| S853 | Injury of greater saphenous vein at lower leg level                  | Yes | Yes |
| S854 | Injury of lesser saphenous vein at lower leg level                   | Yes | Yes |
| S855 | Injury of popliteal vein                                             | Yes | Yes |
| S857 | Injury of multiple blood vessels at lower leg level                  | Yes | Yes |
| S858 | Injury of other blood vessels at lower leg level                     | Yes | Yes |
| S859 | Injury of unspecified blood vessel at lower leg level                | Yes | Yes |
| S86  | Injury of muscle and tendon at lower leg level                       | Yes | Yes |
| S860 | Injury of Achilles tendon                                            | Yes | Yes |
| S861 | Injury of other muscle(s) and tendon(s) of posterior muscle gro      | Yes | Yes |
| S862 | Injury of muscle(s) and tendon(s) of anterior muscle group at lc     | Yes | Yes |
| S863 | Injury of muscle(s) and tendon(s) of peroneal muscle group at l      | Yes | Yes |
| S867 | Injury of multiple muscles and tendons at lower leg level            | Yes | Yes |
| S868 | Injury of other muscles and tendons at lower leg level               | Yes | Yes |
| S869 | Injury of unspecified muscle and tendon at lower leg level           | Yes | Yes |
| S87  | Crushing injury of lower leg                                         | Yes | Yes |
| S870 | Crushing injury of knee                                              | Yes | Yes |
| S878 | Crushing injury of other and unspecified parts of lower leg          | Yes | Yes |
| S88  | Traumatic amputation of lower leg                                    | Yes | Yes |
| S880 | Traumatic amputation at knee level                                   | Yes | Yes |
| S881 | Traumatic amputation at level between knee and ankle                 | Yes | Yes |
| S889 | Traumatic amputation of lower leg, level unspecified                 | Yes | Yes |
| S89  | Other and unspecified injuries of lower leg                          | Yes | Yes |
| S897 | Multiple injuries of lower leg                                       | Yes | Yes |
| S898 | Other specified injuries of lower leg                                | Yes | Yes |
| S899 | Unspecified injury of lower leg                                      | Yes | Yes |
| S90  | Superficial injury of ankle and foot                                 | Yes | Yes |
| S900 | Contusion of ankle                                                   | Yes | Yes |
| S901 | Contusion of toe(s) without damage to nail                           | Yes | Yes |
| S902 | Contusion of toe(s) with damage to nail                              | Yes | Yes |
| S903 | Contusion of other and unspecified parts of foot                     | Yes | Yes |
| S907 | Multiple superficial injuries of ankle and foot                      | Yes | Yes |
| S908 | Other superficial injuries of ankle and foot                         | Yes | Yes |

|      |                                                                                    |     |     |
|------|------------------------------------------------------------------------------------|-----|-----|
| S909 | Superficial injury of ankle and foot, unspecified                                  | Yes | Yes |
| S91  | Open wound of ankle and foot                                                       | Yes | Yes |
| S910 | Open wound of ankle                                                                | Yes | Yes |
| S911 | Open wound of toe(s) without damage to nail                                        | Yes | Yes |
| S912 | Open wound of toe(s) with damage to nail                                           | Yes | Yes |
| S913 | Open wound of other parts of foot                                                  | Yes | Yes |
| S917 | Multiple open wounds of ankle and foot                                             | Yes | Yes |
| S92  | Fracture of foot, except ankle                                                     | Yes | Yes |
| S920 | Fracture of calcaneus                                                              | Yes | Yes |
| S921 | Fracture of talus                                                                  | Yes | Yes |
| S922 | Fracture of other tarsal bone(s)                                                   | Yes | Yes |
| S923 | Fracture of metatarsal bone                                                        | Yes | Yes |
| S924 | Fracture of great toe                                                              | Yes | Yes |
| S925 | Fracture of other toe                                                              | Yes | Yes |
| S927 | Multiple fractures of foot                                                         | Yes | Yes |
| S929 | Fracture of foot, unspecified                                                      | Yes | Yes |
| S93  | Dislocation, sprain and strain of joints and ligaments at ankle and foot level     | Yes | Yes |
| S930 | Dislocation of ankle joint                                                         | Yes | Yes |
| S931 | Dislocation of toe(s)                                                              | Yes | Yes |
| S932 | Rupture of ligaments at ankle and foot level                                       | Yes | Yes |
| S933 | Dislocation of other and unspecified parts of foot                                 | Yes | Yes |
| S934 | Sprain and strain of ankle                                                         | Yes | Yes |
| S935 | Sprain and strain of toe(s)                                                        | Yes | Yes |
| S936 | Sprain and strain of other and unspecified parts of foot                           | Yes | Yes |
| S94  | Injury of nerves at ankle and foot level                                           | Yes | Yes |
| S940 | Injury of lateral plantar nerve                                                    | Yes | Yes |
| S941 | Injury of medial plantar nerve                                                     | Yes | Yes |
| S942 | Injury of deep peroneal nerve at ankle and foot level                              | Yes | Yes |
| S943 | Injury of cutaneous sensory nerve at ankle and foot level                          | Yes | Yes |
| S947 | Injury of multiple nerves at ankle and foot level                                  | Yes | Yes |
| S948 | Injury of other nerves at ankle and foot level                                     | Yes | Yes |
| S949 | Injury of unspecified nerve at ankle and foot level                                | Yes | Yes |
| S95  | Injury of blood vessels at ankle and foot level                                    | Yes | Yes |
| S950 | Injury of dorsal artery of foot                                                    | Yes | Yes |
| S951 | Injury of plantar artery of foot                                                   | Yes | Yes |
| S952 | Injury of dorsal vein of foot                                                      | Yes | Yes |
| S957 | Injury of multiple blood vessels at ankle and foot level                           | Yes | Yes |
| S958 | Injury of other blood vessels at ankle and foot level                              | Yes | Yes |
| S959 | Injury of unspecified blood vessel at ankle and foot level                         | Yes | Yes |
| S96  | Injury of muscle and tendon at ankle and foot level                                | Yes | Yes |
| S960 | Injury of muscle and tendon of long flexor muscle of toe at ankle and foot level   | Yes | Yes |
| S961 | Injury of muscle and tendon of long extensor muscle of toe at ankle and foot level | Yes | Yes |
| S962 | Injury of intrinsic muscle and tendon at ankle and foot level                      | Yes | Yes |
| S967 | Injury of multiple muscles and tendons at ankle and foot level                     | Yes | Yes |
| S968 | Injury of other muscles and tendons at ankle and foot level                        | Yes | Yes |
| S969 | Injury of unspecified muscle and tendon at ankle and foot level                    | Yes | Yes |
| S97  | Crushing injury of ankle and foot                                                  | Yes | Yes |
| S970 | Crushing injury of ankle                                                           | Yes | Yes |
| S971 | Crushing injury of toe(s)                                                          | Yes | Yes |
| S978 | Crushing injury of other parts of ankle and foot                                   | Yes | Yes |
| S98  | Traumatic amputation of ankle and foot                                             | Yes | Yes |
| S980 | Traumatic amputation of foot at ankle level                                        | Yes | Yes |
| S981 | Traumatic amputation of one toe                                                    | Yes | Yes |

|      |                                                                    |     |     |
|------|--------------------------------------------------------------------|-----|-----|
| S982 | Traumatic amputation of two or more toes                           | Yes | Yes |
| S983 | Traumatic amputation of other parts of foot                        | Yes | Yes |
| S984 | Traumatic amputation of foot, level unspecified                    | Yes | Yes |
| S99  | Other and unspecified injuries of ankle and foot                   | Yes | Yes |
| S997 | Multiple injuries of ankle and foot                                | Yes | Yes |
| S998 | Other specified injuries of ankle and foot                         | Yes | Yes |
| S999 | Unspecified injury of ankle and foot                               | Yes | Yes |
| T00  | Superficial injuries involving multiple body regions               | Yes | Yes |
| T000 | Superficial injuries involving head with neck                      | Yes | Yes |
| T001 | Superficial injuries involving thorax with abdomen, lower back     | Yes | Yes |
| T002 | Superficial injuries involving multiple regions of upper limb(s)   | Yes | Yes |
| T003 | Superficial injuries involving multiple regions of lower limb(s)   | Yes | Yes |
| T006 | Superficial injuries involving multiple regions of upper limb(s) w | Yes | Yes |
| T008 | Superficial injuries involving other combinations of body region   | Yes | Yes |
| T009 | Multiple superficial injuries, unspecified                         | Yes | Yes |
| T01  | Open wounds involving multiple body regions                        | Yes | Yes |
| T010 | Open wounds involving head with neck                               | Yes | Yes |
| T011 | Open wounds involving thorax with abdomen, lower back and          | Yes | Yes |
| T012 | Open wounds involving multiple regions of upper limb(s)            | Yes | Yes |
| T013 | Open wounds involving multiple regions of lower limb(s)            | Yes | Yes |
| T016 | Open wounds involving multiple regions of upper limb(s) with       | Yes | Yes |
| T018 | Open wounds involving other combinations of body regions           | Yes | Yes |
| T019 | Multiple open wounds, unspecified                                  | Yes | Yes |
| T02  | Fractures involving multiple body regions                          | Yes | Yes |
| T020 | Fractures involving head with neck                                 | Yes | Yes |
| T021 | Fractures involving thorax with lower back and pelvis              | Yes | Yes |
| T022 | Fractures involving multiple regions of one upper limb             | Yes | Yes |
| T023 | Fractures involving multiple regions of one lower limb             | Yes | Yes |
| T024 | Fractures involving multiple regions of both upper limbs           | Yes | Yes |
| T025 | Fractures involving multiple regions of both lower limbs           | Yes | Yes |
| T026 | Fractures involving multiple regions of upper limb(s) with lowe    | Yes | Yes |
| T027 | Fractures involving thorax with lower back and pelvis with limb    | Yes | Yes |
| T028 | Fractures involving other combinations of body regions             | Yes | Yes |
| T029 | Multiple fractures, unspecified                                    | Yes | Yes |
| T03  | Dislocations, sprains and strains involving multiple body region   | Yes | Yes |
| T030 | Dislocations, sprains and strains involving head with neck         | Yes | Yes |
| T031 | Dislocations, sprains and strains involving thorax with lower ba   | Yes | Yes |
| T032 | Dislocations, sprains and strains involving multiple regions of u  | Yes | Yes |
| T033 | Dislocations, sprains and strains involving multiple regions of l  | Yes | Yes |
| T034 | Dislocations, sprains and strains involving multiple regions of u  | Yes | Yes |
| T038 | Dislocations, sprains and strains involving other combinations     | Yes | Yes |
| T039 | Multiple dislocations, sprains and strains, unspecified            | Yes | Yes |
| T04  | Crushing injuries involving multiple body regions                  | Yes | Yes |
| T040 | Crushing injuries involving head with neck                         | Yes | Yes |
| T041 | Crushing injuries involving thorax with abdomen, lower back ar     | Yes | Yes |
| T042 | Crushing injuries involving multiple regions of upper limb(s)      | Yes | Yes |
| T043 | Crushing injuries involving multiple regions of lower limb(s)      | Yes | Yes |
| T044 | Crushing injuries involving multiple regions of upper limb(s) wit  | Yes | Yes |
| T047 | Crushing injuries of thorax with abdomen, lower back and pelvi     | Yes | Yes |
| T048 | Crushing injuries involving other combinations of body regions     | Yes | Yes |
| T049 | Multiple crushing injuries, unspecified                            | Yes | Yes |
| T05  | Traumatic amputations involving multiple body regions              | Yes | Yes |
| T050 | Traumatic amputation of both hands                                 | Yes | Yes |

|      |                                                                              |     |     |
|------|------------------------------------------------------------------------------|-----|-----|
| T051 | Traumatic amputation of one hand and other arm [any level, except]           | Yes | Yes |
| T052 | Traumatic amputation of both arms [any level]                                | Yes | Yes |
| T053 | Traumatic amputation of both feet                                            | Yes | Yes |
| T054 | Traumatic amputation of one foot and other leg [any level, except]           | Yes | Yes |
| T055 | Traumatic amputation of both legs [any level]                                | Yes | Yes |
| T056 | Traumatic amputation of upper and lower limbs, any combination               | Yes | Yes |
| T058 | Traumatic amputations involving other combinations of body regions           | Yes | Yes |
| T059 | Multiple traumatic amputations, unspecified                                  | Yes | Yes |
| T06  | Other injuries involving multiple body regions, not elsewhere classified     | Yes | Yes |
| T060 | Injuries of brain and cranial nerves with injuries of nerves and spinal cord | Yes | Yes |
| T061 | Injuries of nerves and spinal cord involving other multiple body regions     | Yes | Yes |
| T062 | Injuries of nerves involving multiple body regions                           | Yes | Yes |
| T063 | Injuries of blood vessels involving multiple body regions                    | Yes | Yes |
| T064 | Injuries of muscles and tendons involving multiple body regions              | Yes | Yes |
| T065 | Injuries of intrathoracic organs with intra-abdominal and pelvic injuries    | Yes | Yes |
| T068 | Other specified injuries involving multiple body regions                     | Yes | Yes |
| T07X | Unspecified multiple injuries                                                | Yes | Yes |
| T08X | Fracture of spine, level unspecified                                         | Yes | Yes |
| T080 | Fracture of spine, level unspecified                                         | Yes | Yes |
| T09  | Other injuries of spine and trunk, level unspecified                         | Yes | Yes |
| T090 | Superficial injury of trunk, level unspecified                               | Yes | Yes |
| T091 | Open wound of trunk, level unspecified                                       | Yes | Yes |
| T092 | Dislocation, sprain and strain of unspecified joint and ligament             | Yes | Yes |
| T093 | Injury of spinal cord, level unspecified                                     | Yes | Yes |
| T094 | Injury of unspecified nerve, spinal nerve root and plexus of trunk           | Yes | Yes |
| T095 | Injury of unspecified muscle and tendon of trunk                             | Yes | Yes |
| T096 | Traumatic amputation of trunk, level unspecified                             | Yes | Yes |
| T098 | Other specified injuries of trunk, level unspecified                         | Yes | Yes |
| T099 | Unspecified injury of trunk, level unspecified                               | Yes | Yes |
| T10X | Fracture of upper limb, level unspecified                                    | Yes | Yes |
| T100 | Fracture of upper limb, level unspecified                                    | Yes | Yes |
| T11  | Other injuries of upper limb, level unspecified                              | Yes | Yes |
| T110 | Superficial injury of upper limb, level unspecified                          | Yes | Yes |
| T111 | Open wound of upper limb, level unspecified                                  | Yes | Yes |
| T112 | Dislocation, sprain and strain of unspecified joint and ligament             | Yes | Yes |
| T113 | Injury of unspecified nerve of upper limb, level unspecified                 | Yes | Yes |
| T114 | Injury of unspecified blood vessel of upper limb, level unspecified          | Yes | Yes |
| T115 | Injury of unspecified muscle and tendon of upper limb, level unspecified     | Yes | Yes |
| T116 | Traumatic amputation of upper limb, level unspecified                        | Yes | Yes |
| T118 | Other specified injuries of upper limb, level unspecified                    | Yes | Yes |
| T119 | Unspecified injury of upper limb, level unspecified                          | Yes | Yes |
| T12X | Fracture of lower limb, level unspecified                                    | Yes | Yes |
| T120 | Fracture of lower limb, level unspecified                                    | Yes | Yes |
| T13  | Other injuries of lower limb, level unspecified                              | Yes | Yes |
| T130 | Superficial injury of lower limb, level unspecified                          | Yes | Yes |
| T131 | Open wound of lower limb, level unspecified                                  | Yes | Yes |
| T132 | Dislocation, sprain and strain of unspecified joint and ligament             | Yes | Yes |
| T133 | Injury of unspecified nerve of lower limb, level unspecified                 | Yes | Yes |
| T134 | Injury of unspecified blood vessel of lower limb, level unspecified          | Yes | Yes |
| T135 | Injury of unspecified muscle and tendon of lower limb, level unspecified     | Yes | Yes |
| T136 | Traumatic amputation of lower limb, level unspecified                        | Yes | Yes |
| T138 | Other specified injuries of lower limb, level unspecified                    | Yes | Yes |
| T139 | Unspecified injury of lower limb, level unspecified                          | Yes | Yes |



|      |                                                                 |     |     |
|------|-----------------------------------------------------------------|-----|-----|
| T14  | Injury of unspecified body region                               | Yes | Yes |
| T140 | Superficial injury of unspecified body region                   | Yes | Yes |
| T141 | Open wound of unspecified body region                           | Yes | Yes |
| T142 | Fracture of unspecified body region                             | Yes | Yes |
| T143 | Dislocation, sprain and strain of unspecified body region       | Yes | Yes |
| T144 | Injury of nerve(s) of unspecified body region                   | Yes | Yes |
| T145 | Injury of blood vessel(s) of unspecified body region            | Yes | Yes |
| T146 | Injury of muscles and tendons of unspecified body region        | Yes | Yes |
| T147 | Crushing injury and traumatic amputation of unspecified body    | Yes | Yes |
| T148 | Other injuries of unspecified body region                       | Yes | Yes |
| T149 | Injury, unspecified                                             | Yes | Yes |
| T15  | Foreign body on external eye                                    | Yes | Yes |
| T150 | Foreign body in cornea                                          | Yes | Yes |
| T151 | Foreign body in conjunctival sac                                | Yes | Yes |
| T158 | Foreign body in other and multiple parts of external eye        | Yes | Yes |
| T159 | Foreign body on external eye, part unspecified                  | Yes | Yes |
| T16X | Foreign body in ear                                             | Yes | Yes |
| T17  | Foreign body in respiratory tract                               | Yes | Yes |
| T170 | Foreign body in nasal sinus                                     | Yes | Yes |
| T171 | Foreign body in nostril                                         | Yes | Yes |
| T172 | Foreign body in pharynx                                         | Yes | Yes |
| T173 | Foreign body in larynx                                          | Yes | Yes |
| T174 | Foreign body in trachea                                         | Yes | Yes |
| T175 | Foreign body in bronchus                                        | Yes | Yes |
| T178 | Foreign body in other and multiple parts of respiratory tract   | Yes | Yes |
| T179 | Foreign body in respiratory tract, part unspecified             | Yes | Yes |
| T18  | Foreign body in alimentary tract                                | Yes | Yes |
| T180 | Foreign body in mouth                                           | Yes | Yes |
| T181 | Foreign body in oesophagus                                      | Yes | Yes |
| T182 | Foreign body in stomach                                         | Yes | Yes |
| T183 | Foreign body in small intestine                                 | Yes | Yes |
| T184 | Foreign body in colon                                           | Yes | Yes |
| T185 | Foreign body in anus and rectum                                 | Yes | Yes |
| T188 | Foreign body in other and multiple parts of alimentary tract    | Yes | Yes |
| T189 | Foreign body in alimentary tract, part unspecified              | Yes | Yes |
| T19  | Foreign body in genitourinary tract                             | Yes | Yes |
| T190 | Foreign body in urethra                                         | Yes | Yes |
| T191 | Foreign body in bladder                                         | Yes | Yes |
| T192 | Foreign body in vulva and vagina                                | Yes | Yes |
| T193 | Foreign body in uterus [any part]                               | Yes | Yes |
| T198 | Foreign body in other and multiple parts of genitourinary tract | Yes | Yes |
| T199 | Foreign body in genitourinary tract, part unspecified           | Yes | Yes |
| T20  | Burn and corrosion of head and neck                             | Yes | Yes |
| T200 | Burn of unspecified degree of head and neck                     | Yes | Yes |
| T201 | Burn of first degree of head and neck                           | Yes | Yes |
| T202 | Burn of second degree of head and neck                          | Yes | Yes |
| T203 | Burn of third degree of head and neck                           | Yes | Yes |
| T204 | Corrosion of unspecified degree of head and neck                | Yes | Yes |
| T205 | Corrosion of first degree of head and neck                      | Yes | Yes |
| T206 | Corrosion of second degree of head and neck                     | Yes | Yes |
| T207 | Corrosion of third degree of head and neck                      | Yes | Yes |
| T21  | Burn and corrosion of trunk                                     | Yes | Yes |
| T210 | Burn of unspecified degree of trunk                             | Yes | Yes |

|      |                                                                  |     |     |
|------|------------------------------------------------------------------|-----|-----|
| T211 | Burn of first degree of trunk                                    | Yes | Yes |
| T212 | Burn of second degree of trunk                                   | Yes | Yes |
| T213 | Burn of third degree of trunk                                    | Yes | Yes |
| T214 | Corrosion of unspecified degree of trunk                         | Yes | Yes |
| T215 | Corrosion of first degree of trunk                               | Yes | Yes |
| T216 | Corrosion of second degree of trunk                              | Yes | Yes |
| T217 | Corrosion of third degree of trunk                               | Yes | Yes |
| T22  | Burn and corrosion of shoulder and upper limb, except wrist an   | Yes | Yes |
| T220 | Burn of unspecified degree of shoulder and upper limb, except    | Yes | Yes |
| T221 | Burn of first degree of shoulder and upper limb, except wrist ar | Yes | Yes |
| T222 | Burn of second degree of shoulder and upper limb, except wri     | Yes | Yes |
| T223 | Burn of third degree of shoulder and upper limb, except wrist a  | Yes | Yes |
| T224 | Corrosion of unspecified degree of shoulder and upper limb, ex   | Yes | Yes |
| T225 | Corrosion of first degree of shoulder and upper limb, except wr  | Yes | Yes |
| T226 | Corrosion of second degree of shoulder and upper limb, except    | Yes | Yes |
| T227 | Corrosion of third degree of shoulder and upper limb, except w   | Yes | Yes |
| T23  | Burn and corrosion of wrist and hand                             | Yes | Yes |
| T230 | Burn of unspecified degree of wrist and hand                     | Yes | Yes |
| T231 | Burn of first degree of wrist and hand                           | Yes | Yes |
| T232 | Burn of second degree of wrist and hand                          | Yes | Yes |
| T233 | Burn of third degree of wrist and hand                           | Yes | Yes |
| T234 | Corrosion of unspecified degree of wrist and hand                | Yes | Yes |
| T235 | Corrosion of first degree of wrist and hand                      | Yes | Yes |
| T236 | Corrosion of second degree of wrist and hand                     | Yes | Yes |
| T237 | Corrosion of third degree of wrist and hand                      | Yes | Yes |
| T24  | Burn and corrosion of hip and lower limb, except ankle and foo   | Yes | Yes |
| T240 | Burn of unspecified degree of hip and lower limb, except ankle   | Yes | Yes |
| T241 | Burn of first degree of hip and lower limb, except ankle and foc | Yes | Yes |
| T242 | Burn of second degree of hip and lower limb, except ankle and    | Yes | Yes |
| T243 | Burn of third degree of hip and lower limb, except ankle and fo  | Yes | Yes |
| T244 | Corrosion of unspecified degree of hip and lower limb, except ε  | Yes | Yes |
| T245 | Corrosion of first degree of hip and lower limb, except ankle an | Yes | Yes |
| T246 | Corrosion of second degree of hip and lower limb, except ankle   | Yes | Yes |
| T247 | Corrosion of third degree of hip and lower limb, except ankle a  | Yes | Yes |
| T25  | Burn and corrosion of ankle and foot                             | Yes | Yes |
| T250 | Burn of unspecified degree of ankle and foot                     | Yes | Yes |
| T251 | Burn of first degree of ankle and foot                           | Yes | Yes |
| T252 | Burn of second degree of ankle and foot                          | Yes | Yes |
| T253 | Burn of third degree of ankle and foot                           | Yes | Yes |
| T254 | Corrosion of unspecified degree of ankle and foot                | Yes | Yes |
| T255 | Corrosion of first degree of ankle and foot                      | Yes | Yes |
| T256 | Corrosion of second degree of ankle and foot                     | Yes | Yes |
| T257 | Corrosion of third degree of ankle and foot                      | Yes | Yes |
| T26  | Burn and corrosion confined to eye and adnexa                    | Yes | Yes |
| T260 | Burn of eyelid and periocular area                               | Yes | Yes |
| T261 | Burn of cornea and conjunctival sac                              | Yes | Yes |
| T262 | Burn with resulting rupture and destruction of eyeball           | Yes | Yes |
| T263 | Burn of other parts of eye and adnexa                            | Yes | Yes |
| T264 | Burn of eye and adnexa, part unspecified                         | Yes | Yes |
| T265 | Corrosion of eyelid and periocular area                          | Yes | Yes |
| T266 | Corrosion of cornea and conjunctival sac                         | Yes | Yes |
| T267 | Corrosion with resulting rupture and destruction of eyeball      | Yes | Yes |
| T268 | Corrosion of other parts of eye and adnexa                       | Yes | Yes |

|      |                                                                  |     |     |
|------|------------------------------------------------------------------|-----|-----|
| T269 | Corrosion of eye and adnexa, part unspecified                    | Yes | Yes |
| T27  | Burn and corrosion of respiratory tract                          | Yes | Yes |
| T274 | Corrosion of larynx and trachea                                  | Yes | Yes |
| T275 | Corrosion involving larynx and trachea with lung                 | Yes | Yes |
| T276 | Corrosion of other parts of respiratory tract                    | Yes | Yes |
| T277 | Corrosion of respiratory tract, part unspecified                 | Yes | Yes |
| T28  | Burn and corrosion of other internal organs                      | Yes | Yes |
| T280 | Burn of mouth and pharynx                                        | Yes | Yes |
| T281 | Burn of oesophagus                                               | Yes | Yes |
| T282 | Burn of other parts of alimentary tract                          | Yes | Yes |
| T283 | Burn of internal genitourinary organs                            | Yes | Yes |
| T284 | Burn of other and unspecified internal organs                    | Yes | Yes |
| T285 | Corrosion of mouth and pharynx                                   | Yes | Yes |
| T286 | Corrosion of oesophagus                                          | Yes | Yes |
| T287 | Corrosion of other parts of alimentary tract                     | Yes | Yes |
| T288 | Corrosion of internal genitourinary organs                       | Yes | Yes |
| T289 | Corrosion of other and unspecified internal organs               | Yes | Yes |
| T29  | Burns and corrosions of multiple body regions                    | Yes | Yes |
| T290 | Burns of multiple regions, unspecified degree                    | Yes | Yes |
| T291 | Burns of multiple regions, no more than first-degree burns       | Yes | Yes |
| T292 | Burns of multiple regions, no more than second-degree burns      | Yes | Yes |
| T293 | Burns of multiple regions, at least one burn of third degree     | Yes | Yes |
| T294 | Corrosions of multiple regions, unspecified degree               | Yes | Yes |
| T295 | Corrosions of multiple regions, no more than first-degree        | Yes | Yes |
| T296 | Corrosions of multiple regions, no more than second-degree       | Yes | Yes |
| T297 | Corrosions of multiple regions, at least one corrosion of third  | Yes | Yes |
| T30  | Burn and corrosion, body region unspecified                      | Yes | Yes |
| T300 | Burn of unspecified body region, unspecified degree              | Yes | Yes |
| T301 | Burn of first degree, body region unspecified                    | Yes | Yes |
| T302 | Burn of second degree, body region unspecified                   | Yes | Yes |
| T303 | Burn of third degree, body region unspecified                    | Yes | Yes |
| T304 | Corrosion of unspecified body region, unspecified degree         | Yes | Yes |
| T305 | Corrosion of first degree, body region unspecified               | Yes | Yes |
| T306 | Corrosion of second degree, body region unspecified              | Yes | Yes |
| T307 | Corrosion of third degree, body region unspecified               | Yes | Yes |
| T31  | Burns classified according to extent of body surface involved    | Yes | Yes |
| T310 | Burns involving less than 10% of body surface                    | Yes | Yes |
| T311 | Burns involving 10-19% of body surface                           | Yes | Yes |
| T312 | Burns involving 20-29% of body surface                           | Yes | Yes |
| T313 | Burns involving 30-39% of body surface                           | Yes | Yes |
| T314 | Burns involving 40-49% of body surface                           | Yes | Yes |
| T315 | Burns involving 50-59% of body surface                           | Yes | Yes |
| T316 | Burns involving 60-69% of body surface                           | Yes | Yes |
| T317 | Burns involving 70-79% of body surface                           | Yes | Yes |
| T318 | Burns involving 80-89% of body surface                           | Yes | Yes |
| T319 | Burns involving 90% or more of body surface                      | Yes | Yes |
| T32  | Corrosions classified according to extent of body surface involv | Yes | Yes |
| T320 | Corrosions involving less than 10% of body surface               | Yes | Yes |
| T321 | Corrosions involving 10-19% of body surface                      | Yes | Yes |
| T322 | Corrosions involving 20-29% of body surface                      | Yes | Yes |
| T323 | Corrosions involving 30-39% of body surface                      | Yes | Yes |
| T324 | Corrosions involving 40-49% of body surface                      | Yes | Yes |
| T325 | Corrosions involving 50-59% of body surface                      | Yes | Yes |

|      |                                                                                         |     |     |
|------|-----------------------------------------------------------------------------------------|-----|-----|
| T326 | Corrosions involving 60-69% of body surface                                             | Yes | Yes |
| T327 | Corrosions involving 70-79% of body surface                                             | Yes | Yes |
| T328 | Corrosions involving 80-89% of body surface                                             | Yes | Yes |
| T329 | Corrosions involving 90% or more of body surface                                        | Yes | Yes |
| T36  | Poisoning by systemic antibiotics                                                       | Yes | Yes |
| T360 | Poisoning: Penicillins                                                                  | Yes | Yes |
| T361 | Poisoning: Cephalosporins and other beta-lactam antibiotics                             | Yes | Yes |
| T362 | Poisoning: Chloramphenicol group                                                        | Yes | Yes |
| T363 | Poisoning: Macrolides                                                                   | Yes | Yes |
| T364 | Poisoning: Tetracyclines                                                                | Yes | Yes |
| T365 | Poisoning: Aminoglycosides                                                              | Yes | Yes |
| T366 | Poisoning: Rifamycins                                                                   | Yes | Yes |
| T367 | Poisoning: Antifungal antibiotics, systemically used                                    | Yes | Yes |
| T368 | Poisoning: Other systemic antibiotics                                                   | Yes | Yes |
| T369 | Poisoning: Systemic antibiotic, unspecified                                             | Yes | Yes |
| T37  | Poisoning by other systemic anti-infectives and antiparasitics                          | Yes | Yes |
| T370 | Poisoning: Sulfonamides                                                                 | Yes | Yes |
| T371 | Poisoning: Antimycobacterial drugs                                                      | Yes | Yes |
| T372 | Poisoning: Antimalarials and drugs acting on other blood protozoa                       | Yes | Yes |
| T373 | Poisoning: Other antiprotozoal drugs                                                    | Yes | Yes |
| T374 | Poisoning: Anthelmintics                                                                | Yes | Yes |
| T375 | Poisoning: Antiviral drugs                                                              | Yes | Yes |
| T378 | Poisoning: Other specified systemic anti-infectives and antiparasitics                  | Yes | Yes |
| T379 | Poisoning: Systemic anti-infective and antiparasitic, unspecified                       | Yes | Yes |
| T38  | Poisoning by hormones and their synthetic substitutes and antagonists                   | Yes | Yes |
| T380 | Poisoning: Glucocorticoids and synthetic analogues                                      | Yes | Yes |
| T381 | Poisoning: Thyroid hormones and substitutes                                             | Yes | Yes |
| T382 | Poisoning: Antithyroid drugs                                                            | Yes | Yes |
| T383 | Poisoning: Insulin and oral hypoglycaemic [antidiabetic] drugs                          | Yes | Yes |
| T384 | Poisoning: Oral contraceptives                                                          | Yes | Yes |
| T385 | Poisoning: Other estrogens and progestogens                                             | Yes | Yes |
| T386 | Poisoning: Antigonadotrophins, antiestrogens, antiandrogens, and androgens              | Yes | Yes |
| T387 | Poisoning: Androgens and anabolic congeners                                             | Yes | Yes |
| T388 | Poisoning: Other and unspecified hormones and their synthetic antagonists               | Yes | Yes |
| T389 | Poisoning: Other and unspecified hormone antagonists                                    | Yes | Yes |
| T39  | Poisoning by nonopioid analgesics, antipyretics and antirheumatics                      | Yes | Yes |
| T390 | Poisoning: Salicylates                                                                  | Yes | Yes |
| T391 | Poisoning: 4-Aminophenol derivatives                                                    | Yes | Yes |
| T392 | Poisoning: Pyrazolone derivatives                                                       | Yes | Yes |
| T393 | Poisoning: Other nonsteroidal anti-inflammatory drugs [NSAID]                           | Yes | Yes |
| T394 | Poisoning: Antirheumatics, not elsewhere classified                                     | Yes | Yes |
| T398 | Poisoning: Other nonopioid analgesics and antipyretics, not elsewhere classified        | Yes | Yes |
| T399 | Poisoning: Nonopioid analgesic, antipyretic and antirheumatic, not elsewhere classified | Yes | Yes |
| T40  | Poisoning by narcotics and psychodysleptics [hallucinogens]                             | Yes | Yes |
| T400 | Poisoning: Opium                                                                        | Yes | Yes |
| T401 | Poisoning: Heroin                                                                       | Yes | Yes |
| T402 | Poisoning: Other opioids                                                                | Yes | Yes |
| T403 | Poisoning: Methadone                                                                    | Yes | Yes |
| T404 | Poisoning: Other synthetic narcotics                                                    | Yes | Yes |
| T405 | Poisoning: Cocaine                                                                      | Yes | Yes |
| T406 | Poisoning: Other and unspecified narcotics                                              | Yes | Yes |
| T407 | Poisoning: Cannabis (derivatives)                                                       | Yes | Yes |
| T408 | Poisoning: Lysergide [LSD]                                                              | Yes | Yes |

|      |                                                                  |     |     |
|------|------------------------------------------------------------------|-----|-----|
| T409 | Poisoning: Other and unspecified psychodysleptics [hallucinoge   | Yes | Yes |
| T41  | Poisoning by anaesthetics and therapeutic gases                  | Yes | Yes |
| T410 | Poisoning: Inhaled anaesthetics                                  | Yes | Yes |
| T411 | Poisoning: Intravenous anaesthetics                              | Yes | Yes |
| T412 | Poisoning: Other and unspecified general anaesthetics            | Yes | Yes |
| T413 | Poisoning: Local anaesthetics                                    | Yes | Yes |
| T414 | Poisoning: Anaesthetic, unspecified                              | Yes | Yes |
| T415 | Poisoning: Therapeutic gases                                     | Yes | Yes |
| T42  | Poisoning by antiepileptic, sedative-hypnotic and antiparkinson  | Yes | Yes |
| T420 | Poisoning: Hydantoin derivatives                                 | Yes | Yes |
| T421 | Poisoning: Iminostilbenes                                        | Yes | Yes |
| T422 | Poisoning: Succinimides and oxazolidinediones                    | Yes | Yes |
| T423 | Poisoning: Barbiturates                                          | Yes | Yes |
| T424 | Poisoning: Benzodiazepines                                       | Yes | Yes |
| T425 | Poisoning: Mixed antiepileptics, not elsewhere classified        | Yes | Yes |
| T426 | Poisoning: Other antiepileptic and sedative-hypnotic drugs       | Yes | Yes |
| T427 | Poisoning: Antiepileptic and sedative-hypnotic drugs, unspecifi  | Yes | Yes |
| T428 | Poisoning: Antiparkinsonism drugs and other central muscle-to    | Yes | Yes |
| T43  | Poisoning by psychotropic drugs, not elsewhere classified        | Yes | Yes |
| T430 | Poisoning: Tricyclic and tetracyclic antidepressants             | Yes | Yes |
| T431 | Poisoning: Monoamine-oxidase-inhibitor antidepressants           | Yes | Yes |
| T432 | Poisoning: Other and unspecified antidepressants                 | Yes | Yes |
| T433 | Poisoning: Phenothiazine antipsychotics and neuroleptics         | Yes | Yes |
| T434 | Poisoning: Butyrophenone and thioxanthene neuroleptics           | Yes | Yes |
| T435 | Poisoning: Other and unspecified antipsychotics and neurolept    | Yes | Yes |
| T436 | Poisoning: Psychostimulants with abuse potential                 | Yes | Yes |
| T438 | Poisoning: Other psychotropic drugs, not elsewhere classified    | Yes | Yes |
| T439 | Poisoning: Psychotropic drug, unspecified                        | Yes | Yes |
| T44  | Poisoning by drugs primarily affecting the autonomic nervous s   | Yes | Yes |
| T440 | Poisoning: Anticholinesterase agents                             | Yes | Yes |
| T441 | Poisoning: Other parasympathomimetics [cholinergics]             | Yes | Yes |
| T442 | Poisoning: Ganglionic blocking drugs, not elsewhere classified   | Yes | Yes |
| T443 | Poisoning: Other parasympatholytics [anticholinergics and anti   | Yes | Yes |
| T444 | Poisoning: Predominantly alpha-adrenoreceptor agonists, not €    | Yes | Yes |
| T445 | Poisoning: Predominantly beta-adrenoreceptor agonists, not el    | Yes | Yes |
| T446 | Poisoning: Alpha-adrenoreceptor antagonists, not elsewhere cl    | Yes | Yes |
| T447 | Poisoning: Beta-adrenoreceptor antagonists, not elsewhere cla    | Yes | Yes |
| T448 | Poisoning: Centrally acting and adrenergic-neuron-blocking age   | Yes | Yes |
| T449 | Poisoning: Other and unspecified drugs primarily affecting the i | Yes | Yes |
| T45  | Poisoning by primarily systemic and haematological agents, noi   | Yes | Yes |
| T450 | Poisoning: Antiallergic and antiemetic drugs                     | Yes | Yes |
| T451 | Poisoning: Antineoplastic and immunosuppressive drugs            | Yes | Yes |
| T452 | Poisoning: Vitamins, not elsewhere classified                    | Yes | Yes |
| T453 | Poisoning: Enzymes, not elsewhere classified                     | Yes | Yes |
| T454 | Poisoning: Iron and its compounds                                | Yes | Yes |
| T455 | Poisoning: Anticoagulants                                        | Yes | Yes |
| T456 | Poisoning: Fibrinolysis-affecting drugs                          | Yes | Yes |
| T457 | Poisoning: Anticoagulant antagonists, vitamin K and other coag   | Yes | Yes |
| T458 | Poisoning: Other primarily systemic and haematological agents    | Yes | Yes |
| T459 | Poisoning: Primarily systemic and haematological agent, unspe    | Yes | Yes |
| T46  | Poisoning by agents primarily affecting the cardiovascular syste | Yes | Yes |
| T460 | Poisoning: Cardiac-stimulant glycosides and drugs of similar act | Yes | Yes |
| T461 | Poisoning: Calcium-channel blockers                              | Yes | Yes |

|      |                                                                           |     |     |
|------|---------------------------------------------------------------------------|-----|-----|
| T462 | Poisoning: Other antidysrhythmic drugs, not elsewhere classified          | Yes | Yes |
| T463 | Poisoning: Coronary vasodilators, not elsewhere classified                | Yes | Yes |
| T464 | Poisoning: Angiotensin-converting-enzyme inhibitors                       | Yes | Yes |
| T465 | Poisoning: Other antihypertensive drugs, not elsewhere classified         | Yes | Yes |
| T466 | Poisoning: Antihyperlipidaemic and antiarteriosclerotic drugs             | Yes | Yes |
| T467 | Poisoning: Peripheral vasodilators                                        | Yes | Yes |
| T468 | Poisoning: Antivaricose drugs, including sclerosing agents                | Yes | Yes |
| T469 | Poisoning: Other and unspecified agents primarily affecting the           | Yes | Yes |
| T47  | Poisoning by agents primarily affecting the gastrointestinal system       | Yes | Yes |
| T470 | Poisoning: Histamine H <sub>2</sub> -receptor antagonists                 | Yes | Yes |
| T471 | Poisoning: Other antacids and anti-gastric-secretion drugs                | Yes | Yes |
| T472 | Poisoning: Stimulant laxatives                                            | Yes | Yes |
| T473 | Poisoning: Saline and osmotic laxatives                                   | Yes | Yes |
| T474 | Poisoning: Other laxatives                                                | Yes | Yes |
| T475 | Poisoning: Digestants                                                     | Yes | Yes |
| T476 | Poisoning: Antidiarrhoeal drugs                                           | Yes | Yes |
| T477 | Poisoning: Emetics                                                        | Yes | Yes |
| T478 | Poisoning: Other agents primarily affecting the gastrointestinal system   | Yes | Yes |
| T479 | Poisoning: Agent primarily affecting the gastrointestinal system          | Yes | Yes |
| T48  | Poisoning by agents primarily acting on smooth and skeletal muscles       | Yes | Yes |
| T480 | Poisoning: Oxytocic drugs                                                 | Yes | Yes |
| T481 | Poisoning: Skeletal muscle relaxants [neuromuscular blocking agents]      | Yes | Yes |
| T482 | Poisoning: Other and unspecified agents primarily acting on muscles       | Yes | Yes |
| T483 | Poisoning: Antitussives                                                   | Yes | Yes |
| T484 | Poisoning: Expectorants                                                   | Yes | Yes |
| T485 | Poisoning: Anti-common-cold drugs                                         | Yes | Yes |
| T486 | Poisoning: Antiasthmatics, not elsewhere classified                       | Yes | Yes |
| T487 | Poisoning: Other and unspecified agents primarily acting on the           | Yes | Yes |
| T49  | Poisoning by topical agents primarily affecting skin and mucous membranes | Yes | Yes |
| T490 | Poisoning: Local antifungal, anti-infective and anti-inflammatory         | Yes | Yes |
| T491 | Poisoning: Antipruritics                                                  | Yes | Yes |
| T492 | Poisoning: Local astringents and local detergents                         | Yes | Yes |
| T493 | Poisoning: Emollients, demulcents and protectants                         | Yes | Yes |
| T494 | Poisoning: Keratolytics, keratoplastics and other hair treatments         | Yes | Yes |
| T495 | Poisoning: Ophthalmological drugs and preparations                        | Yes | Yes |
| T496 | Poisoning: Otorhinolaryngological drugs and preparations                  | Yes | Yes |
| T497 | Poisoning: Dental drugs, topically applied                                | Yes | Yes |
| T498 | Poisoning: Other topical agents                                           | Yes | Yes |
| T499 | Poisoning: Topical agent, unspecified                                     | Yes | Yes |
| T50  | Poisoning by diuretics and other and unspecified drugs, medicinal         | Yes | Yes |
| T500 | Poisoning: Mineralocorticoids and their antagonists                       | Yes | Yes |
| T501 | Poisoning: Loop [high-ceiling] diuretics                                  | Yes | Yes |
| T502 | Poisoning: Carbonic-anhydrase inhibitors, benzothiadiazides and           | Yes | Yes |
| T503 | Poisoning: Electrolytic, caloric and water-balance agents                 | Yes | Yes |
| T504 | Poisoning: Drugs affecting uric acid metabolism                           | Yes | Yes |
| T505 | Poisoning: Appetite depressants                                           | Yes | Yes |
| T506 | Poisoning: Antidotes and chelating agents, not elsewhere classified       | Yes | Yes |
| T507 | Poisoning: Analeptics and opioid receptor antagonists                     | Yes | Yes |
| T508 | Poisoning: Diagnostic agents                                              | Yes | Yes |
| T509 | Poisoning: Other and unspecified drugs, medicaments and biologicals       | Yes | Yes |
| T51  | Toxic effect of alcohol                                                   | Yes | Yes |
| T510 | Toxic effect: Ethanol                                                     | Yes | Yes |
| T511 | Toxic effect: Methanol                                                    | Yes | Yes |

|      |                                                                            |     |     |
|------|----------------------------------------------------------------------------|-----|-----|
| T512 | Toxic effect: 2-Propanol                                                   | Yes | Yes |
| T513 | Toxic effect: Fusel oil                                                    | Yes | Yes |
| T518 | Toxic effect: Other alcohols                                               | Yes | Yes |
| T519 | Toxic effect: Alcohol, unspecified                                         | Yes | Yes |
| T52  | Toxic effect of organic solvents                                           | Yes | Yes |
| T520 | Toxic effect: Petroleum products                                           | Yes | Yes |
| T521 | Toxic effect: Benzene                                                      | Yes | Yes |
| T522 | Toxic effect: Homologues of benzene                                        | Yes | Yes |
| T523 | Toxic effect: Glycols                                                      | Yes | Yes |
| T524 | Toxic effect: Ketones                                                      | Yes | Yes |
| T528 | Toxic effect: Other organic solvents                                       | Yes | Yes |
| T529 | Toxic effect: Organic solvent, unspecified                                 | Yes | Yes |
| T53  | Toxic effect of halogen derivatives of aliphatic and aromatic hydrocarbons | Yes | Yes |
| T530 | Toxic effect: Carbon tetrachloride                                         | Yes | Yes |
| T531 | Toxic effect: Chloroform                                                   | Yes | Yes |
| T532 | Toxic effect: Trichloroethylene                                            | Yes | Yes |
| T533 | Toxic effect: Tetrachloroethylene                                          | Yes | Yes |
| T534 | Toxic effect: Dichloromethane                                              | Yes | Yes |
| T535 | Toxic effect: Chlorofluorocarbons                                          | Yes | Yes |
| T536 | Toxic effect: Other halogen derivatives of aliphatic hydrocarbons          | Yes | Yes |
| T537 | Toxic effect: Other halogen derivatives of aromatic hydrocarbons           | Yes | Yes |
| T539 | Toxic effect: Halogen derivative of aliphatic and aromatic hydrocarbons    | Yes | Yes |
| T54  | Toxic effect of corrosive substances                                       | Yes | Yes |
| T540 | Toxic effect: Phenol and phenol homologues                                 | Yes | Yes |
| T541 | Toxic effect: Other corrosive organic compounds                            | Yes | Yes |
| T542 | Toxic effect: Corrosive acids and acid-like substances                     | Yes | Yes |
| T543 | Toxic effect: Corrosive alkalis and alkali-like substances                 | Yes | Yes |
| T549 | Toxic effect: Corrosive substance, unspecified                             | Yes | Yes |
| T55X | Toxic effect of soaps and detergents                                       | Yes | Yes |
| T56  | Toxic effect of metals                                                     | Yes | Yes |
| T560 | Toxic effect: Lead and its compounds                                       | Yes | Yes |
| T561 | Toxic effect: Mercury and its compounds                                    | Yes | Yes |
| T562 | Toxic effect: Chromium and its compounds                                   | Yes | Yes |
| T563 | Toxic effect: Cadmium and its compounds                                    | Yes | Yes |
| T564 | Toxic effect: Copper and its compounds                                     | Yes | Yes |
| T565 | Toxic effect: Zinc and its compounds                                       | Yes | Yes |
| T566 | Toxic effect: Tin and its compounds                                        | Yes | Yes |
| T567 | Toxic effect: Beryllium and its compounds                                  | Yes | Yes |
| T568 | Toxic effect: Other metals                                                 | Yes | Yes |
| T569 | Toxic effect: Metal, unspecified                                           | Yes | Yes |
| T57  | Toxic effect of other inorganic substances                                 | Yes | Yes |
| T570 | Toxic effect: Arsenic and its compounds                                    | Yes | Yes |
| T571 | Toxic effect: Phosphorus and its compounds                                 | Yes | Yes |
| T572 | Toxic effect: Manganese and its compounds                                  | Yes | Yes |
| T573 | Toxic effect: Hydrogen cyanide                                             | Yes | Yes |
| T578 | Toxic effect: Other specified inorganic substances                         | Yes | Yes |
| T579 | Toxic effect: Inorganic substance, unspecified                             | Yes | Yes |
| T58X | Toxic effect of carbon monoxide                                            | Yes | Yes |
| T59  | Toxic effect of other gases, fumes and vapours                             | Yes | Yes |
| T590 | Toxic effect: Nitrogen oxides                                              | Yes | Yes |
| T591 | Toxic effect: Sulfur dioxide                                               | Yes | Yes |
| T592 | Toxic effect: Formaldehyde                                                 | Yes | Yes |
| T593 | Toxic effect: Lacrimogenic gas                                             | Yes | Yes |



|      |                                                                |     |     |
|------|----------------------------------------------------------------|-----|-----|
| T594 | Toxic effect: Chlorine gas                                     | Yes | Yes |
| T595 | Toxic effect: Fluorine gas and hydrogen fluoride               | Yes | Yes |
| T596 | Toxic effect: Hydrogen sulfide                                 | Yes | Yes |
| T597 | Toxic effect: Carbon dioxide                                   | Yes | Yes |
| T598 | Toxic effect: Other specified gases, fumes and vapours         | Yes | Yes |
| T599 | Toxic effect: Gases, fumes and vapours, unspecified            | Yes | Yes |
| T60  | Toxic effect of pesticides                                     | Yes | Yes |
| T600 | Toxic effect: Organophosphate and carbamate insecticides       | Yes | Yes |
| T601 | Toxic effect: Halogenated insecticides                         | Yes | Yes |
| T602 | Toxic effect: Other insecticides                               | Yes | Yes |
| T603 | Toxic effect: Herbicides and fungicides                        | Yes | Yes |
| T604 | Toxic effect: Rodenticides                                     | Yes | Yes |
| T608 | Toxic effect: Other pesticides                                 | Yes | Yes |
| T609 | Toxic effect: Pesticide, unspecified                           | Yes | Yes |
| T65  | Toxic effect of other and unspecified substances               | Yes | Yes |
| T650 | Toxic effect: Cyanides                                         | Yes | Yes |
| T651 | Toxic effect: Strychnine and its salts                         | Yes | Yes |
| T652 | Toxic effect: Tobacco and nicotine                             | Yes | Yes |
| T653 | Toxic effect: Nitroderivatives and aminoderivatives of benzene | Yes | Yes |
| T654 | Toxic effect: Carbon disulfide                                 | Yes | Yes |
| T655 | Toxic effect: Nitroglycerin and other nitric acids and esters  | Yes | Yes |
| T656 | Toxic effect: Paints and dyes, not elsewhere classified        | Yes | Yes |
| T658 | Toxic effect: Toxic effect of other specified substances       | Yes | Yes |
| T659 | Toxic effect: Toxic effect of unspecified substance            | Yes | Yes |
| T751 | Drowning and nonfatal submersion                               | Yes | Yes |
| W10  | Fall on and from stairs and steps                              | Yes | Yes |
| W100 | Fall on and from stairs and steps                              | Yes | Yes |
| W101 | Fall on and from stairs and steps                              | Yes | Yes |
| W102 | Fall on and from stairs and steps                              | Yes | Yes |
| W103 | Fall on and from stairs and steps                              | Yes | Yes |
| W104 | Fall on and from stairs and steps                              | Yes | Yes |
| W105 | Fall on and from stairs and steps                              | Yes | Yes |
| W106 | Fall on and from stairs and steps                              | Yes | Yes |
| W107 | Fall on and from stairs and steps                              | Yes | Yes |
| W108 | Fall on and from stairs and steps                              | Yes | Yes |
| W109 | Fall on and from stairs and steps                              | Yes | Yes |
| W13  | Fall from, out of or through building or structure             | Yes | Yes |
| W130 | Fall from, out of or through building or structure             | Yes | Yes |
| W131 | Fall from, out of or through building or structure             | Yes | Yes |
| W132 | Fall from, out of or through building or structure             | Yes | Yes |
| W133 | Fall from, out of or through building or structure             | Yes | Yes |
| W134 | Fall from, out of or through building or structure             | Yes | Yes |
| W135 | Fall from, out of or through building or structure             | Yes | Yes |
| W136 | Fall from, out of or through building or structure             | Yes | Yes |
| W137 | Fall from, out of or through building or structure             | Yes | Yes |
| W138 | Fall from, out of or through building or structure             | Yes | Yes |
| W139 | Fall from, out of or through building or structure             | Yes | Yes |
| W65  | Drowning and submersion while in bath-tub                      | Yes | Yes |
| W650 | Drowning and submersion while in bath-tub                      | Yes | Yes |
| W651 | Drowning and submersion while in bath-tub                      | Yes | Yes |
| W652 | Drowning and submersion while in bath-tub                      | Yes | Yes |
| W653 | Drowning and submersion while in bath-tub                      | Yes | Yes |
| W654 | Drowning and submersion while in bath-tub                      | Yes | Yes |

|      |                                                                     |     |     |
|------|---------------------------------------------------------------------|-----|-----|
| W655 | Drowning and submersion while in bath-tub                           | Yes | Yes |
| W656 | Drowning and submersion while in bath-tub                           | Yes | Yes |
| W657 | Drowning and submersion while in bath-tub                           | Yes | Yes |
| W658 | Drowning and submersion while in bath-tub                           | Yes | Yes |
| W659 | Drowning and submersion while in bath-tub                           | Yes | Yes |
| X02  | Exposure to controlled fire in building or structure                | Yes | Yes |
| X020 | Exposure to controlled fire in building or structure                | Yes | Yes |
| X021 | Exposure to controlled fire in building or structure                | Yes | Yes |
| X022 | Exposure to controlled fire in building or structure                | Yes | Yes |
| X023 | Exposure to controlled fire in building or structure                | Yes | Yes |
| X024 | Exposure to controlled fire in building or structure                | Yes | Yes |
| X025 | Exposure to controlled fire in building or structure                | Yes | Yes |
| X026 | Exposure to controlled fire in building or structure                | Yes | Yes |
| X027 | Exposure to controlled fire in building or structure                | Yes | Yes |
| X028 | Exposure to controlled fire in building or structure                | Yes | Yes |
| X029 | Exposure to controlled fire in building or structure                | Yes | Yes |
| X40  | Accidental poisoning by and exposure to nonopioid analgesics, Yes   | Yes | Yes |
| X400 | Accidental poisoning by and exposure to nonopioid analgesics, Yes   | Yes | Yes |
| X401 | Accidental poisoning by and exposure to nonopioid analgesics, Yes   | Yes | Yes |
| X402 | Accidental poisoning by and exposure to nonopioid analgesics, Yes   | Yes | Yes |
| X403 | Accidental poisoning by and exposure to nonopioid analgesics, Yes   | Yes | Yes |
| X404 | Accidental poisoning by and exposure to nonopioid analgesics, Yes   | Yes | Yes |
| X405 | Accidental poisoning by and exposure to nonopioid analgesics, Yes   | Yes | Yes |
| X406 | Accidental poisoning by and exposure to nonopioid analgesics, Yes   | Yes | Yes |
| X407 | Accidental poisoning by and exposure to nonopioid analgesics, Yes   | Yes | Yes |
| X408 | Accidental poisoning by and exposure to nonopioid analgesics, Yes   | Yes | Yes |
| X409 | Accidental poisoning by and exposure to nonopioid analgesics, Yes   | Yes | Yes |
| X41  | Accidental poisoning by and exposure to antiepileptic, sedative Yes | Yes | Yes |
| X410 | Accidental poisoning by and exposure to antiepileptic, sedative Yes | Yes | Yes |
| X411 | Accidental poisoning by and exposure to antiepileptic, sedative Yes | Yes | Yes |
| X412 | Accidental poisoning by and exposure to antiepileptic, sedative Yes | Yes | Yes |
| X413 | Accidental poisoning by and exposure to antiepileptic, sedative Yes | Yes | Yes |
| X414 | Accidental poisoning by and exposure to antiepileptic, sedative Yes | Yes | Yes |
| X415 | Accidental poisoning by and exposure to antiepileptic, sedative Yes | Yes | Yes |
| X416 | Accidental poisoning by and exposure to antiepileptic, sedative Yes | Yes | Yes |
| X417 | Accidental poisoning by and exposure to antiepileptic, sedative Yes | Yes | Yes |
| X418 | Accidental poisoning by and exposure to antiepileptic, sedative Yes | Yes | Yes |
| X419 | Accidental poisoning by and exposure to antiepileptic, sedative Yes | Yes | Yes |
| X42  | Accidental poisoning by and exposure to narcotics and psychod Yes   | Yes | Yes |
| X420 | Accidental poisoning by and exposure to narcotics and psychod Yes   | Yes | Yes |
| X421 | Accidental poisoning by and exposure to narcotics and psychod Yes   | Yes | Yes |
| X422 | Accidental poisoning by and exposure to narcotics and psychod Yes   | Yes | Yes |
| X423 | Accidental poisoning by and exposure to narcotics and psychod Yes   | Yes | Yes |
| X424 | Accidental poisoning by and exposure to narcotics and psychod Yes   | Yes | Yes |
| X425 | Accidental poisoning by and exposure to narcotics and psychod Yes   | Yes | Yes |
| X426 | Accidental poisoning by and exposure to narcotics and psychod Yes   | Yes | Yes |
| X427 | Accidental poisoning by and exposure to narcotics and psychod Yes   | Yes | Yes |
| X428 | Accidental poisoning by and exposure to narcotics and psychod Yes   | Yes | Yes |
| X429 | Accidental poisoning by and exposure to narcotics and psychod Yes   | Yes | Yes |
| X43  | Accidental poisoning by and exposure to other drugs acting on Yes   | Yes | Yes |
| X430 | Accidental poisoning by and exposure to other drugs acting on Yes   | Yes | Yes |
| X431 | Accidental poisoning by and exposure to other drugs acting on Yes   | Yes | Yes |
| X432 | Accidental poisoning by and exposure to other drugs acting on Yes   | Yes | Yes |

|      |                                                                |     |     |
|------|----------------------------------------------------------------|-----|-----|
| X433 | Accidental poisoning by and exposure to other drugs acting on  | Yes | Yes |
| X434 | Accidental poisoning by and exposure to other drugs acting on  | Yes | Yes |
| X435 | Accidental poisoning by and exposure to other drugs acting on  | Yes | Yes |
| X436 | Accidental poisoning by and exposure to other drugs acting on  | Yes | Yes |
| X437 | Accidental poisoning by and exposure to other drugs acting on  | Yes | Yes |
| X438 | Accidental poisoning by and exposure to other drugs acting on  | Yes | Yes |
| X439 | Accidental poisoning by and exposure to other drugs acting on  | Yes | Yes |
| X44  | Accidental poisoning by and exposure to other and unspecified  | Yes | Yes |
| X440 | Accidental poisoning by and exposure to other and unspecified  | Yes | Yes |
| X441 | Accidental poisoning by and exposure to other and unspecified  | Yes | Yes |
| X442 | Accidental poisoning by and exposure to other and unspecified  | Yes | Yes |
| X443 | Accidental poisoning by and exposure to other and unspecified  | Yes | Yes |
| X444 | Accidental poisoning by and exposure to other and unspecified  | Yes | Yes |
| X445 | Accidental poisoning by and exposure to other and unspecified  | Yes | Yes |
| X446 | Accidental poisoning by and exposure to other and unspecified  | Yes | Yes |
| X447 | Accidental poisoning by and exposure to other and unspecified  | Yes | Yes |
| X448 | Accidental poisoning by and exposure to other and unspecified  | Yes | Yes |
| X449 | Accidental poisoning by and exposure to other and unspecified  | Yes | Yes |
| X45  | Accidental poisoning by and exposure to alcohol                | Yes | Yes |
| X450 | Accidental poisoning by and exposure to alcohol                | Yes | Yes |
| X451 | Accidental poisoning by and exposure to alcohol                | Yes | Yes |
| X452 | Accidental poisoning by and exposure to alcohol                | Yes | Yes |
| X453 | Accidental poisoning by and exposure to alcohol                | Yes | Yes |
| X454 | Accidental poisoning by and exposure to alcohol                | Yes | Yes |
| X455 | Accidental poisoning by and exposure to alcohol                | Yes | Yes |
| X456 | Accidental poisoning by and exposure to alcohol                | Yes | Yes |
| X457 | Accidental poisoning by and exposure to alcohol                | Yes | Yes |
| X458 | Accidental poisoning by and exposure to alcohol                | Yes | Yes |
| X459 | Accidental poisoning by and exposure to alcohol                | Yes | Yes |
| X46  | Accidental poisoning by and exposure to organic solvents and f | Yes | Yes |
| X460 | Accidental poisoning by and exposure to organic solvents and f | Yes | Yes |
| X461 | Accidental poisoning by and exposure to organic solvents and f | Yes | Yes |
| X462 | Accidental poisoning by and exposure to organic solvents and f | Yes | Yes |
| X463 | Accidental poisoning by and exposure to organic solvents and f | Yes | Yes |
| X464 | Accidental poisoning by and exposure to organic solvents and f | Yes | Yes |
| X465 | Accidental poisoning by and exposure to organic solvents and f | Yes | Yes |
| X466 | Accidental poisoning by and exposure to organic solvents and f | Yes | Yes |
| X467 | Accidental poisoning by and exposure to organic solvents and f | Yes | Yes |
| X468 | Accidental poisoning by and exposure to organic solvents and f | Yes | Yes |
| X469 | Accidental poisoning by and exposure to organic solvents and f | Yes | Yes |
| X47  | Accidental poisoning by and exposure to other gases and vapour | Yes | Yes |
| X470 | Accidental poisoning by and exposure to other gases and vapour | Yes | Yes |
| X471 | Accidental poisoning by and exposure to other gases and vapour | Yes | Yes |
| X472 | Accidental poisoning by and exposure to other gases and vapour | Yes | Yes |
| X473 | Accidental poisoning by and exposure to other gases and vapour | Yes | Yes |
| X474 | Accidental poisoning by and exposure to other gases and vapour | Yes | Yes |
| X475 | Accidental poisoning by and exposure to other gases and vapour | Yes | Yes |
| X476 | Accidental poisoning by and exposure to other gases and vapour | Yes | Yes |
| X477 | Accidental poisoning by and exposure to other gases and vapour | Yes | Yes |
| X478 | Accidental poisoning by and exposure to other gases and vapour | Yes | Yes |
| X479 | Accidental poisoning by and exposure to other gases and vapour | Yes | Yes |
| X48  | Accidental poisoning by and exposure to pesticides             | Yes | Yes |
| X480 | Accidental poisoning by and exposure to pesticides             | Yes | Yes |

|      |                                                                 |     |     |
|------|-----------------------------------------------------------------|-----|-----|
| X481 | Accidental poisoning by and exposure to pesticides              | Yes | Yes |
| X482 | Accidental poisoning by and exposure to pesticides              | Yes | Yes |
| X483 | Accidental poisoning by and exposure to pesticides              | Yes | Yes |
| X484 | Accidental poisoning by and exposure to pesticides              | Yes | Yes |
| X485 | Accidental poisoning by and exposure to pesticides              | Yes | Yes |
| X486 | Accidental poisoning by and exposure to pesticides              | Yes | Yes |
| X487 | Accidental poisoning by and exposure to pesticides              | Yes | Yes |
| X488 | Accidental poisoning by and exposure to pesticides              | Yes | Yes |
| X489 | Accidental poisoning by and exposure to pesticides              | Yes | Yes |
| X49  | Accidental poisoning by and exposure to other and unspecified   | Yes | Yes |
| X490 | Accidental poisoning by and exposure to other and unspecified   | Yes | Yes |
| X491 | Accidental poisoning by and exposure to other and unspecified   | Yes | Yes |
| X492 | Accidental poisoning by and exposure to other and unspecified   | Yes | Yes |
| X493 | Accidental poisoning by and exposure to other and unspecified   | Yes | Yes |
| X494 | Accidental poisoning by and exposure to other and unspecified   | Yes | Yes |
| X495 | Accidental poisoning by and exposure to other and unspecified   | Yes | Yes |
| X496 | Accidental poisoning by and exposure to other and unspecified   | Yes | Yes |
| X497 | Accidental poisoning by and exposure to other and unspecified   | Yes | Yes |
| X498 | Accidental poisoning by and exposure to other and unspecified   | Yes | Yes |
| X499 | Accidental poisoning by and exposure to other and unspecified   | Yes | Yes |
| Y90  | Evidence of alcohol involvement determined by blood alcohol I   | Yes | Yes |
| Y900 | Blood alcohol level of less than 20 mg/100 ml                   | Yes | Yes |
| Y901 | Blood alcohol level of 20-39 mg/100 ml                          | Yes | Yes |
| Y902 | Blood alcohol level of 40-59 mg/100 ml                          | Yes | Yes |
| Y903 | Blood alcohol level of 60-79 mg/100 ml                          | Yes | Yes |
| Y904 | Blood alcohol level of 80-99 mg/100 ml                          | Yes | Yes |
| Y905 | Blood alcohol level of 100-119 mg/100 ml                        | Yes | Yes |
| Y906 | Blood alcohol level of 120-199 mg/100 ml                        | Yes | Yes |
| Y907 | Blood alcohol level of 200-239 mg/100 ml                        | Yes | Yes |
| Y908 | Blood alcohol level of 240 mg/100 ml or more                    | Yes | Yes |
| Y909 | Presence of alcohol in blood, level not specified               | Yes | Yes |
| Y91  | Evidence of alcohol involvement determined by level of intoxic  | Yes | Yes |
| Y910 | Mild alcohol intoxication                                       | Yes | Yes |
| Y911 | Moderate alcohol intoxication                                   | Yes | Yes |
| Y912 | Severe alcohol intoxication                                     | Yes | Yes |
| Y913 | Very severe alcohol intoxication                                | Yes | Yes |
| Y919 | Alcohol involvement, not otherwise specified                    | Yes | Yes |
| S143 | Injury of brachial plexus                                       | Yes | No  |
| T270 | Burn of larynx and trachea                                      | Yes | No  |
| T271 | Burn involving larynx and trachea with lung                     | Yes | No  |
| T272 | Burn of other parts of respiratory tract                        | Yes | No  |
| T273 | Burn of respiratory tract, part unspecified                     | Yes | No  |
| T63  | Toxic effect of contact with venomous animals                   | Yes | No  |
| T630 | Toxic effect: Snake venom                                       | Yes | No  |
| T631 | Toxic effect: Venom of other reptiles                           | Yes | No  |
| T632 | Toxic effect: Venom of scorpion                                 | Yes | No  |
| T633 | Toxic effect: Venom of spider                                   | Yes | No  |
| T634 | Toxic effect: Venom of other arthropods                         | Yes | No  |
| T635 | Toxic effect: Toxic effect of contact with fish                 | Yes | No  |
| T636 | Toxic effect: Toxic effect of contact with other marine animals | Yes | No  |
| T638 | Toxic effect: Toxic effect of contact with other venomous anim: | Yes | No  |
| T639 | Toxic effect: Toxic effect of contact with unspecified venomous | Yes | No  |
| T69  | Other effects of reduced temperature                            | Yes | No  |

|      |                                                                   |     |    |
|------|-------------------------------------------------------------------|-----|----|
| T690 | Immersion hand and foot                                           | Yes | No |
| T71X | Asphyxiation                                                      | Yes | No |
| T754 | Effects of electric current                                       | Yes | No |
| W00  | Fall on same level involving ice and snow                         | Yes | No |
| W000 | Fall on same level involving ice and snow                         | Yes | No |
| W001 | Fall on same level involving ice and snow                         | Yes | No |
| W002 | Fall on same level involving ice and snow                         | Yes | No |
| W003 | Fall on same level involving ice and snow                         | Yes | No |
| W004 | Fall on same level involving ice and snow                         | Yes | No |
| W005 | Fall on same level involving ice and snow                         | Yes | No |
| W006 | Fall on same level involving ice and snow                         | Yes | No |
| W007 | Fall on same level involving ice and snow                         | Yes | No |
| W008 | Fall on same level involving ice and snow                         | Yes | No |
| W009 | Fall on same level involving ice and snow                         | Yes | No |
| W01  | Fall on same level from slipping, tripping and stumbling          | Yes | No |
| W010 | Fall on same level from slipping, tripping and stumbling          | Yes | No |
| W011 | Fall on same level from slipping, tripping and stumbling          | Yes | No |
| W012 | Fall on same level from slipping, tripping and stumbling          | Yes | No |
| W013 | Fall on same level from slipping, tripping and stumbling          | Yes | No |
| W014 | Fall on same level from slipping, tripping and stumbling          | Yes | No |
| W015 | Fall on same level from slipping, tripping and stumbling          | Yes | No |
| W016 | Fall on same level from slipping, tripping and stumbling          | Yes | No |
| W017 | Fall on same level from slipping, tripping and stumbling          | Yes | No |
| W018 | Fall on same level from slipping, tripping and stumbling          | Yes | No |
| W019 | Fall on same level from slipping, tripping and stumbling          | Yes | No |
| W03  | Other fall on same level due to collision with, or pushing by, an | Yes | No |
| W030 | Other fall on same level due to collision with, or pushing by, an | Yes | No |
| W031 | Other fall on same level due to collision with, or pushing by, an | Yes | No |
| W032 | Other fall on same level due to collision with, or pushing by, an | Yes | No |
| W033 | Other fall on same level due to collision with, or pushing by, an | Yes | No |
| W034 | Other fall on same level due to collision with, or pushing by, an | Yes | No |
| W035 | Other fall on same level due to collision with, or pushing by, an | Yes | No |
| W036 | Other fall on same level due to collision with, or pushing by, an | Yes | No |
| W037 | Other fall on same level due to collision with, or pushing by, an | Yes | No |
| W038 | Other fall on same level due to collision with, or pushing by, an | Yes | No |
| W039 | Other fall on same level due to collision with, or pushing by, an | Yes | No |
| W04  | Fall while being carried or supported by other persons            | Yes | No |
| W040 | Fall while being carried or supported by other persons            | Yes | No |
| W041 | Fall while being carried or supported by other persons            | Yes | No |
| W042 | Fall while being carried or supported by other persons            | Yes | No |
| W043 | Fall while being carried or supported by other persons            | Yes | No |
| W044 | Fall while being carried or supported by other persons            | Yes | No |
| W045 | Fall while being carried or supported by other persons            | Yes | No |
| W046 | Fall while being carried or supported by other persons            | Yes | No |
| W047 | Fall while being carried or supported by other persons            | Yes | No |
| W048 | Fall while being carried or supported by other persons            | Yes | No |
| W049 | Fall while being carried or supported by other persons            | Yes | No |
| W05  | Fall involving wheelchair                                         | Yes | No |
| W050 | Fall involving wheelchair                                         | Yes | No |
| W051 | Fall involving wheelchair                                         | Yes | No |
| W052 | Fall involving wheelchair                                         | Yes | No |
| W053 | Fall involving wheelchair                                         | Yes | No |
| W054 | Fall involving wheelchair                                         | Yes | No |

|      |                                |     |    |
|------|--------------------------------|-----|----|
| W055 | Fall involving wheelchair      | Yes | No |
| W056 | Fall involving wheelchair      | Yes | No |
| W057 | Fall involving wheelchair      | Yes | No |
| W058 | Fall involving wheelchair      | Yes | No |
| W059 | Fall involving wheelchair      | Yes | No |
| W06  | Fall involving bed             | Yes | No |
| W060 | Fall involving bed             | Yes | No |
| W061 | Fall involving bed             | Yes | No |
| W062 | Fall involving bed             | Yes | No |
| W063 | Fall involving bed             | Yes | No |
| W064 | Fall involving bed             | Yes | No |
| W065 | Fall involving bed             | Yes | No |
| W066 | Fall involving bed             | Yes | No |
| W067 | Fall involving bed             | Yes | No |
| W068 | Fall involving bed             | Yes | No |
| W069 | Fall involving bed             | Yes | No |
| W07  | Fall involving chair           | Yes | No |
| W070 | Fall involving chair           | Yes | No |
| W071 | Fall involving chair           | Yes | No |
| W072 | Fall involving chair           | Yes | No |
| W073 | Fall involving chair           | Yes | No |
| W074 | Fall involving chair           | Yes | No |
| W075 | Fall involving chair           | Yes | No |
| W076 | Fall involving chair           | Yes | No |
| W077 | Fall involving chair           | Yes | No |
| W078 | Fall involving chair           | Yes | No |
| W079 | Fall involving chair           | Yes | No |
| W08  | Fall involving other furniture | Yes | No |
| W080 | Fall involving other furniture | Yes | No |
| W081 | Fall involving other furniture | Yes | No |
| W082 | Fall involving other furniture | Yes | No |
| W083 | Fall involving other furniture | Yes | No |
| W084 | Fall involving other furniture | Yes | No |
| W085 | Fall involving other furniture | Yes | No |
| W086 | Fall involving other furniture | Yes | No |
| W087 | Fall involving other furniture | Yes | No |
| W088 | Fall involving other furniture | Yes | No |
| W089 | Fall involving other furniture | Yes | No |
| W11  | Fall on and from ladder        | Yes | No |
| W110 | Fall on and from ladder        | Yes | No |
| W111 | Fall on and from ladder        | Yes | No |
| W112 | Fall on and from ladder        | Yes | No |
| W113 | Fall on and from ladder        | Yes | No |
| W114 | Fall on and from ladder        | Yes | No |
| W115 | Fall on and from ladder        | Yes | No |
| W116 | Fall on and from ladder        | Yes | No |
| W117 | Fall on and from ladder        | Yes | No |
| W118 | Fall on and from ladder        | Yes | No |
| W119 | Fall on and from ladder        | Yes | No |
| W12  | Fall on and from scaffolding   | Yes | No |
| W120 | Fall on and from scaffolding   | Yes | No |
| W121 | Fall on and from scaffolding   | Yes | No |
| W122 | Fall on and from scaffolding   | Yes | No |

|      |                                               |     |    |
|------|-----------------------------------------------|-----|----|
| W123 | Fall on and from scaffolding                  | Yes | No |
| W124 | Fall on and from scaffolding                  | Yes | No |
| W125 | Fall on and from scaffolding                  | Yes | No |
| W126 | Fall on and from scaffolding                  | Yes | No |
| W127 | Fall on and from scaffolding                  | Yes | No |
| W128 | Fall on and from scaffolding                  | Yes | No |
| W129 | Fall on and from scaffolding                  | Yes | No |
| W14  | Fall from tree                                | Yes | No |
| W140 | Fall from tree                                | Yes | No |
| W141 | Fall from tree                                | Yes | No |
| W142 | Fall from tree                                | Yes | No |
| W143 | Fall from tree                                | Yes | No |
| W144 | Fall from tree                                | Yes | No |
| W145 | Fall from tree                                | Yes | No |
| W146 | Fall from tree                                | Yes | No |
| W147 | Fall from tree                                | Yes | No |
| W148 | Fall from tree                                | Yes | No |
| W149 | Fall from tree                                | Yes | No |
| W17  | Other fall from one level to another          | Yes | No |
| W170 | Other fall from one level to another          | Yes | No |
| W171 | Other fall from one level to another          | Yes | No |
| W172 | Other fall from one level to another          | Yes | No |
| W173 | Other fall from one level to another          | Yes | No |
| W174 | Other fall from one level to another          | Yes | No |
| W175 | Other fall from one level to another          | Yes | No |
| W176 | Other fall from one level to another          | Yes | No |
| W177 | Other fall from one level to another          | Yes | No |
| W178 | Other fall from one level to another          | Yes | No |
| W179 | Other fall from one level to another          | Yes | No |
| W18  | Other fall on same level                      | Yes | No |
| W180 | Other fall on same level                      | Yes | No |
| W181 | Other fall on same level                      | Yes | No |
| W182 | Other fall on same level                      | Yes | No |
| W183 | Other fall on same level                      | Yes | No |
| W184 | Other fall on same level                      | Yes | No |
| W185 | Other fall on same level                      | Yes | No |
| W186 | Other fall on same level                      | Yes | No |
| W187 | Other fall on same level                      | Yes | No |
| W188 | Other fall on same level                      | Yes | No |
| W189 | Other fall on same level                      | Yes | No |
| W19  | Unspecified fall                              | Yes | No |
| W190 | Unspecified fall                              | Yes | No |
| W191 | Unspecified fall                              | Yes | No |
| W192 | Unspecified fall                              | Yes | No |
| W193 | Unspecified fall                              | Yes | No |
| W194 | Unspecified fall                              | Yes | No |
| W195 | Unspecified fall                              | Yes | No |
| W196 | Unspecified fall                              | Yes | No |
| W197 | Unspecified fall                              | Yes | No |
| W198 | Unspecified fall                              | Yes | No |
| W199 | Unspecified fall                              | Yes | No |
| W20  | Struck by thrown, projected or falling object | Yes | No |
| W200 | Struck by thrown, projected or falling object | Yes | No |



|      |                                                                 |     |    |
|------|-----------------------------------------------------------------|-----|----|
| W201 | Struck by thrown, projected or falling object                   | Yes | No |
| W202 | Struck by thrown, projected or falling object                   | Yes | No |
| W203 | Struck by thrown, projected or falling object                   | Yes | No |
| W204 | Struck by thrown, projected or falling object                   | Yes | No |
| W205 | Struck by thrown, projected or falling object                   | Yes | No |
| W206 | Struck by thrown, projected or falling object                   | Yes | No |
| W207 | Struck by thrown, projected or falling object                   | Yes | No |
| W208 | Struck by thrown, projected or falling object                   | Yes | No |
| W209 | Struck by thrown, projected or falling object                   | Yes | No |
| W21  | Striking against or struck by sports equipment                  | Yes | No |
| W210 | Striking against or struck by sports equipment                  | Yes | No |
| W211 | Striking against or struck by sports equipment                  | Yes | No |
| W212 | Striking against or struck by sports equipment                  | Yes | No |
| W213 | Striking against or struck by sports equipment                  | Yes | No |
| W214 | Striking against or struck by sports equipment                  | Yes | No |
| W215 | Striking against or struck by sports equipment                  | Yes | No |
| W216 | Striking against or struck by sports equipment                  | Yes | No |
| W217 | Striking against or struck by sports equipment                  | Yes | No |
| W218 | Striking against or struck by sports equipment                  | Yes | No |
| W219 | Striking against or struck by sports equipment                  | Yes | No |
| W22  | Striking against or struck by other objects                     | Yes | No |
| W220 | Striking against or struck by other objects                     | Yes | No |
| W221 | Striking against or struck by other objects                     | Yes | No |
| W222 | Striking against or struck by other objects                     | Yes | No |
| W223 | Striking against or struck by other objects                     | Yes | No |
| W224 | Striking against or struck by other objects                     | Yes | No |
| W225 | Striking against or struck by other objects                     | Yes | No |
| W226 | Striking against or struck by other objects                     | Yes | No |
| W227 | Striking against or struck by other objects                     | Yes | No |
| W228 | Striking against or struck by other objects                     | Yes | No |
| W229 | Striking against or struck by other objects                     | Yes | No |
| W23  | Caught, crushed, jammed or pinched in or between objects        | Yes | No |
| W230 | Caught, crushed, jammed or pinched in or between objects        | Yes | No |
| W231 | Caught, crushed, jammed or pinched in or between objects        | Yes | No |
| W232 | Caught, crushed, jammed or pinched in or between objects        | Yes | No |
| W233 | Caught, crushed, jammed or pinched in or between objects        | Yes | No |
| W234 | Caught, crushed, jammed or pinched in or between objects        | Yes | No |
| W235 | Caught, crushed, jammed or pinched in or between objects        | Yes | No |
| W236 | Caught, crushed, jammed or pinched in or between objects        | Yes | No |
| W237 | Caught, crushed, jammed or pinched in or between objects        | Yes | No |
| W238 | Caught, crushed, jammed or pinched in or between objects        | Yes | No |
| W239 | Caught, crushed, jammed or pinched in or between objects        | Yes | No |
| W24  | Contact with lifting and transmission devices, not elsewhere cl | Yes | No |
| W240 | Contact with lifting and transmission devices, not elsewhere cl | Yes | No |
| W241 | Contact with lifting and transmission devices, not elsewhere cl | Yes | No |
| W242 | Contact with lifting and transmission devices, not elsewhere cl | Yes | No |
| W243 | Contact with lifting and transmission devices, not elsewhere cl | Yes | No |
| W244 | Contact with lifting and transmission devices, not elsewhere cl | Yes | No |
| W245 | Contact with lifting and transmission devices, not elsewhere cl | Yes | No |
| W246 | Contact with lifting and transmission devices, not elsewhere cl | Yes | No |
| W247 | Contact with lifting and transmission devices, not elsewhere cl | Yes | No |
| W248 | Contact with lifting and transmission devices, not elsewhere cl | Yes | No |
| W249 | Contact with lifting and transmission devices, not elsewhere cl | Yes | No |

|      |                                                            |     |    |
|------|------------------------------------------------------------|-----|----|
| W25  | Contact with sharp glass                                   | Yes | No |
| W250 | Contact with sharp glass                                   | Yes | No |
| W251 | Contact with sharp glass                                   | Yes | No |
| W252 | Contact with sharp glass                                   | Yes | No |
| W253 | Contact with sharp glass                                   | Yes | No |
| W254 | Contact with sharp glass                                   | Yes | No |
| W255 | Contact with sharp glass                                   | Yes | No |
| W256 | Contact with sharp glass                                   | Yes | No |
| W257 | Contact with sharp glass                                   | Yes | No |
| W258 | Contact with sharp glass                                   | Yes | No |
| W259 | Contact with sharp glass                                   | Yes | No |
| W26  | Contact with knife, sword or dagger                        | Yes | No |
| W260 | Contact with knife, sword or dagger                        | Yes | No |
| W261 | Contact with knife, sword or dagger                        | Yes | No |
| W262 | Contact with knife, sword or dagger                        | Yes | No |
| W263 | Contact with knife, sword or dagger                        | Yes | No |
| W264 | Contact with knife, sword or dagger                        | Yes | No |
| W265 | Contact with knife, sword or dagger                        | Yes | No |
| W266 | Contact with knife, sword or dagger                        | Yes | No |
| W267 | Contact with knife, sword or dagger                        | Yes | No |
| W268 | Contact with knife, sword or dagger                        | Yes | No |
| W269 | Contact with knife, sword or dagger                        | Yes | No |
| W27  | Contact with nonpowered hand tool                          | Yes | No |
| W270 | Contact with nonpowered hand tool                          | Yes | No |
| W271 | Contact with nonpowered hand tool                          | Yes | No |
| W272 | Contact with nonpowered hand tool                          | Yes | No |
| W273 | Contact with nonpowered hand tool                          | Yes | No |
| W274 | Contact with nonpowered hand tool                          | Yes | No |
| W275 | Contact with nonpowered hand tool                          | Yes | No |
| W276 | Contact with nonpowered hand tool                          | Yes | No |
| W277 | Contact with nonpowered hand tool                          | Yes | No |
| W278 | Contact with nonpowered hand tool                          | Yes | No |
| W279 | Contact with nonpowered hand tool                          | Yes | No |
| W28  | Contact with powered lawnmower                             | Yes | No |
| W280 | Contact with powered lawnmower                             | Yes | No |
| W281 | Contact with powered lawnmower                             | Yes | No |
| W282 | Contact with powered lawnmower                             | Yes | No |
| W283 | Contact with powered lawnmower                             | Yes | No |
| W284 | Contact with powered lawnmower                             | Yes | No |
| W285 | Contact with powered lawnmower                             | Yes | No |
| W286 | Contact with powered lawnmower                             | Yes | No |
| W287 | Contact with powered lawnmower                             | Yes | No |
| W288 | Contact with powered lawnmower                             | Yes | No |
| W289 | Contact with powered lawnmower                             | Yes | No |
| W29  | Contact with other powered hand tools and household machin | Yes | No |
| W290 | Contact with other powered hand tools and household machin | Yes | No |
| W291 | Contact with other powered hand tools and household machin | Yes | No |
| W292 | Contact with other powered hand tools and household machin | Yes | No |
| W293 | Contact with other powered hand tools and household machin | Yes | No |
| W294 | Contact with other powered hand tools and household machin | Yes | No |
| W295 | Contact with other powered hand tools and household machin | Yes | No |
| W296 | Contact with other powered hand tools and household machin | Yes | No |
| W297 | Contact with other powered hand tools and household machin | Yes | No |

|      |                                                            |     |    |
|------|------------------------------------------------------------|-----|----|
| W298 | Contact with other powered hand tools and household machin | Yes | No |
| W299 | Contact with other powered hand tools and household machin | Yes | No |
| W30  | Contact with agricultural machinery                        | Yes | No |
| W300 | Contact with agricultural machinery                        | Yes | No |
| W301 | Contact with agricultural machinery                        | Yes | No |
| W302 | Contact with agricultural machinery                        | Yes | No |
| W303 | Contact with agricultural machinery                        | Yes | No |
| W304 | Contact with agricultural machinery                        | Yes | No |
| W305 | Contact with agricultural machinery                        | Yes | No |
| W306 | Contact with agricultural machinery                        | Yes | No |
| W307 | Contact with agricultural machinery                        | Yes | No |
| W308 | Contact with agricultural machinery                        | Yes | No |
| W309 | Contact with agricultural machinery                        | Yes | No |
| W31  | Contact with other and unspecified machinery               | Yes | No |
| W310 | Contact with other and unspecified machinery               | Yes | No |
| W311 | Contact with other and unspecified machinery               | Yes | No |
| W312 | Contact with other and unspecified machinery               | Yes | No |
| W313 | Contact with other and unspecified machinery               | Yes | No |
| W314 | Contact with other and unspecified machinery               | Yes | No |
| W315 | Contact with other and unspecified machinery               | Yes | No |
| W316 | Contact with other and unspecified machinery               | Yes | No |
| W317 | Contact with other and unspecified machinery               | Yes | No |
| W318 | Contact with other and unspecified machinery               | Yes | No |
| W319 | Contact with other and unspecified machinery               | Yes | No |
| W32  | Handgun discharge                                          | Yes | No |
| W320 | Handgun discharge                                          | Yes | No |
| W321 | Handgun discharge                                          | Yes | No |
| W322 | Handgun discharge                                          | Yes | No |
| W323 | Handgun discharge                                          | Yes | No |
| W324 | Handgun discharge                                          | Yes | No |
| W325 | Handgun discharge                                          | Yes | No |
| W326 | Handgun discharge                                          | Yes | No |
| W327 | Handgun discharge                                          | Yes | No |
| W328 | Handgun discharge                                          | Yes | No |
| W329 | Handgun discharge                                          | Yes | No |
| W33  | Rifle, shotgun and larger firearm discharge                | Yes | No |
| W330 | Rifle, shotgun and larger firearm discharge                | Yes | No |
| W331 | Rifle, shotgun and larger firearm discharge                | Yes | No |
| W332 | Rifle, shotgun and larger firearm discharge                | Yes | No |
| W333 | Rifle, shotgun and larger firearm discharge                | Yes | No |
| W334 | Rifle, shotgun and larger firearm discharge                | Yes | No |
| W335 | Rifle, shotgun and larger firearm discharge                | Yes | No |
| W336 | Rifle, shotgun and larger firearm discharge                | Yes | No |
| W337 | Rifle, shotgun and larger firearm discharge                | Yes | No |
| W338 | Rifle, shotgun and larger firearm discharge                | Yes | No |
| W339 | Rifle, shotgun and larger firearm discharge                | Yes | No |
| W34  | Discharge from other and unspecified firearms              | Yes | No |
| W340 | Discharge from other and unspecified firearms              | Yes | No |
| W341 | Discharge from other and unspecified firearms              | Yes | No |
| W342 | Discharge from other and unspecified firearms              | Yes | No |
| W343 | Discharge from other and unspecified firearms              | Yes | No |
| W344 | Discharge from other and unspecified firearms              | Yes | No |
| W345 | Discharge from other and unspecified firearms              | Yes | No |

|      |                                                              |     |    |
|------|--------------------------------------------------------------|-----|----|
| W346 | Discharge from other and unspecified firearms                | Yes | No |
| W347 | Discharge from other and unspecified firearms                | Yes | No |
| W348 | Discharge from other and unspecified firearms                | Yes | No |
| W349 | Discharge from other and unspecified firearms                | Yes | No |
| W35  | Explosion and rupture of boiler                              | Yes | No |
| W350 | Explosion and rupture of boiler                              | Yes | No |
| W351 | Explosion and rupture of boiler                              | Yes | No |
| W352 | Explosion and rupture of boiler                              | Yes | No |
| W353 | Explosion and rupture of boiler                              | Yes | No |
| W354 | Explosion and rupture of boiler                              | Yes | No |
| W355 | Explosion and rupture of boiler                              | Yes | No |
| W356 | Explosion and rupture of boiler                              | Yes | No |
| W357 | Explosion and rupture of boiler                              | Yes | No |
| W358 | Explosion and rupture of boiler                              | Yes | No |
| W359 | Explosion and rupture of boiler                              | Yes | No |
| W36  | Explosion and rupture of gas cylinder                        | Yes | No |
| W360 | Explosion and rupture of gas cylinder                        | Yes | No |
| W361 | Explosion and rupture of gas cylinder                        | Yes | No |
| W362 | Explosion and rupture of gas cylinder                        | Yes | No |
| W363 | Explosion and rupture of gas cylinder                        | Yes | No |
| W364 | Explosion and rupture of gas cylinder                        | Yes | No |
| W365 | Explosion and rupture of gas cylinder                        | Yes | No |
| W366 | Explosion and rupture of gas cylinder                        | Yes | No |
| W367 | Explosion and rupture of gas cylinder                        | Yes | No |
| W368 | Explosion and rupture of gas cylinder                        | Yes | No |
| W369 | Explosion and rupture of gas cylinder                        | Yes | No |
| W37  | Explosion and rupture of pressurized tyre, pipe or hose      | Yes | No |
| W370 | Explosion and rupture of pressurized tyre, pipe or hose      | Yes | No |
| W371 | Explosion and rupture of pressurized tyre, pipe or hose      | Yes | No |
| W372 | Explosion and rupture of pressurized tyre, pipe or hose      | Yes | No |
| W373 | Explosion and rupture of pressurized tyre, pipe or hose      | Yes | No |
| W374 | Explosion and rupture of pressurized tyre, pipe or hose      | Yes | No |
| W375 | Explosion and rupture of pressurized tyre, pipe or hose      | Yes | No |
| W376 | Explosion and rupture of pressurized tyre, pipe or hose      | Yes | No |
| W377 | Explosion and rupture of pressurized tyre, pipe or hose      | Yes | No |
| W378 | Explosion and rupture of pressurized tyre, pipe or hose      | Yes | No |
| W379 | Explosion and rupture of pressurized tyre, pipe or hose      | Yes | No |
| W38  | Explosion and rupture of other specified pressurized devices | Yes | No |
| W380 | Explosion and rupture of other specified pressurized devices | Yes | No |
| W381 | Explosion and rupture of other specified pressurized devices | Yes | No |
| W382 | Explosion and rupture of other specified pressurized devices | Yes | No |
| W383 | Explosion and rupture of other specified pressurized devices | Yes | No |
| W384 | Explosion and rupture of other specified pressurized devices | Yes | No |
| W385 | Explosion and rupture of other specified pressurized devices | Yes | No |
| W386 | Explosion and rupture of other specified pressurized devices | Yes | No |
| W387 | Explosion and rupture of other specified pressurized devices | Yes | No |
| W388 | Explosion and rupture of other specified pressurized devices | Yes | No |
| W389 | Explosion and rupture of other specified pressurized devices | Yes | No |
| W39  | Discharge of firework                                        | Yes | No |
| W390 | Discharge of firework                                        | Yes | No |
| W391 | Discharge of firework                                        | Yes | No |
| W392 | Discharge of firework                                        | Yes | No |
| W393 | Discharge of firework                                        | Yes | No |

|      |                                                              |     |    |
|------|--------------------------------------------------------------|-----|----|
| W394 | Discharge of firework                                        | Yes | No |
| W395 | Discharge of firework                                        | Yes | No |
| W396 | Discharge of firework                                        | Yes | No |
| W397 | Discharge of firework                                        | Yes | No |
| W398 | Discharge of firework                                        | Yes | No |
| W399 | Discharge of firework                                        | Yes | No |
| W40  | Explosion of other materials                                 | Yes | No |
| W400 | Explosion of other materials                                 | Yes | No |
| W401 | Explosion of other materials                                 | Yes | No |
| W402 | Explosion of other materials                                 | Yes | No |
| W403 | Explosion of other materials                                 | Yes | No |
| W404 | Explosion of other materials                                 | Yes | No |
| W405 | Explosion of other materials                                 | Yes | No |
| W406 | Explosion of other materials                                 | Yes | No |
| W407 | Explosion of other materials                                 | Yes | No |
| W408 | Explosion of other materials                                 | Yes | No |
| W409 | Explosion of other materials                                 | Yes | No |
| W41  | Exposure to high-pressure jet                                | Yes | No |
| W410 | Exposure to high-pressure jet                                | Yes | No |
| W411 | Exposure to high-pressure jet                                | Yes | No |
| W412 | Exposure to high-pressure jet                                | Yes | No |
| W413 | Exposure to high-pressure jet                                | Yes | No |
| W414 | Exposure to high-pressure jet                                | Yes | No |
| W415 | Exposure to high-pressure jet                                | Yes | No |
| W416 | Exposure to high-pressure jet                                | Yes | No |
| W417 | Exposure to high-pressure jet                                | Yes | No |
| W418 | Exposure to high-pressure jet                                | Yes | No |
| W419 | Exposure to high-pressure jet                                | Yes | No |
| W42  | Exposure to noise                                            | Yes | No |
| W420 | Exposure to noise                                            | Yes | No |
| W421 | Exposure to noise                                            | Yes | No |
| W422 | Exposure to noise                                            | Yes | No |
| W423 | Exposure to noise                                            | Yes | No |
| W424 | Exposure to noise                                            | Yes | No |
| W425 | Exposure to noise                                            | Yes | No |
| W426 | Exposure to noise                                            | Yes | No |
| W427 | Exposure to noise                                            | Yes | No |
| W428 | Exposure to noise                                            | Yes | No |
| W429 | Exposure to noise                                            | Yes | No |
| W43  | Exposure to vibration                                        | Yes | No |
| W430 | Exposure to vibration                                        | Yes | No |
| W431 | Exposure to vibration                                        | Yes | No |
| W432 | Exposure to vibration                                        | Yes | No |
| W433 | Exposure to vibration                                        | Yes | No |
| W434 | Exposure to vibration                                        | Yes | No |
| W435 | Exposure to vibration                                        | Yes | No |
| W436 | Exposure to vibration                                        | Yes | No |
| W437 | Exposure to vibration                                        | Yes | No |
| W438 | Exposure to vibration                                        | Yes | No |
| W439 | Exposure to vibration                                        | Yes | No |
| W44  | Foreign body entering into or through eye or natural orifice | Yes | No |
| W440 | Foreign body entering into or through eye or natural orifice | Yes | No |
| W441 | Foreign body entering into or through eye or natural orifice | Yes | No |

|      |                                                                   |     |    |
|------|-------------------------------------------------------------------|-----|----|
| W442 | Foreign body entering into or through eye or natural orifice      | Yes | No |
| W443 | Foreign body entering into or through eye or natural orifice      | Yes | No |
| W444 | Foreign body entering into or through eye or natural orifice      | Yes | No |
| W445 | Foreign body entering into or through eye or natural orifice      | Yes | No |
| W446 | Foreign body entering into or through eye or natural orifice      | Yes | No |
| W447 | Foreign body entering into or through eye or natural orifice      | Yes | No |
| W448 | Foreign body entering into or through eye or natural orifice      | Yes | No |
| W449 | Foreign body entering into or through eye or natural orifice      | Yes | No |
| W45  | Foreign body or object entering through skin                      | Yes | No |
| W450 | Foreign body or object entering through skin                      | Yes | No |
| W451 | Foreign body or object entering through skin                      | Yes | No |
| W452 | Foreign body or object entering through skin                      | Yes | No |
| W453 | Foreign body or object entering through skin                      | Yes | No |
| W454 | Foreign body or object entering through skin                      | Yes | No |
| W455 | Foreign body or object entering through skin                      | Yes | No |
| W456 | Foreign body or object entering through skin                      | Yes | No |
| W457 | Foreign body or object entering through skin                      | Yes | No |
| W458 | Foreign body or object entering through skin                      | Yes | No |
| W459 | Foreign body or object entering through skin                      | Yes | No |
| W46  | Contact with hypodermic needle                                    | Yes | No |
| W460 | Contact with hypodermic needle                                    | Yes | No |
| W461 | Contact with hypodermic needle                                    | Yes | No |
| W462 | Contact with hypodermic needle                                    | Yes | No |
| W463 | Contact with hypodermic needle                                    | Yes | No |
| W464 | Contact with hypodermic needle                                    | Yes | No |
| W465 | Contact with hypodermic needle                                    | Yes | No |
| W466 | Contact with hypodermic needle                                    | Yes | No |
| W467 | Contact with hypodermic needle                                    | Yes | No |
| W468 | Contact with hypodermic needle                                    | Yes | No |
| W469 | Contact with hypodermic needle                                    | Yes | No |
| W49  | Exposure to other and unspecified inanimate mechanical force: Yes |     | No |
| W490 | Exposure to other and unspecified inanimate mechanical force: Yes |     | No |
| W491 | Exposure to other and unspecified inanimate mechanical force: Yes |     | No |
| W492 | Exposure to other and unspecified inanimate mechanical force: Yes |     | No |
| W493 | Exposure to other and unspecified inanimate mechanical force: Yes |     | No |
| W494 | Exposure to other and unspecified inanimate mechanical force: Yes |     | No |
| W495 | Exposure to other and unspecified inanimate mechanical force: Yes |     | No |
| W496 | Exposure to other and unspecified inanimate mechanical force: Yes |     | No |
| W497 | Exposure to other and unspecified inanimate mechanical force: Yes |     | No |
| W498 | Exposure to other and unspecified inanimate mechanical force: Yes |     | No |
| W499 | Exposure to other and unspecified inanimate mechanical force: Yes |     | No |
| W50  | Hit, struck, kicked, twisted, bitten or scratched by another pers | Yes | No |
| W500 | Hit, struck, kicked, twisted, bitten or scratched by another pers | Yes | No |
| W501 | Hit, struck, kicked, twisted, bitten or scratched by another pers | Yes | No |
| W502 | Hit, struck, kicked, twisted, bitten or scratched by another pers | Yes | No |
| W503 | Hit, struck, kicked, twisted, bitten or scratched by another pers | Yes | No |
| W504 | Hit, struck, kicked, twisted, bitten or scratched by another pers | Yes | No |
| W505 | Hit, struck, kicked, twisted, bitten or scratched by another pers | Yes | No |
| W506 | Hit, struck, kicked, twisted, bitten or scratched by another pers | Yes | No |
| W507 | Hit, struck, kicked, twisted, bitten or scratched by another pers | Yes | No |
| W508 | Hit, struck, kicked, twisted, bitten or scratched by another pers | Yes | No |
| W509 | Hit, struck, kicked, twisted, bitten or scratched by another pers | Yes | No |
| W51  | Striking against or bumped into by another person                 | Yes | No |

|      |                                                   |     |    |
|------|---------------------------------------------------|-----|----|
| W510 | Striking against or bumped into by another person | Yes | No |
| W511 | Striking against or bumped into by another person | Yes | No |
| W512 | Striking against or bumped into by another person | Yes | No |
| W513 | Striking against or bumped into by another person | Yes | No |
| W514 | Striking against or bumped into by another person | Yes | No |
| W515 | Striking against or bumped into by another person | Yes | No |
| W516 | Striking against or bumped into by another person | Yes | No |
| W517 | Striking against or bumped into by another person | Yes | No |
| W518 | Striking against or bumped into by another person | Yes | No |
| W519 | Striking against or bumped into by another person | Yes | No |
| W53  | Bitten by rat                                     | Yes | No |
| W530 | Bitten by rat                                     | Yes | No |
| W531 | Bitten by rat                                     | Yes | No |
| W532 | Bitten by rat                                     | Yes | No |
| W533 | Bitten by rat                                     | Yes | No |
| W534 | Bitten by rat                                     | Yes | No |
| W535 | Bitten by rat                                     | Yes | No |
| W536 | Bitten by rat                                     | Yes | No |
| W537 | Bitten by rat                                     | Yes | No |
| W538 | Bitten by rat                                     | Yes | No |
| W539 | Bitten by rat                                     | Yes | No |
| W54  | Bitten or struck by dog                           | Yes | No |
| W540 | Bitten or struck by dog                           | Yes | No |
| W541 | Bitten or struck by dog                           | Yes | No |
| W542 | Bitten or struck by dog                           | Yes | No |
| W543 | Bitten or struck by dog                           | Yes | No |
| W544 | Bitten or struck by dog                           | Yes | No |
| W545 | Bitten or struck by dog                           | Yes | No |
| W546 | Bitten or struck by dog                           | Yes | No |
| W547 | Bitten or struck by dog                           | Yes | No |
| W548 | Bitten or struck by dog                           | Yes | No |
| W549 | Bitten or struck by dog                           | Yes | No |
| W55  | Bitten or struck by other mammals                 | Yes | No |
| W550 | Bitten or struck by other mammals                 | Yes | No |
| W551 | Bitten or struck by other mammals                 | Yes | No |
| W552 | Bitten or struck by other mammals                 | Yes | No |
| W553 | Bitten or struck by other mammals                 | Yes | No |
| W554 | Bitten or struck by other mammals                 | Yes | No |
| W555 | Bitten or struck by other mammals                 | Yes | No |
| W556 | Bitten or struck by other mammals                 | Yes | No |
| W557 | Bitten or struck by other mammals                 | Yes | No |
| W558 | Bitten or struck by other mammals                 | Yes | No |
| W559 | Bitten or struck by other mammals                 | Yes | No |
| W56  | Contact with marine animal                        | Yes | No |
| W560 | Contact with marine animal                        | Yes | No |
| W561 | Contact with marine animal                        | Yes | No |
| W562 | Contact with marine animal                        | Yes | No |
| W563 | Contact with marine animal                        | Yes | No |
| W564 | Contact with marine animal                        | Yes | No |
| W565 | Contact with marine animal                        | Yes | No |
| W566 | Contact with marine animal                        | Yes | No |
| W567 | Contact with marine animal                        | Yes | No |
| W568 | Contact with marine animal                        | Yes | No |



|      |                                                             |     |    |
|------|-------------------------------------------------------------|-----|----|
| W569 | Contact with marine animal                                  | Yes | No |
| W57  | Bitten or stung by nonvenomous insect and other nonvenomous | Yes | No |
| W570 | Bitten or stung by nonvenomous insect and other nonvenomous | Yes | No |
| W571 | Bitten or stung by nonvenomous insect and other nonvenomous | Yes | No |
| W572 | Bitten or stung by nonvenomous insect and other nonvenomous | Yes | No |
| W573 | Bitten or stung by nonvenomous insect and other nonvenomous | Yes | No |
| W574 | Bitten or stung by nonvenomous insect and other nonvenomous | Yes | No |
| W575 | Bitten or stung by nonvenomous insect and other nonvenomous | Yes | No |
| W576 | Bitten or stung by nonvenomous insect and other nonvenomous | Yes | No |
| W577 | Bitten or stung by nonvenomous insect and other nonvenomous | Yes | No |
| W578 | Bitten or stung by nonvenomous insect and other nonvenomous | Yes | No |
| W579 | Bitten or stung by nonvenomous insect and other nonvenomous | Yes | No |
| W58  | Bitten or struck by crocodile or alligator                  | Yes | No |
| W580 | Bitten or struck by crocodile or alligator                  | Yes | No |
| W581 | Bitten or struck by crocodile or alligator                  | Yes | No |
| W582 | Bitten or struck by crocodile or alligator                  | Yes | No |
| W583 | Bitten or struck by crocodile or alligator                  | Yes | No |
| W584 | Bitten or struck by crocodile or alligator                  | Yes | No |
| W585 | Bitten or struck by crocodile or alligator                  | Yes | No |
| W586 | Bitten or struck by crocodile or alligator                  | Yes | No |
| W587 | Bitten or struck by crocodile or alligator                  | Yes | No |
| W588 | Bitten or struck by crocodile or alligator                  | Yes | No |
| W589 | Bitten or struck by crocodile or alligator                  | Yes | No |
| W59  | Bitten or crushed by other reptiles                         | Yes | No |
| W590 | Bitten or crushed by other reptiles                         | Yes | No |
| W591 | Bitten or crushed by other reptiles                         | Yes | No |
| W592 | Bitten or crushed by other reptiles                         | Yes | No |
| W593 | Bitten or crushed by other reptiles                         | Yes | No |
| W594 | Bitten or crushed by other reptiles                         | Yes | No |
| W595 | Bitten or crushed by other reptiles                         | Yes | No |
| W596 | Bitten or crushed by other reptiles                         | Yes | No |
| W597 | Bitten or crushed by other reptiles                         | Yes | No |
| W598 | Bitten or crushed by other reptiles                         | Yes | No |
| W599 | Bitten or crushed by other reptiles                         | Yes | No |
| W60  | Contact with plant thorns and spines and sharp leaves       | Yes | No |
| W600 | Contact with plant thorns and spines and sharp leaves       | Yes | No |
| W601 | Contact with plant thorns and spines and sharp leaves       | Yes | No |
| W602 | Contact with plant thorns and spines and sharp leaves       | Yes | No |
| W603 | Contact with plant thorns and spines and sharp leaves       | Yes | No |
| W604 | Contact with plant thorns and spines and sharp leaves       | Yes | No |
| W605 | Contact with plant thorns and spines and sharp leaves       | Yes | No |
| W606 | Contact with plant thorns and spines and sharp leaves       | Yes | No |
| W607 | Contact with plant thorns and spines and sharp leaves       | Yes | No |
| W608 | Contact with plant thorns and spines and sharp leaves       | Yes | No |
| W609 | Contact with plant thorns and spines and sharp leaves       | Yes | No |
| W64  | Exposure to other and unspecified animate mechanical forces | Yes | No |
| W640 | Exposure to other and unspecified animate mechanical forces | Yes | No |
| W641 | Exposure to other and unspecified animate mechanical forces | Yes | No |
| W642 | Exposure to other and unspecified animate mechanical forces | Yes | No |
| W643 | Exposure to other and unspecified animate mechanical forces | Yes | No |
| W644 | Exposure to other and unspecified animate mechanical forces | Yes | No |
| W645 | Exposure to other and unspecified animate mechanical forces | Yes | No |
| W646 | Exposure to other and unspecified animate mechanical forces | Yes | No |

|      |                                                             |     |    |
|------|-------------------------------------------------------------|-----|----|
| W647 | Exposure to other and unspecified animate mechanical forces | Yes | No |
| W648 | Exposure to other and unspecified animate mechanical forces | Yes | No |
| W649 | Exposure to other and unspecified animate mechanical forces | Yes | No |
| W66  | Drowning and submersion following fall into bath-tub        | Yes | No |
| W660 | Drowning and submersion following fall into bath-tub        | Yes | No |
| W661 | Drowning and submersion following fall into bath-tub        | Yes | No |
| W662 | Drowning and submersion following fall into bath-tub        | Yes | No |
| W663 | Drowning and submersion following fall into bath-tub        | Yes | No |
| W664 | Drowning and submersion following fall into bath-tub        | Yes | No |
| W665 | Drowning and submersion following fall into bath-tub        | Yes | No |
| W666 | Drowning and submersion following fall into bath-tub        | Yes | No |
| W667 | Drowning and submersion following fall into bath-tub        | Yes | No |
| W668 | Drowning and submersion following fall into bath-tub        | Yes | No |
| W669 | Drowning and submersion following fall into bath-tub        | Yes | No |
| W67  | Drowning and submersion while in swimming-pool              | Yes | No |
| W670 | Drowning and submersion while in swimming-pool              | Yes | No |
| W671 | Drowning and submersion while in swimming-pool              | Yes | No |
| W672 | Drowning and submersion while in swimming-pool              | Yes | No |
| W673 | Drowning and submersion while in swimming-pool              | Yes | No |
| W674 | Drowning and submersion while in swimming-pool              | Yes | No |
| W675 | Drowning and submersion while in swimming-pool              | Yes | No |
| W676 | Drowning and submersion while in swimming-pool              | Yes | No |
| W677 | Drowning and submersion while in swimming-pool              | Yes | No |
| W678 | Drowning and submersion while in swimming-pool              | Yes | No |
| W679 | Drowning and submersion while in swimming-pool              | Yes | No |
| W68  | Drowning and submersion following fall into swimming-pool   | Yes | No |
| W680 | Drowning and submersion following fall into swimming-pool   | Yes | No |
| W681 | Drowning and submersion following fall into swimming-pool   | Yes | No |
| W682 | Drowning and submersion following fall into swimming-pool   | Yes | No |
| W683 | Drowning and submersion following fall into swimming-pool   | Yes | No |
| W684 | Drowning and submersion following fall into swimming-pool   | Yes | No |
| W685 | Drowning and submersion following fall into swimming-pool   | Yes | No |
| W686 | Drowning and submersion following fall into swimming-pool   | Yes | No |
| W687 | Drowning and submersion following fall into swimming-pool   | Yes | No |
| W688 | Drowning and submersion following fall into swimming-pool   | Yes | No |
| W689 | Drowning and submersion following fall into swimming-pool   | Yes | No |
| W73  | Other specified drowning and submersion                     | Yes | No |
| W730 | Other specified drowning and submersion                     | Yes | No |
| W731 | Other specified drowning and submersion                     | Yes | No |
| W732 | Other specified drowning and submersion                     | Yes | No |
| W733 | Other specified drowning and submersion                     | Yes | No |
| W734 | Other specified drowning and submersion                     | Yes | No |
| W735 | Other specified drowning and submersion                     | Yes | No |
| W736 | Other specified drowning and submersion                     | Yes | No |
| W737 | Other specified drowning and submersion                     | Yes | No |
| W738 | Other specified drowning and submersion                     | Yes | No |
| W739 | Other specified drowning and submersion                     | Yes | No |
| W74  | Unspecified drowning and submersion                         | Yes | No |
| W740 | Unspecified drowning and submersion                         | Yes | No |
| W741 | Unspecified drowning and submersion                         | Yes | No |
| W742 | Unspecified drowning and submersion                         | Yes | No |
| W743 | Unspecified drowning and submersion                         | Yes | No |
| W744 | Unspecified drowning and submersion                         | Yes | No |

|      |                                                                  |     |    |
|------|------------------------------------------------------------------|-----|----|
| W745 | Unspecified drowning and submersion                              | Yes | No |
| W746 | Unspecified drowning and submersion                              | Yes | No |
| W747 | Unspecified drowning and submersion                              | Yes | No |
| W748 | Unspecified drowning and submersion                              | Yes | No |
| W749 | Unspecified drowning and submersion                              | Yes | No |
| W75  | Accidental suffocation and strangulation in bed                  | Yes | No |
| W750 | Accidental suffocation and strangulation in bed                  | Yes | No |
| W751 | Accidental suffocation and strangulation in bed                  | Yes | No |
| W752 | Accidental suffocation and strangulation in bed                  | Yes | No |
| W753 | Accidental suffocation and strangulation in bed                  | Yes | No |
| W754 | Accidental suffocation and strangulation in bed                  | Yes | No |
| W755 | Accidental suffocation and strangulation in bed                  | Yes | No |
| W756 | Accidental suffocation and strangulation in bed                  | Yes | No |
| W757 | Accidental suffocation and strangulation in bed                  | Yes | No |
| W758 | Accidental suffocation and strangulation in bed                  | Yes | No |
| W759 | Accidental suffocation and strangulation in bed                  | Yes | No |
| W76  | Other accidental hanging and strangulation                       | Yes | No |
| W760 | Other accidental hanging and strangulation                       | Yes | No |
| W761 | Other accidental hanging and strangulation                       | Yes | No |
| W762 | Other accidental hanging and strangulation                       | Yes | No |
| W763 | Other accidental hanging and strangulation                       | Yes | No |
| W764 | Other accidental hanging and strangulation                       | Yes | No |
| W765 | Other accidental hanging and strangulation                       | Yes | No |
| W766 | Other accidental hanging and strangulation                       | Yes | No |
| W767 | Other accidental hanging and strangulation                       | Yes | No |
| W768 | Other accidental hanging and strangulation                       | Yes | No |
| W769 | Other accidental hanging and strangulation                       | Yes | No |
| W77  | Threat to breathing due to cave-in, falling earth and other subs | Yes | No |
| W770 | Threat to breathing due to cave-in, falling earth and other subs | Yes | No |
| W771 | Threat to breathing due to cave-in, falling earth and other subs | Yes | No |
| W772 | Threat to breathing due to cave-in, falling earth and other subs | Yes | No |
| W773 | Threat to breathing due to cave-in, falling earth and other subs | Yes | No |
| W774 | Threat to breathing due to cave-in, falling earth and other subs | Yes | No |
| W775 | Threat to breathing due to cave-in, falling earth and other subs | Yes | No |
| W776 | Threat to breathing due to cave-in, falling earth and other subs | Yes | No |
| W777 | Threat to breathing due to cave-in, falling earth and other subs | Yes | No |
| W778 | Threat to breathing due to cave-in, falling earth and other subs | Yes | No |
| W779 | Threat to breathing due to cave-in, falling earth and other subs | Yes | No |
| W78  | Inhalation of gastric contents                                   | Yes | No |
| W780 | Inhalation of gastric contents                                   | Yes | No |
| W781 | Inhalation of gastric contents                                   | Yes | No |
| W782 | Inhalation of gastric contents                                   | Yes | No |
| W783 | Inhalation of gastric contents                                   | Yes | No |
| W784 | Inhalation of gastric contents                                   | Yes | No |
| W785 | Inhalation of gastric contents                                   | Yes | No |
| W786 | Inhalation of gastric contents                                   | Yes | No |
| W787 | Inhalation of gastric contents                                   | Yes | No |
| W788 | Inhalation of gastric contents                                   | Yes | No |
| W789 | Inhalation of gastric contents                                   | Yes | No |
| W79  | Inhalation and ingestion of food causing obstruction of respirat | Yes | No |
| W790 | Inhalation and ingestion of food causing obstruction of respirat | Yes | No |
| W791 | Inhalation and ingestion of food causing obstruction of respirat | Yes | No |
| W792 | Inhalation and ingestion of food causing obstruction of respirat | Yes | No |

|      |                                                                  |     |    |
|------|------------------------------------------------------------------|-----|----|
| W793 | Inhalation and ingestion of food causing obstruction of respirat | Yes | No |
| W794 | Inhalation and ingestion of food causing obstruction of respirat | Yes | No |
| W795 | Inhalation and ingestion of food causing obstruction of respirat | Yes | No |
| W796 | Inhalation and ingestion of food causing obstruction of respirat | Yes | No |
| W797 | Inhalation and ingestion of food causing obstruction of respirat | Yes | No |
| W798 | Inhalation and ingestion of food causing obstruction of respirat | Yes | No |
| W799 | Inhalation and ingestion of food causing obstruction of respirat | Yes | No |
| W80  | Inhalation and ingestion of other objects causing obstruction o  | Yes | No |
| W800 | Inhalation and ingestion of other objects causing obstruction o  | Yes | No |
| W801 | Inhalation and ingestion of other objects causing obstruction o  | Yes | No |
| W802 | Inhalation and ingestion of other objects causing obstruction o  | Yes | No |
| W803 | Inhalation and ingestion of other objects causing obstruction o  | Yes | No |
| W804 | Inhalation and ingestion of other objects causing obstruction o  | Yes | No |
| W805 | Inhalation and ingestion of other objects causing obstruction o  | Yes | No |
| W806 | Inhalation and ingestion of other objects causing obstruction o  | Yes | No |
| W807 | Inhalation and ingestion of other objects causing obstruction o  | Yes | No |
| W808 | Inhalation and ingestion of other objects causing obstruction o  | Yes | No |
| W809 | Inhalation and ingestion of other objects causing obstruction o  | Yes | No |
| W81  | Confined to or trapped in a low-oxygen environment               | Yes | No |
| W810 | Confined to or trapped in a low-oxygen environment               | Yes | No |
| W811 | Confined to or trapped in a low-oxygen environment               | Yes | No |
| W812 | Confined to or trapped in a low-oxygen environment               | Yes | No |
| W813 | Confined to or trapped in a low-oxygen environment               | Yes | No |
| W814 | Confined to or trapped in a low-oxygen environment               | Yes | No |
| W815 | Confined to or trapped in a low-oxygen environment               | Yes | No |
| W816 | Confined to or trapped in a low-oxygen environment               | Yes | No |
| W817 | Confined to or trapped in a low-oxygen environment               | Yes | No |
| W818 | Confined to or trapped in a low-oxygen environment               | Yes | No |
| W819 | Confined to or trapped in a low-oxygen environment               | Yes | No |
| W83  | Other specified threats to breathing                             | Yes | No |
| W830 | Other specified threats to breathing                             | Yes | No |
| W831 | Other specified threats to breathing                             | Yes | No |
| W832 | Other specified threats to breathing                             | Yes | No |
| W833 | Other specified threats to breathing                             | Yes | No |
| W834 | Other specified threats to breathing                             | Yes | No |
| W835 | Other specified threats to breathing                             | Yes | No |
| W836 | Other specified threats to breathing                             | Yes | No |
| W837 | Other specified threats to breathing                             | Yes | No |
| W838 | Other specified threats to breathing                             | Yes | No |
| W839 | Other specified threats to breathing                             | Yes | No |
| W84  | Unspecified threat to breathing                                  | Yes | No |
| W840 | Unspecified threat to breathing                                  | Yes | No |
| W841 | Unspecified threat to breathing                                  | Yes | No |
| W842 | Unspecified threat to breathing                                  | Yes | No |
| W843 | Unspecified threat to breathing                                  | Yes | No |
| W844 | Unspecified threat to breathing                                  | Yes | No |
| W845 | Unspecified threat to breathing                                  | Yes | No |
| W846 | Unspecified threat to breathing                                  | Yes | No |
| W847 | Unspecified threat to breathing                                  | Yes | No |
| W848 | Unspecified threat to breathing                                  | Yes | No |
| W849 | Unspecified threat to breathing                                  | Yes | No |
| W85  | Exposure to electric transmission lines                          | Yes | No |
| W850 | Exposure to electric transmission lines                          | Yes | No |

|      |                                               |     |    |
|------|-----------------------------------------------|-----|----|
| W851 | Exposure to electric transmission lines       | Yes | No |
| W852 | Exposure to electric transmission lines       | Yes | No |
| W853 | Exposure to electric transmission lines       | Yes | No |
| W854 | Exposure to electric transmission lines       | Yes | No |
| W855 | Exposure to electric transmission lines       | Yes | No |
| W856 | Exposure to electric transmission lines       | Yes | No |
| W857 | Exposure to electric transmission lines       | Yes | No |
| W858 | Exposure to electric transmission lines       | Yes | No |
| W859 | Exposure to electric transmission lines       | Yes | No |
| W86  | Exposure to other specified electric current  | Yes | No |
| W860 | Exposure to other specified electric current  | Yes | No |
| W861 | Exposure to other specified electric current  | Yes | No |
| W862 | Exposure to other specified electric current  | Yes | No |
| W863 | Exposure to other specified electric current  | Yes | No |
| W864 | Exposure to other specified electric current  | Yes | No |
| W865 | Exposure to other specified electric current  | Yes | No |
| W866 | Exposure to other specified electric current  | Yes | No |
| W867 | Exposure to other specified electric current  | Yes | No |
| W868 | Exposure to other specified electric current  | Yes | No |
| W869 | Exposure to other specified electric current  | Yes | No |
| W87  | Exposure to unspecified electric current      | Yes | No |
| W870 | Exposure to unspecified electric current      | Yes | No |
| W871 | Exposure to unspecified electric current      | Yes | No |
| W872 | Exposure to unspecified electric current      | Yes | No |
| W873 | Exposure to unspecified electric current      | Yes | No |
| W874 | Exposure to unspecified electric current      | Yes | No |
| W875 | Exposure to unspecified electric current      | Yes | No |
| W876 | Exposure to unspecified electric current      | Yes | No |
| W877 | Exposure to unspecified electric current      | Yes | No |
| W878 | Exposure to unspecified electric current      | Yes | No |
| W879 | Exposure to unspecified electric current      | Yes | No |
| W92  | Exposure to excessive heat of man-made origin | Yes | No |
| W920 | Exposure to excessive heat of man-made origin | Yes | No |
| W921 | Exposure to excessive heat of man-made origin | Yes | No |
| W922 | Exposure to excessive heat of man-made origin | Yes | No |
| W923 | Exposure to excessive heat of man-made origin | Yes | No |
| W924 | Exposure to excessive heat of man-made origin | Yes | No |
| W925 | Exposure to excessive heat of man-made origin | Yes | No |
| W926 | Exposure to excessive heat of man-made origin | Yes | No |
| W927 | Exposure to excessive heat of man-made origin | Yes | No |
| W928 | Exposure to excessive heat of man-made origin | Yes | No |
| W929 | Exposure to excessive heat of man-made origin | Yes | No |
| W93  | Exposure to excessive cold of man-made origin | Yes | No |
| W930 | Exposure to excessive cold of man-made origin | Yes | No |
| W931 | Exposure to excessive cold of man-made origin | Yes | No |
| W932 | Exposure to excessive cold of man-made origin | Yes | No |
| W933 | Exposure to excessive cold of man-made origin | Yes | No |
| W934 | Exposure to excessive cold of man-made origin | Yes | No |
| W935 | Exposure to excessive cold of man-made origin | Yes | No |
| W936 | Exposure to excessive cold of man-made origin | Yes | No |
| W937 | Exposure to excessive cold of man-made origin | Yes | No |
| W938 | Exposure to excessive cold of man-made origin | Yes | No |
| W939 | Exposure to excessive cold of man-made origin | Yes | No |

|      |                                                             |     |    |
|------|-------------------------------------------------------------|-----|----|
| W99  | Exposure to other and unspecified man-made environmental f  | Yes | No |
| W990 | Exposure to other and unspecified man-made environmental f  | Yes | No |
| W991 | Exposure to other and unspecified man-made environmental f  | Yes | No |
| W992 | Exposure to other and unspecified man-made environmental f  | Yes | No |
| W993 | Exposure to other and unspecified man-made environmental f  | Yes | No |
| W994 | Exposure to other and unspecified man-made environmental f  | Yes | No |
| W995 | Exposure to other and unspecified man-made environmental f  | Yes | No |
| W996 | Exposure to other and unspecified man-made environmental f  | Yes | No |
| W997 | Exposure to other and unspecified man-made environmental f  | Yes | No |
| W998 | Exposure to other and unspecified man-made environmental f  | Yes | No |
| W999 | Exposure to other and unspecified man-made environmental f  | Yes | No |
| X00  | Exposure to uncontrolled fire in building or structure      | Yes | No |
| X000 | Exposure to uncontrolled fire in building or structure      | Yes | No |
| X001 | Exposure to uncontrolled fire in building or structure      | Yes | No |
| X002 | Exposure to uncontrolled fire in building or structure      | Yes | No |
| X003 | Exposure to uncontrolled fire in building or structure      | Yes | No |
| X004 | Exposure to uncontrolled fire in building or structure      | Yes | No |
| X005 | Exposure to uncontrolled fire in building or structure      | Yes | No |
| X006 | Exposure to uncontrolled fire in building or structure      | Yes | No |
| X007 | Exposure to uncontrolled fire in building or structure      | Yes | No |
| X008 | Exposure to uncontrolled fire in building or structure      | Yes | No |
| X009 | Exposure to uncontrolled fire in building or structure      | Yes | No |
| X01  | Exposure to uncontrolled fire, not in building or structure | Yes | No |
| X010 | Exposure to uncontrolled fire, not in building or structure | Yes | No |
| X011 | Exposure to uncontrolled fire, not in building or structure | Yes | No |
| X012 | Exposure to uncontrolled fire, not in building or structure | Yes | No |
| X013 | Exposure to uncontrolled fire, not in building or structure | Yes | No |
| X014 | Exposure to uncontrolled fire, not in building or structure | Yes | No |
| X015 | Exposure to uncontrolled fire, not in building or structure | Yes | No |
| X016 | Exposure to uncontrolled fire, not in building or structure | Yes | No |
| X017 | Exposure to uncontrolled fire, not in building or structure | Yes | No |
| X018 | Exposure to uncontrolled fire, not in building or structure | Yes | No |
| X019 | Exposure to uncontrolled fire, not in building or structure | Yes | No |
| X03  | Exposure to controlled fire, not in building or structure   | Yes | No |
| X030 | Exposure to controlled fire, not in building or structure   | Yes | No |
| X031 | Exposure to controlled fire, not in building or structure   | Yes | No |
| X032 | Exposure to controlled fire, not in building or structure   | Yes | No |
| X033 | Exposure to controlled fire, not in building or structure   | Yes | No |
| X034 | Exposure to controlled fire, not in building or structure   | Yes | No |
| X035 | Exposure to controlled fire, not in building or structure   | Yes | No |
| X036 | Exposure to controlled fire, not in building or structure   | Yes | No |
| X037 | Exposure to controlled fire, not in building or structure   | Yes | No |
| X038 | Exposure to controlled fire, not in building or structure   | Yes | No |
| X039 | Exposure to controlled fire, not in building or structure   | Yes | No |
| X04  | Exposure to ignition of highly flammable material           | Yes | No |
| X040 | Exposure to ignition of highly flammable material           | Yes | No |
| X041 | Exposure to ignition of highly flammable material           | Yes | No |
| X042 | Exposure to ignition of highly flammable material           | Yes | No |
| X043 | Exposure to ignition of highly flammable material           | Yes | No |
| X044 | Exposure to ignition of highly flammable material           | Yes | No |
| X045 | Exposure to ignition of highly flammable material           | Yes | No |
| X046 | Exposure to ignition of highly flammable material           | Yes | No |
| X047 | Exposure to ignition of highly flammable material           | Yes | No |



|      |                                                               |     |    |
|------|---------------------------------------------------------------|-----|----|
| X048 | Exposure to ignition of highly flammable material             | Yes | No |
| X049 | Exposure to ignition of highly flammable material             | Yes | No |
| X05  | Exposure to ignition or melting of nightwear                  | Yes | No |
| X050 | Exposure to ignition or melting of nightwear                  | Yes | No |
| X051 | Exposure to ignition or melting of nightwear                  | Yes | No |
| X052 | Exposure to ignition or melting of nightwear                  | Yes | No |
| X053 | Exposure to ignition or melting of nightwear                  | Yes | No |
| X054 | Exposure to ignition or melting of nightwear                  | Yes | No |
| X055 | Exposure to ignition or melting of nightwear                  | Yes | No |
| X056 | Exposure to ignition or melting of nightwear                  | Yes | No |
| X057 | Exposure to ignition or melting of nightwear                  | Yes | No |
| X058 | Exposure to ignition or melting of nightwear                  | Yes | No |
| X059 | Exposure to ignition or melting of nightwear                  | Yes | No |
| X06  | Exposure to ignition or melting of other clothing and apparel | Yes | No |
| X060 | Exposure to ignition or melting of other clothing and apparel | Yes | No |
| X061 | Exposure to ignition or melting of other clothing and apparel | Yes | No |
| X062 | Exposure to ignition or melting of other clothing and apparel | Yes | No |
| X063 | Exposure to ignition or melting of other clothing and apparel | Yes | No |
| X064 | Exposure to ignition or melting of other clothing and apparel | Yes | No |
| X065 | Exposure to ignition or melting of other clothing and apparel | Yes | No |
| X066 | Exposure to ignition or melting of other clothing and apparel | Yes | No |
| X067 | Exposure to ignition or melting of other clothing and apparel | Yes | No |
| X068 | Exposure to ignition or melting of other clothing and apparel | Yes | No |
| X069 | Exposure to ignition or melting of other clothing and apparel | Yes | No |
| X08  | Exposure to other specified smoke, fire and flames            | Yes | No |
| X080 | Exposure to other specified smoke, fire and flames            | Yes | No |
| X081 | Exposure to other specified smoke, fire and flames            | Yes | No |
| X082 | Exposure to other specified smoke, fire and flames            | Yes | No |
| X083 | Exposure to other specified smoke, fire and flames            | Yes | No |
| X084 | Exposure to other specified smoke, fire and flames            | Yes | No |
| X085 | Exposure to other specified smoke, fire and flames            | Yes | No |
| X086 | Exposure to other specified smoke, fire and flames            | Yes | No |
| X087 | Exposure to other specified smoke, fire and flames            | Yes | No |
| X088 | Exposure to other specified smoke, fire and flames            | Yes | No |
| X089 | Exposure to other specified smoke, fire and flames            | Yes | No |
| X09  | Exposure to unspecified smoke, fire and flames                | Yes | No |
| X090 | Exposure to unspecified smoke, fire and flames                | Yes | No |
| X091 | Exposure to unspecified smoke, fire and flames                | Yes | No |
| X092 | Exposure to unspecified smoke, fire and flames                | Yes | No |
| X093 | Exposure to unspecified smoke, fire and flames                | Yes | No |
| X094 | Exposure to unspecified smoke, fire and flames                | Yes | No |
| X095 | Exposure to unspecified smoke, fire and flames                | Yes | No |
| X096 | Exposure to unspecified smoke, fire and flames                | Yes | No |
| X097 | Exposure to unspecified smoke, fire and flames                | Yes | No |
| X098 | Exposure to unspecified smoke, fire and flames                | Yes | No |
| X099 | Exposure to unspecified smoke, fire and flames                | Yes | No |
| X10  | Contact with hot drinks, food, fats and cooking oils          | Yes | No |
| X100 | Contact with hot drinks, food, fats and cooking oils          | Yes | No |
| X101 | Contact with hot drinks, food, fats and cooking oils          | Yes | No |
| X102 | Contact with hot drinks, food, fats and cooking oils          | Yes | No |
| X103 | Contact with hot drinks, food, fats and cooking oils          | Yes | No |
| X104 | Contact with hot drinks, food, fats and cooking oils          | Yes | No |
| X105 | Contact with hot drinks, food, fats and cooking oils          | Yes | No |



|      |                                                      |     |    |
|------|------------------------------------------------------|-----|----|
| X106 | Contact with hot drinks, food, fats and cooking oils | Yes | No |
| X107 | Contact with hot drinks, food, fats and cooking oils | Yes | No |
| X108 | Contact with hot drinks, food, fats and cooking oils | Yes | No |
| X109 | Contact with hot drinks, food, fats and cooking oils | Yes | No |
| X11  | Contact with hot tap-water                           | Yes | No |
| X110 | Contact with hot tap-water                           | Yes | No |
| X111 | Contact with hot tap-water                           | Yes | No |
| X112 | Contact with hot tap-water                           | Yes | No |
| X113 | Contact with hot tap-water                           | Yes | No |
| X114 | Contact with hot tap-water                           | Yes | No |
| X115 | Contact with hot tap-water                           | Yes | No |
| X116 | Contact with hot tap-water                           | Yes | No |
| X117 | Contact with hot tap-water                           | Yes | No |
| X118 | Contact with hot tap-water                           | Yes | No |
| X119 | Contact with hot tap-water                           | Yes | No |
| X12  | Contact with other hot fluids                        | Yes | No |
| X120 | Contact with other hot fluids                        | Yes | No |
| X121 | Contact with other hot fluids                        | Yes | No |
| X122 | Contact with other hot fluids                        | Yes | No |
| X123 | Contact with other hot fluids                        | Yes | No |
| X124 | Contact with other hot fluids                        | Yes | No |
| X125 | Contact with other hot fluids                        | Yes | No |
| X126 | Contact with other hot fluids                        | Yes | No |
| X127 | Contact with other hot fluids                        | Yes | No |
| X128 | Contact with other hot fluids                        | Yes | No |
| X129 | Contact with other hot fluids                        | Yes | No |
| X13  | Contact with steam and hot vapours                   | Yes | No |
| X130 | Contact with steam and hot vapours                   | Yes | No |
| X131 | Contact with steam and hot vapours                   | Yes | No |
| X132 | Contact with steam and hot vapours                   | Yes | No |
| X133 | Contact with steam and hot vapours                   | Yes | No |
| X134 | Contact with steam and hot vapours                   | Yes | No |
| X135 | Contact with steam and hot vapours                   | Yes | No |
| X136 | Contact with steam and hot vapours                   | Yes | No |
| X137 | Contact with steam and hot vapours                   | Yes | No |
| X138 | Contact with steam and hot vapours                   | Yes | No |
| X139 | Contact with steam and hot vapours                   | Yes | No |
| X14  | Contact with hot air and gases                       | Yes | No |
| X140 | Contact with hot air and gases                       | Yes | No |
| X141 | Contact with hot air and gases                       | Yes | No |
| X142 | Contact with hot air and gases                       | Yes | No |
| X143 | Contact with hot air and gases                       | Yes | No |
| X144 | Contact with hot air and gases                       | Yes | No |
| X145 | Contact with hot air and gases                       | Yes | No |
| X146 | Contact with hot air and gases                       | Yes | No |
| X147 | Contact with hot air and gases                       | Yes | No |
| X148 | Contact with hot air and gases                       | Yes | No |
| X149 | Contact with hot air and gases                       | Yes | No |
| X15  | Contact with hot household appliances                | Yes | No |
| X150 | Contact with hot household appliances                | Yes | No |
| X151 | Contact with hot household appliances                | Yes | No |
| X152 | Contact with hot household appliances                | Yes | No |
| X153 | Contact with hot household appliances                | Yes | No |

|      |                                                            |     |    |
|------|------------------------------------------------------------|-----|----|
| X154 | Contact with hot household appliances                      | Yes | No |
| X155 | Contact with hot household appliances                      | Yes | No |
| X156 | Contact with hot household appliances                      | Yes | No |
| X157 | Contact with hot household appliances                      | Yes | No |
| X158 | Contact with hot household appliances                      | Yes | No |
| X159 | Contact with hot household appliances                      | Yes | No |
| X16  | Contact with hot heating appliances, radiators and pipes   | Yes | No |
| X160 | Contact with hot heating appliances, radiators and pipes   | Yes | No |
| X161 | Contact with hot heating appliances, radiators and pipes   | Yes | No |
| X162 | Contact with hot heating appliances, radiators and pipes   | Yes | No |
| X163 | Contact with hot heating appliances, radiators and pipes   | Yes | No |
| X164 | Contact with hot heating appliances, radiators and pipes   | Yes | No |
| X165 | Contact with hot heating appliances, radiators and pipes   | Yes | No |
| X166 | Contact with hot heating appliances, radiators and pipes   | Yes | No |
| X167 | Contact with hot heating appliances, radiators and pipes   | Yes | No |
| X168 | Contact with hot heating appliances, radiators and pipes   | Yes | No |
| X169 | Contact with hot heating appliances, radiators and pipes   | Yes | No |
| X17  | Contact with hot engines, machinery and tools              | Yes | No |
| X170 | Contact with hot engines, machinery and tools              | Yes | No |
| X171 | Contact with hot engines, machinery and tools              | Yes | No |
| X172 | Contact with hot engines, machinery and tools              | Yes | No |
| X173 | Contact with hot engines, machinery and tools              | Yes | No |
| X174 | Contact with hot engines, machinery and tools              | Yes | No |
| X175 | Contact with hot engines, machinery and tools              | Yes | No |
| X176 | Contact with hot engines, machinery and tools              | Yes | No |
| X177 | Contact with hot engines, machinery and tools              | Yes | No |
| X178 | Contact with hot engines, machinery and tools              | Yes | No |
| X179 | Contact with hot engines, machinery and tools              | Yes | No |
| X18  | Contact with other hot metals                              | Yes | No |
| X180 | Contact with other hot metals                              | Yes | No |
| X181 | Contact with other hot metals                              | Yes | No |
| X182 | Contact with other hot metals                              | Yes | No |
| X183 | Contact with other hot metals                              | Yes | No |
| X184 | Contact with other hot metals                              | Yes | No |
| X185 | Contact with other hot metals                              | Yes | No |
| X186 | Contact with other hot metals                              | Yes | No |
| X187 | Contact with other hot metals                              | Yes | No |
| X188 | Contact with other hot metals                              | Yes | No |
| X189 | Contact with other hot metals                              | Yes | No |
| X19  | Contact with other and unspecified heat and hot substances | Yes | No |
| X190 | Contact with other and unspecified heat and hot substances | Yes | No |
| X191 | Contact with other and unspecified heat and hot substances | Yes | No |
| X192 | Contact with other and unspecified heat and hot substances | Yes | No |
| X193 | Contact with other and unspecified heat and hot substances | Yes | No |
| X194 | Contact with other and unspecified heat and hot substances | Yes | No |
| X195 | Contact with other and unspecified heat and hot substances | Yes | No |
| X196 | Contact with other and unspecified heat and hot substances | Yes | No |
| X197 | Contact with other and unspecified heat and hot substances | Yes | No |
| X198 | Contact with other and unspecified heat and hot substances | Yes | No |
| X199 | Contact with other and unspecified heat and hot substances | Yes | No |
| X20  | Contact with venomous snakes and lizards                   | Yes | No |
| X200 | Contact with venomous snakes and lizards                   | Yes | No |
| X201 | Contact with venomous snakes and lizards                   | Yes | No |

|      |                                                            |     |    |
|------|------------------------------------------------------------|-----|----|
| X202 | Contact with venomous snakes and lizards                   | Yes | No |
| X203 | Contact with venomous snakes and lizards                   | Yes | No |
| X204 | Contact with venomous snakes and lizards                   | Yes | No |
| X205 | Contact with venomous snakes and lizards                   | Yes | No |
| X206 | Contact with venomous snakes and lizards                   | Yes | No |
| X207 | Contact with venomous snakes and lizards                   | Yes | No |
| X208 | Contact with venomous snakes and lizards                   | Yes | No |
| X209 | Contact with venomous snakes and lizards                   | Yes | No |
| X21  | Contact with venomous spiders                              | Yes | No |
| X210 | Contact with venomous spiders                              | Yes | No |
| X211 | Contact with venomous spiders                              | Yes | No |
| X212 | Contact with venomous spiders                              | Yes | No |
| X213 | Contact with venomous spiders                              | Yes | No |
| X214 | Contact with venomous spiders                              | Yes | No |
| X215 | Contact with venomous spiders                              | Yes | No |
| X216 | Contact with venomous spiders                              | Yes | No |
| X217 | Contact with venomous spiders                              | Yes | No |
| X218 | Contact with venomous spiders                              | Yes | No |
| X219 | Contact with venomous spiders                              | Yes | No |
| X22  | Contact with scorpions                                     | Yes | No |
| X220 | Contact with scorpions                                     | Yes | No |
| X221 | Contact with scorpions                                     | Yes | No |
| X222 | Contact with scorpions                                     | Yes | No |
| X223 | Contact with scorpions                                     | Yes | No |
| X224 | Contact with scorpions                                     | Yes | No |
| X225 | Contact with scorpions                                     | Yes | No |
| X226 | Contact with scorpions                                     | Yes | No |
| X227 | Contact with scorpions                                     | Yes | No |
| X228 | Contact with scorpions                                     | Yes | No |
| X229 | Contact with scorpions                                     | Yes | No |
| X23  | Contact with hornets, wasps and bees                       | Yes | No |
| X230 | Contact with hornets, wasps and bees                       | Yes | No |
| X231 | Contact with hornets, wasps and bees                       | Yes | No |
| X232 | Contact with hornets, wasps and bees                       | Yes | No |
| X233 | Contact with hornets, wasps and bees                       | Yes | No |
| X234 | Contact with hornets, wasps and bees                       | Yes | No |
| X235 | Contact with hornets, wasps and bees                       | Yes | No |
| X236 | Contact with hornets, wasps and bees                       | Yes | No |
| X237 | Contact with hornets, wasps and bees                       | Yes | No |
| X238 | Contact with hornets, wasps and bees                       | Yes | No |
| X239 | Contact with hornets, wasps and bees                       | Yes | No |
| X24  | Contact with centipedes and venomous millipedes (tropical) | Yes | No |
| X240 | Contact with centipedes and venomous millipedes (tropical) | Yes | No |
| X241 | Contact with centipedes and venomous millipedes (tropical) | Yes | No |
| X242 | Contact with centipedes and venomous millipedes (tropical) | Yes | No |
| X243 | Contact with centipedes and venomous millipedes (tropical) | Yes | No |
| X244 | Contact with centipedes and venomous millipedes (tropical) | Yes | No |
| X245 | Contact with centipedes and venomous millipedes (tropical) | Yes | No |
| X246 | Contact with centipedes and venomous millipedes (tropical) | Yes | No |
| X247 | Contact with centipedes and venomous millipedes (tropical) | Yes | No |
| X248 | Contact with centipedes and venomous millipedes (tropical) | Yes | No |
| X249 | Contact with centipedes and venomous millipedes (tropical) | Yes | No |
| X25  | Contact with other venomous arthropods                     | Yes | No |

|      |                                                   |     |    |
|------|---------------------------------------------------|-----|----|
| X250 | Contact with other venomous arthropods            | Yes | No |
| X251 | Contact with other venomous arthropods            | Yes | No |
| X252 | Contact with other venomous arthropods            | Yes | No |
| X253 | Contact with other venomous arthropods            | Yes | No |
| X254 | Contact with other venomous arthropods            | Yes | No |
| X255 | Contact with other venomous arthropods            | Yes | No |
| X256 | Contact with other venomous arthropods            | Yes | No |
| X257 | Contact with other venomous arthropods            | Yes | No |
| X258 | Contact with other venomous arthropods            | Yes | No |
| X259 | Contact with other venomous arthropods            | Yes | No |
| X26  | Contact with venomous marine animals and plants   | Yes | No |
| X260 | Contact with venomous marine animals and plants   | Yes | No |
| X261 | Contact with venomous marine animals and plants   | Yes | No |
| X262 | Contact with venomous marine animals and plants   | Yes | No |
| X263 | Contact with venomous marine animals and plants   | Yes | No |
| X264 | Contact with venomous marine animals and plants   | Yes | No |
| X265 | Contact with venomous marine animals and plants   | Yes | No |
| X266 | Contact with venomous marine animals and plants   | Yes | No |
| X267 | Contact with venomous marine animals and plants   | Yes | No |
| X268 | Contact with venomous marine animals and plants   | Yes | No |
| X269 | Contact with venomous marine animals and plants   | Yes | No |
| X27  | Contact with other specified venomous animals     | Yes | No |
| X270 | Contact with other specified venomous animals     | Yes | No |
| X271 | Contact with other specified venomous animals     | Yes | No |
| X272 | Contact with other specified venomous animals     | Yes | No |
| X273 | Contact with other specified venomous animals     | Yes | No |
| X274 | Contact with other specified venomous animals     | Yes | No |
| X275 | Contact with other specified venomous animals     | Yes | No |
| X276 | Contact with other specified venomous animals     | Yes | No |
| X277 | Contact with other specified venomous animals     | Yes | No |
| X278 | Contact with other specified venomous animals     | Yes | No |
| X279 | Contact with other specified venomous animals     | Yes | No |
| X28  | Contact with other specified venomous plants      | Yes | No |
| X280 | Contact with other specified venomous plants      | Yes | No |
| X281 | Contact with other specified venomous plants      | Yes | No |
| X282 | Contact with other specified venomous plants      | Yes | No |
| X283 | Contact with other specified venomous plants      | Yes | No |
| X284 | Contact with other specified venomous plants      | Yes | No |
| X285 | Contact with other specified venomous plants      | Yes | No |
| X286 | Contact with other specified venomous plants      | Yes | No |
| X287 | Contact with other specified venomous plants      | Yes | No |
| X288 | Contact with other specified venomous plants      | Yes | No |
| X289 | Contact with other specified venomous plants      | Yes | No |
| X29  | Contact with unspecified venomous animal or plant | Yes | No |
| X290 | Contact with unspecified venomous animal or plant | Yes | No |
| X291 | Contact with unspecified venomous animal or plant | Yes | No |
| X292 | Contact with unspecified venomous animal or plant | Yes | No |
| X293 | Contact with unspecified venomous animal or plant | Yes | No |
| X294 | Contact with unspecified venomous animal or plant | Yes | No |
| X295 | Contact with unspecified venomous animal or plant | Yes | No |
| X296 | Contact with unspecified venomous animal or plant | Yes | No |
| X297 | Contact with unspecified venomous animal or plant | Yes | No |
| X298 | Contact with unspecified venomous animal or plant | Yes | No |

|      |                                                   |     |    |
|------|---------------------------------------------------|-----|----|
| X299 | Contact with unspecified venomous animal or plant | Yes | No |
| X30  | Exposure to excessive natural heat                | Yes | No |
| X300 | Exposure to excessive natural heat                | Yes | No |
| X301 | Exposure to excessive natural heat                | Yes | No |
| X302 | Exposure to excessive natural heat                | Yes | No |
| X303 | Exposure to excessive natural heat                | Yes | No |
| X304 | Exposure to excessive natural heat                | Yes | No |
| X305 | Exposure to excessive natural heat                | Yes | No |
| X306 | Exposure to excessive natural heat                | Yes | No |
| X307 | Exposure to excessive natural heat                | Yes | No |
| X308 | Exposure to excessive natural heat                | Yes | No |
| X309 | Exposure to excessive natural heat                | Yes | No |
| X31  | Exposure to excessive natural cold                | Yes | No |
| X310 | Exposure to excessive natural cold                | Yes | No |
| X311 | Exposure to excessive natural cold                | Yes | No |
| X312 | Exposure to excessive natural cold                | Yes | No |
| X313 | Exposure to excessive natural cold                | Yes | No |
| X314 | Exposure to excessive natural cold                | Yes | No |
| X315 | Exposure to excessive natural cold                | Yes | No |
| X316 | Exposure to excessive natural cold                | Yes | No |
| X317 | Exposure to excessive natural cold                | Yes | No |
| X318 | Exposure to excessive natural cold                | Yes | No |
| X319 | Exposure to excessive natural cold                | Yes | No |
| X32  | Exposure to sunlight                              | Yes | No |
| X320 | Exposure to sunlight                              | Yes | No |
| X321 | Exposure to sunlight                              | Yes | No |
| X322 | Exposure to sunlight                              | Yes | No |
| X323 | Exposure to sunlight                              | Yes | No |
| X324 | Exposure to sunlight                              | Yes | No |
| X325 | Exposure to sunlight                              | Yes | No |
| X326 | Exposure to sunlight                              | Yes | No |
| X327 | Exposure to sunlight                              | Yes | No |
| X328 | Exposure to sunlight                              | Yes | No |
| X329 | Exposure to sunlight                              | Yes | No |
| X58  | Exposure to other specified factors               | Yes | No |
| X580 | Exposure to other specified factors               | Yes | No |
| X581 | Exposure to other specified factors               | Yes | No |
| X582 | Exposure to other specified factors               | Yes | No |
| X583 | Exposure to other specified factors               | Yes | No |
| X584 | Exposure to other specified factors               | Yes | No |
| X585 | Exposure to other specified factors               | Yes | No |
| X586 | Exposure to other specified factors               | Yes | No |
| X587 | Exposure to other specified factors               | Yes | No |
| X588 | Exposure to other specified factors               | Yes | No |
| X589 | Exposure to other specified factors               | Yes | No |
| X59  | Exposure to unspecified factor                    | Yes | No |
| X590 | Exposure to unspecified factor                    | Yes | No |
| X591 | Exposure to unspecified factor                    | Yes | No |
| X592 | Exposure to unspecified factor                    | Yes | No |
| X593 | Exposure to unspecified factor                    | Yes | No |
| X594 | Exposure to unspecified factor                    | Yes | No |
| X595 | Exposure to unspecified factor                    | Yes | No |
| X596 | Exposure to unspecified factor                    | Yes | No |

|      |                                |     |    |
|------|--------------------------------|-----|----|
| X597 | Exposure to unspecified factor | Yes | No |
| X598 | Exposure to unspecified factor | Yes | No |
| X599 | Exposure to unspecified factor | Yes | No |
